# Supplementary material for: Health-related quality of life and its associated factors among Chinese seasonal retired migrants in Hainan
Source: PeerJ journal article supplement (doi:10.7717/peerj.18574), 2024-11-21
Supplement: Data_and_Code.zip [file Data_and_Code.zip]

## Sheet: Sheet
										PSQI Items																				IPAQ Items												EQ-5D-5L Items
pid	Sex	Age	Marriage	Edu	Height	Weight	Income	Smoke	Alcoholic	Sleep1Hour	Sleep1Min	Sleep2	Sleep3Hour	Sleep3Min	Sleep4	Sleep5	Sleep6	Sleep7	Sleep8	Sleep9	Sleep10	Sleep11	Sleep12	Sleep13	Sleep14	Sleep15	Sleep16	Sleep17	Sleep18	HeavyExerciseDay	HeavyExerciseHour	HeavyExerciseMin	ModerateExerciseDay	ModerateExerciseHour	ModerateExerciseMin	WalkDay	WalkHour	WalkMin	RestHour	RestMin	CDisease	EQ1	EQ2	EQ3	EQ4	EQ5	VAS
1	2	67	1	4	167	65	1	3	3	23	0	2	6	0	5	1	0	2	0	0	0	0	0	0	1	0	0	0	4	0	0	0	0	0	0	7	1	30	5	0	0	1	1	1	1	1	81
2	2	62	1	4	165	62	3	3	3	22	30	2	6	30	7	1	1	1	0	0	0	1	0	2	1	0	0	1	1	0	0	0	0	0	0	0	0	0	3	0	1	5	4	4	3	1	0
3	2	73	1	4	156	65	2	3	1	18	30	1	5	30	7	0	0	0	0	0	0	0	0	0	1	0	0	0	1	0	0	0	5	1	30	5	1	30	2	30	0	1	1	1	1	1	82
4	2	71	1	4	152	62	3	3	1	23	0	1	5	30	6	0	0	3	0	0	0	0	0	0	0	0	0	0	4	0	0	0	7	1	40	0	0	0	3	0	1	1	1	1	1	1	88
5	2	68	2	4	160	56	1	3	2	24	0	1	6	30	6	0	0	0	0	0	0	0	0	0	0	0	3	0	1	0	0	0	7	3	0	7	1	0	6	0	0	1	1	1	1	1	85
6	2	68	1	4	158	50	3	3	3	23	0	3	7	30	6	3	2	3	1	1	1	0	0	0	2	3	0	1	4	1	1	10	2	1	0	0	0	0	2	30	1	4	2	2	4	2	76
7	2	66	1	4	164	70	3	3	3	22	30	1	6	30	6	0	0	1	0	0	0	0	0	0	1	0	0	0	2	0	0	0	0	0	0	7	1	0	3	30	0	1	1	1	1	1	99
8	2	75	1	4	159	60	2	3	3	21	0	4	6	0	5	3	2	2	0	2	0	0	0	0	3	0	0	0	1	0	0	0	0	0	0	7	2	0	4	0	1	1	1	1	1	1	83
9	2	79	1	3	155	55	3	3	3	21	0	4	6	0	6	3	2	2	0	0	0	0	0	0	2	3	3	0	3	0	0	0	0	0	0	7	1	0	4	0	1	1	1	1	1	1	92
10	2	72	2	3	158	55	1	3	3	22	0	2	6	30	6	1	2	3	0	0	0	0	0	0	1	0	0	1	4	0	0	0	5	1	0	7	1	0	3	0	1	1	1	1	1	1	90
11	2	65	1	4	164	55	2	3	3	23	30	3	7	0	5	3	0	3	0	0	0	0	0	0	2	0	0	0	4	3	1	0	5	1	30	0	0	0	2	0	1	1	1	1	1	1	75
12	2	66	1	3	151	60	1	3	3	22	0	3	5	30	6	3	2	2	2	3	0	0	0	0	1	3	0	0	4	0	0	0	0	0	0	7	3	0	3	0	1	1	1	1	1	1	72
13	2	68	1	4	165	92	2	3	3	24	0	2	8	30	6	3	2	2	0	0	0	0	0	3	1	0	0	3	4	0	0	0	0	0	0	0	0	0	6	0	1	1	1	1	2	2	67
14	2	68	1	4	170	71	2	3	3	21	30	3	6	30	7	0	0	0	0	0	0	0	0	0	1	0	0	0	1	1	1	20	6	1	30	5	1	20	2	10	0	1	1	1	1	1	83
15	2	68	1	4	160	60	2	3	3	23	10	2	6	30	6	2	1	3	0	0	0	0	0	0	1	0	0	0	1	4	0	0	5	0	30	0	0	0	4	0	1	1	1	1	2	1	98
16	2	61	1	4	165	69	2	3	2	22	0	4	7	0	6	3	1	2	0	3	0	0	2	0	2	2	0	0	4	0	0	0	6	1	0	6	2	0	3	0	1	1	1	1	1	2	93
17	2	60	1	4	153	61	2	3	3	23	0	2	10	10	10	1	2	2	0	0	0	0	0	0	1	0	0	1	2	1	2	10	0	0	0	2	2	10	1	0	1	1	1	1	1	1	95
18	2	66	1	4	156	52	3	3	3	23	30	1	6	30	7	0	0	1	0	0	0	0	1	0	1	0	0	0	2	7	4	0	7	2	0	0	0	0	2	0	0	4	2	1	5	1	80
19	2	67	1	2	165	57	1	3	3	21	0	4	8	0	7	3	3	0	0	0	0	3	0	0	2	3	0	0	1	0	0	0	0	0	0	7	1	0	6	0	0	2	1	1	1	1	87
20	2	62	1	3	153	53	1	3	3	22	10	3	6	10	7	0	0	0	0	0	0	0	2	0	1	0	3	0	3	1	1	10	1	1	10	6	1	10	2	30	0	1	1	1	1	1	90
21	2	71	1	4	160	65	3	3	3	22	30	1	7	0	6	0	3	3	0	0	0	0	0	0	1	0	0	0	1	0	0	0	0	0	0	0	0	0	6	0	1	1	1	1	1	1	71
22	2	68	1	4	154	40	3	3	3	22	10	1	6	30	6	0	2	1	0	0	0	0	0	0	1	0	0	0	4	0	0	0	6	2	10	7	1	20	4	10	0	1	1	1	1	2	57
23	2	56	1	3	158	50	1	3	3	21	0	1	9	0	8	0	0	0	0	0	0	0	0	0	0	0	0	0	3	0	0	0	4	0	0	0	0	0	5	0	0	1	1	1	1	1	100
24	2	72	1	4	156	52	2	3	2	23	0	4	6	0	3	3	0	3	3	3	3	3	0	0	3	3	0	0	4	0	0	0	1	1	0	7	1	30	5	30	1	1	1	1	1	1	80
25	2	62	1	4	164	50	1	3	3	23	0	1	6	0	7	0	1	1	2	0	0	0	0	0	1	0	0	0	1	7	2	0	7	2	0	7	2	0	3	0	1	1	1	1	2	1	92
26	2	58	1	4	164	63	2	3	3	23	0	2	7	0	7	0	0	1	0	0	0	0	0	0	0	0	0	0	2	0	0	0	4	0.5	0	5	0.5	0	2	0	1	1	1	1	1	1	100
27	2	58	1	4	164	65	3	3	3	23	0	2	8	0	7.5	0	0	1	0	0	0	0	0	0	0	0	0	0	4	0	0	0	7	1	0	7	1	0	1	0	1	1	1	1	1	1	100
28	2	71	1	2	152	55	2	3	3	21	0	2	5	0	7	3	3	3	0	3	0	0	0	0	1	3	0	0	4	0	0	0	0	0	0	0	0	0	2	0	1	1	1	1	2	1	72
29	2	59	1	2	162	80	2	3	3	21	0	4	6	0	6	2	1	1	0	1	0	0	1	0	1	0	0	0	4	0	0	0	7	1	0	7	1	0	3	0	1	1	1	1	1	1	80
30	2	57	1	3	155	49	1	3	3	21	0	1	5	0	6	0	0	0	0	0	0	0	0	0	0	0	0	0	4	0	0	0	7	1	0	7	1	1	4	0	0	1	1	1	1	1	92
31	2	71	1	2	162	68	1	3	3	23	30	4	6	30	4	3	3	3	0	0	0	0	1	1	2	0	0	0	3	0	0	0	0	0	0	7	1	0	6	0	0	1	1	1	1	1	82
32	2	65	1	3	167	60	1	3	3	22	0	1	8	0	10	0	0	0	0	0	0	0	0	0	0	0	0	0	4	0	0	0	7	1	0	7	2	0	0	30	1	1	1	1	1	1	86
33	2	63	1	3	157	60	3	3	1	22	0	1	7	0	7	0	0	0	0	1	0	0	0	0	0	0	0	0	2	0	0	0	7	1	0	7	1	0	1	0	0	1	1	1	1	1	94
34	2	67	1	2	170	62	1	3	3	23	0	2	6	0	7	0	0	3	0	0	0	0	0	0	0	0	0	0	1	0	0	0	0	0	0	7	1	30	6	0	0	1	1	1	1	1	86
35	2	66	1	4	170	68	1	3	3	22	0	3	5	30	6	2	1	0	0	0	0	0	0	0	2	0	0	0	3	0	0	0	3	1	0	0	0	0	0	0	0	1	1	1	1	1	84
36	2	61	2	3	162	65	1	3	1	22	0	2	7	0	7	0	1	1	0	0	0	0	0	0	0	0	0	0	1	0	0	0	7	1	30	7	1	30	6	0	0	1	1	1	1	1	85
37	2	57	1	3	152	65	3	3	1	22	30	1	6	30	5	0	3	3	0	3	0	0	0	0	1	0	0	0	4	0	0	0	0	0	0	0	0	0	4	0	0	1	1	1	2	1	85
38	2	74	1	3	154	62	1	3	1	22	45	1	5	30	6.5	0	3	3	0	0	0	0	0	0	1	0	0	0	4	0	0	0	7	4	0	0	0	0	1	30	1	1	1	1	2	1	75
39	2	69	2	4	156	53	2	3	3	21	30	1	6	10	7	0	0	1	0	0	0	0	0	0	0	0	0	0	1	1	1	10	6	1	30	7	2	20	1	10	1	1	1	1	2	1	87
40	2	59	1	3	164	55	1	3	3	23	0	1	6	30	7	1	1	0	0	0	0	0	0	0	0	0	0	0	4	7	1	0	7	1	0	7	1	0	3	0	0	1	1	1	1	1	92
41	2	67	1	4	163	55	3	3	1	22	0	1	6	30	8	0	0	0	0	0	0	0	0	0	0	0	0	0	1	0	0	0	0	0	0	7	1	0	5	0	0	1	1	1	1	1	93
42	2	71	1	3	164	64	2	3	3	22	0	4	6	0	6	3	0	3	0	0	0	0	2	2	2	0	0	0	1	0	0	0	0	0	0	7	1	0	4	0	1	1	1	1	1	1	73
43	2	66	1	4	160	60	3	3	3	22	0	3	6	0	7	2	2	2	0	0	0	0	0	0	1	2	0	0	3	0	0	0	0	0	0	5	1	0	0	0	1	1	1	1	1	1	83
44	2	69	1	4	167	61	1	3	3	22	0	1	6	30	6	0	1	1	0	0	0	0	0	0	0	0	0	0	1	0	0	0	0	0	0	7	1	20	3	0	0	1	1	1	1	1	87
45	2	61	1	2	160	80	1	3	3	22	0	3	6	30	7	2	0	3	2	3	0	2	0	2	1	0	0	0	4	0	0	0	0	0	0	7	1	0	3	0	1	1	1	1	2	1	80
46	2	65	1	3	157	55	1	3	3	22	0	2	6	0	7	0	0	1	0	1	0	0	0	0	0	0	0	0	1	0	0	0	0	0	0	7	2	30	3	0	1	1	1	1	1	1	100
47	2	74	1	1	163	63	1	3	3	20	0	2	6	0	7	0	3	3	0	0	0	0	0	3	1	0	0	1	1	0	0	0	0	0	0	0	0	0	3	0	0	1	1	1	2	1	65
48	2	73	1	4	155	60	2	3	3	22	0	4	6	0	7	3	3	3	0	3	0	0	1	0	3	0	3	3	3	0	0	0	0	0	0	7	1	0	7	0	1	4	1	1	1	1	55
49	2	72	1	2	163	69	1	3	3	21	0	3	7	0	7	3	3	0	0	0	0	0	0	0	2	0	2	1	3	0	0	0	7	1	30	7	3	0	3	0	1	1	1	1	1	1	85
50	2	78	1	4	140	59	1	3	3	22	30	4	6	0	5.5	3	2	3	0	0	0	0	0	3	2	0	0	0	4	0	0	0	7	0	30	0	0	0	6	0	1	4	1	4	5	1	60
51	2	75	1	4	150	52	1	3	3	22	30	1	6	30	7	0	0	0	2	0	0	0	0	0	1	0	0	0	1	0	0	0	7	1	30	7	1	30	2	30	0	1	1	1	1	1	81
52	2	75	1	1	155	70	1	3	2	21	0	2	6	0	5	0	0	2	0	0	0	0	0	0	1	0	0	0	1	0	0	0	0	0	0	7	1	0	6	30	1	1	1	1	1	1	81
53	2	59	1	4	153	50	2	3	3	21	0	1	6	0	8	0	0	0	0	0	0	0	0	0	0	0	0	0	4	0	0	0	7	1	0	0	0	0	0	0	0	1	1	1	1	1	80
54	2	69	1	3	160	55	1	3	2	22	0	1	5	30	7	0	0	1	0	0	0	0	0	0	0	0	0	0	4	1	1	0	1	1	0	7	1	30	3	0	0	1	1	1	1	1	90
55	2	64	2	4	160	50	2	3	3	23	0	2	7	0	8	0	1	2	0	0	0	0	0	0	0	0	0	0	4	7	2	30	6	1	0	6	2	20	5	0	1	1	1	1	1	1	82
56	2	72	1	3	160	74	1	3	3	21	30	1	6	30	7	0	0	0	0	0	0	0	0	0	1	0	0	0	1	0	0	0	6	1	30	2	0	0	3	10	0	1	1	1	1	1	81
57	2	72	1	2	160	72	1	3	2	21	30	2	6	30	6	1	3	3	0	0	0	0	2	0	1	0	0	0	1	0	0	0	0	0	0	7	1	0	5	0	1	1	1	1	1	1	86
58	2	68	1	4	160	60	1	3	3	22	0	1	6	0	7	0	1	3	1	3	0	0	0	0	0	0	0	0	1	0	0	0	0	0	0	7	1	0	3	0	1	1	1	1	2	1	80
59	2	67	1	4	159	52	2	3	3	23	0	4	8	0	6	3	0	0	3	0	0	0	0	0	1	0	0	0	4	0	0	0	0	0	0	0	0	0	4	30	0	1	1	1	1	1	78
60	2	66	1	3	163	74	1	3	3	22	0	2	6	0	8	0	1	0	0	0	0	0	0	0	1	0	3	0	1	0	0	0	0	0	0	7	1	30	1	30	0	1	1	1	1	1	90
61	2	64	1	4	160	60	2	3	3	22	0	1	7	0	8	0	0	0	0	0	0	0	0	0	0	0	0	0	1	1	2	0	3	1	30	7	2	30	3	10	0	1	1	1	1	1	90
62	2	70	1	2	153	51	1	3	3	23	0	1	6	30	7	0	0	0	0	0	0	0	0	0	0	0	0	0	1	0	0	0	7	1	30	7	1	30	5	0	0	1	1	1	1	1	100
63	2	74	1	3	160	55	1	3	3	22	0	2	6	0	6	1	2	3	0	0	0	0	1	0	1	0	0	0	1	0	0	0	7	1	0	7	2	0	5	0	0	1	1	1	1	1	80
64	2	64	1	4	167	70	2	3	2	22	0	2	6	0	6	0	0	2	0	0	2	1	1	1	1	1	0	0	3	2	2	0	0	0	0	2	1	0	6	0	0	1	1	1	1	1	86
65	2	65	1	4	167	75	2	3	3	22	0	4	7	30	7	3	2	3	0	3	0	0	0	3	1	0	0	0	4	0	0	0	0	0	0	7	1	0	6	0	1	1	1	1	1	1	86
66	2	66	1	3	155	57	1	3	3	22	0	2	6	30	6	2	1	2	0	0	0	0	1	0	2	0	0	0	4	0	0	0	0	0	0	5	2	0	2	0	0	1	1	1	1	1	81
67	2	74	1	4	158	71	2	3	3	22	30	1	5	30	6	0	0	3	0	0	0	0	0	0	1	0	0	0	1	0	0	0	0	0	0	0	0	0	2	0	0	1	1	1	1	1	88
68	2	71	1	3	156	65	1	3	3	22	0	1	6	0	8	0	0	0	0	0	0	0	0	0	0	0	0	0	1	0	0	0	0	0	0	7	2	0	2	30	1	1	1	1	1	1	60
69	2	66	1	3	160	60	1	3	3	22	0	2	5	0	6	0	0	0	0	0	0	0	0	0	0	0	0	0	1	0	0	0	0	0	0	7	2	0	2	30	1	1	1	1	1	1	80
70	2	77	1	2	160	55	1	3	2	21	10	2	6	30	9	0	0	0	0	0	0	0	0	0	0	2	0	0	1	2	2	10	1	2	30	7	2	10	5	10	0	1	1	1	1	1	100
71	2	58	1	2	150	50	1	3	2	21	0	3	5	0	6	3	0	0	0	0	0	0	0	0	2	0	0	0	1	0	0	0	7	1	0	0	0	0	0	0	1	1	1	1	1	1	65
72	2	72	1	4	160	61	2	3	3	22	0	1	5	0	6	0	3	3	0	0	0	0	0	0	1	0	0	0	4	0	0	0	0	0	0	0	0	0	5	0	1	1	1	1	1	1	73
73	2	70	1	3	168	73.5	2	3	3	22	0	2	7	0	8	0	3	3	0	0	0	0	0	0	1	0	0	0	4	0	0	0	0	0	0	7	0	30	0	20	1	1	1	1	1	1	80
74	2	83	1	1	163	65	1	3	3	20	0	2	5	30	8	0	0	0	0	2	0	0	0	0	0	0	0	0	3	0	0	0	7	1	0	7	1	0	0	0	1	1	1	1	1	1	81
75	2	70	1	3	156	67	1	3	3	22	30	3	6	30	7	0	0	0	0	0	0	0	0	0	1	0	0	0	1	0	0	0	5	1	30	7	1	30	3	20	1	1	1	1	1	1	84
76	2	79	1	3	157	56	1	3	3	22	0	1	7	0	8	0	0	1	0	0	0	0	0	0	0	0	0	0	1	0	0	0	0	0	0	6	1	0	5	0	0	1	1	1	1	1	60
77	2	63	1	3	159	48	2	3	3	21	0	2	5	30	6	0	0	2	0	0	0	0	0	0	1	0	0	0	3	0	0	0	7	3	0	0	0	0	0	0	1	1	1	1	1	1	81
78	2	70	1	4	158	57	3	3	3	23	0	2	6	30	7	3	3	3	3	3	0	0	0	0	2	0	0	1	4	0	0	0	0	0	0	0	0	0	5	0	1	1	1	1	2	1	66
79	2	80	1	3	157	54	3	3	3	22	10	2	6	30	6	0	2	2	0	0	0	0	0	0	2	2	0	0	4	1	1	10	2	1	10	6	1	20	2	30	1	1	1	1	1	1	88
80	2	73	1	2	162	70	1	3	3	20	0	1	6	0	8	0	2	0	0	0	0	0	0	0	0	0	0	0	1	0	0	0	0	0	0	0	0	0	0	0	1	1	1	1	2	1	60
81	2	80	1	2	156	54	2	3	1	23	0	4	7	0	7	0	2	3	0	0	2	0	0	0	0	0	0	0	4	0	0	0	0	0	0	7	0	40	0	30	1	1	1	1	1	1	77
82	2	78	1	2	154	50	1	3	2	22	0	2	6	0	6	1	2	2	0	0	0	2	2	1	1	0	0	0	3	0	0	0	0	0	0	7	2	0	5	0	0	1	1	1	1	1	88
83	2	71	1	2	166	70	1	3	2	21	0	4	6	0	7	2	3	3	0	0	0	0	1	2	1	0	2	1	4	0	0	0	0	0	0	0	0	0	4	0	0	1	1	2	2	2	80
84	2	69	1	3	162	62	1	3	2	22	0	1	6	0	6	0	0	0	0	0	0	0	0	0	0	0	0	0	1	0	0	0	0	0	0	7	1	30	3	10	0	1	1	1	1	1	88
85	2	62	1	2	158	70	1	3	3	22	0	1	6	20	6	0	0	0	0	0	0	0	0	0	0	0	0	0	1	0	0	0	1	1	30	7	1	30	3	30	0	1	1	1	1	1	78
86	2	68	1	2	158	56	1	3	3	22	0	3	6	0	5	0	3	3	0	0	0	0	0	0	1	0	0	0	4	0	0	0	7	2	0	7	0	0	2	0	0	1	1	1	1	1	85
87	2	62	1	2	160	55	1	3	3	21	0	2	6	30	5	1	1	1	0	0	0	0	0	0	1	0	0	0	4	0	0	0	0	0	0	7	2	0	5	0	0	1	1	1	1	1	84
88	2	68	1	4	172	92	2	3	2	21	30	1	6	30	7	0	0	0	0	0	0	0	0	0	0	0	0	0	3	0	0	0	5	1	30	0	0	0	3	0	0	1	1	1	1	1	91
89	2	65	1	4	155	62	2	3	2	22	30	4	7	30	6	3	0	0	0	0	0	0	3	0	1	0	0	0	4	0	0	0	0	0	0	7	1	0	4	0	1	1	1	1	1	1	91
90	2	66	1	3	158	56	1	3	3	21	20	3	5	0	8	0	0	0	0	0	0	0	0	0	1	0	0	0	4	0	0	0	7	1	0	7	0	40	1	0	1	1	1	1	2	2	92
91	2	72	1	2	158	55	1	3	1	23	0	2	7	0	5	1	0	0	0	0	0	0	1	0	2	1	0	0	1	0	0	0	5	1	0	7	1	0	5	0	0	1	1	1	1	1	60
92	2	92	1	1	160	70	1	3	3	21	0	2	7	0	6	1	1	1	0	1	0	0	0	0	1	0	0	0	1	0	0	0	0	0	0	7	0	20	6	0	0	2	1	2	1	1	79
93	2	70	1	2	158	50	1	3	3	22	0	2	5	0	5	1	1	1	0	0	0	0	0	0	1	0	0	0	4	0	0	0	0	0	0	7	2	0	5	0	0	1	1	1	1	1	85
94	2	56	1	3	168	60	1	3	3	21	30	1	6	30	7	0	0	0	0	0	0	0	0	0	1	0	0	0	1	0	0	0	7	1	30	7	1	30	3	10	0	1	1	1	1	1	82
95	2	63	1	3	159	62	1	3	3	21	30	1	6	0	7	0	2	1	0	2	1	1	0	1	1	0	0	1	2	2	2	40	7	1	0	7	1	0	3	0	1	1	1	1	1	1	83
96	2	63	1	3	158	60	1	3	2	21	30	2	6	0	7	0	2	2	0	2	0	0	0	0	1	0	0	0	1	0	0	0	7	1	0	0	0	0	0	0	0	1	1	1	1	1	80
97	2	63	1	3	158	62	1	3	3	21	30	1	6	0	6	0	1	1	0	0	0	0	0	0	0	0	0	0	2	0	0	0	0	0	0	7	1	0	3	0	0	1	1	1	1	1	84
98	2	59	1	4	173	72	3	3	3	22	30	2	6	0	8	0	1	1	0	0	0	0	0	0	0	0	0	0	3	0	0	0	0	0	0	7	1	0	1	30	0	1	1	1	1	1	80
99	2	75	1	2	156	62	1	3	3	23	0	2	4	30	5	1	2	2	0	1	0	0	0	0	1	0	0	0	4	0	0	0	0	0	0	7	1	0	5	0	0	1	1	1	1	1	82
100	2	75	1	2	158	58	1	3	3	23	0	2	4	30	4	1	1	1	0	1	0	0	0	0	1	0	2	0	4	0	0	0	0	0	0	7	2	0	5	0	0	1	1	1	1	1	85
101	2	75	1	2	156	60	1	3	3	21	30	1	6	30	7	0	0	0	0	0	0	0	0	0	1	0	0	0	1	0	0	0	6	1	30	7	1	30	1	20	0	1	1	1	1	1	76
102	2	75	1	2	156	67.5	1	3	3	22	0	2	4	0	6	0	2	1	0	0	0	0	0	0	0	0	0	0	4	0	0	0	7	2	0	2	2	0	2	0	0	1	1	1	1	1	100
103	2	68	1	3	155	52	1	3	1	21	30	2	7	0	6	1	3	3	0	0	0	0	0	0	1	0	0	0	4	0	0	0	0	0	0	7	0	30	5	0	0	1	1	1	1	1	85
104	2	80	2	2	159	60	1	3	3	21	0	3	7	0	6	1	1	1	0	0	0	0	1	0	1	0	0	0	4	0	0	0	0	0	0	0	0	0	3	0	1	1	1	1	2	1	85
105	2	58	1	4	156	49	2	3	3	22	30	3	5	30	7	2	1	3	0	0	0	0	0	0	1	0	0	0	4	1	1	0	1	1	0	0	0	0	2	30	0	1	1	1	1	1	81
106	2	68	1	2	162	60	2	3	3	26	0	4	8	0	5	3	3	3	0	0	0	0	3	0	2	0	0	0	4	0	0	0	0	0	0	7	2	0	4	0	1	1	1	1	1	1	85
107	2	71	2	4	169	75	2	3	1	22	30	1	7	30	9	0	0	0	0	0	0	0	0	0	0	0	0	0	1	0	0	0	7	3	0	0	0	0	4	0	0	1	1	1	1	1	95
108	2	53	1	2	159	58	1	3	3	22	0	2	5	30	7	3	3	3	0	0	0	0	0	0	1	0	0	0	4	0	0	0	0	0	0	0	0	0	4	0	0	1	1	1	1	1	77
109	2	71	1	2	160	65	1	3	3	22	0	1	7	20	8	0	0	0	0	0	0	0	0	0	0	0	0	0	1	0	0	0	5	3	30	4	3	0	1	20	0	1	1	1	1	1	77
110	2	67	1	1	159	67.5	1	3	1	21	30	2	6	30	7	0	0	3	0	0	0	0	0	1	0	0	0	1	4	0	0	0	0	0	0	7	1	0	5	0	0	1	1	1	1	1	88
111	2	61	1	4	175	75	2	3	1	21	30	3	6	30	8	2	0	0	0	0	0	0	0	0	0	0	0	0	1	0	0	0	7	2	30	7	0	0	3	0	1	1	1	1	1	1	86
112	2	58	1	4	158	60	1	3	3	22	0	1	6	0	8	0	0	0	0	0	0	0	0	0	0	0	0	0	1	0	0	0	7	2	10	7	1	30	2	30	0	1	1	1	1	1	86
113	2	66	1	4	167	61	1	3	3	23	0	1	7	30	8	2	0	3	0	3	0	1	1	0	1	0	0	0	4	0	0	0	0	0	0	0	0	0	5	0	1	1	1	1	1	1	88
114	2	73	1	4	166	50	2	3	3	21	10	3	6	30	7	0	0	0	0	0	0	0	0	0	1	0	0	0	1	0	0	0	7	1	30	7	1	30	2	20	1	1	1	1	1	1	73
115	2	69	1	2	158	60	1	3	2	21	30	3	6	30	7	0	0	0	0	0	0	0	0	0	1	0	0	0	1	0	0	0	7	2	30	7	1	30	3	20	0	1	1	1	1	1	84
116	2	68	1	4	165	60	1	3	3	21	30	2	7	0	6	2	1	1	0	0	0	0	0	0	1	0	0	0	4	0	0	0	0	0	0	7	1	0	5	0	1	1	1	1	1	1	79
117	2	68	1	2	155	57.5	1	3	2	22	0	1	8	0	9	0	0	3	0	0	0	0	0	0	0	0	0	0	1	0	0	0	0	0	0	7	1	30	8	30	1	1	1	1	1	1	100
118	2	64	1	2	162	57	2	3	3	21	0	2	6	0	7	1	1	1	0	0	0	0	0	0	1	0	0	0	1	0	0	0	0	0	0	7	2	0	4	0	0	1	1	1	1	1	90
119	2	62	2	3	159	58	1	3	3	21	0	1	6	0	7	0	3	3	0	3	0	0	0	0	1	0	0	0	4	0	0	0	0	0	0	0	0	0	4	0	0	1	1	1	3	1	61
120	2	60	1	4	159	50	1	3	2	22	0	3	7	0	6	1	1	1	0	0	0	0	0	0	1	0	0	0	4	0	0	0	7	2	0	7	2	0	4	0	0	1	1	1	1	1	95
121	2	73	1	2	150	60	1	3	1	23	0	1	7	30	8	0	1	0	0	0	0	0	0	0	1	0	0	0	3	7	1	0	7	1	0	7	1	0	5	0	1	1	1	1	1	1	87
122	2	68	1	4	158	55	2	3	2	22	0	1	6	0	6	0	3	3	0	0	0	0	0	0	1	0	0	0	1	0	0	0	0	0	0	0	0	0	1	30	0	1	1	1	1	1	77
123	2	67	1	3	150	50	1	3	3	22	0	1	6	30	7	0	2	0	0	0	0	0	0	0	1	0	0	0	4	0	0	0	0	0	0	0	0	0	5	0	1	1	1	1	1	1	73
124	2	67	1	4	160	70	1	3	3	22	0	2	4	0	6	2	2	2	0	3	0	0	0	0	1	0	0	0	4	0	0	0	7	2	30	7	1	0	4	0	1	1	1	1	2	1	70
125	2	77	1	2	160	55	1	3	3	21	0	2	6	0	6	3	3	1	0	0	0	0	0	0	1	0	0	0	1	0	0	0	0	0	0	7	1	0	5	0	1	1	1	1	1	1	81
126	2	73	1	1	153	65	2	3	1	22	0	2	6	30	7	0	0	1	0	0	0	0	0	0	0	0	3	0	4	0	0	0	7	2	0	7	2	0	7	0	0	1	1	1	1	1	87
127	2	72	2	2	158	59	1	3	3	22	0	1	6	0	7	0	0	1	0	0	0	0	0	0	0	0	3	0	1	0	0	0	7	4	0	7	1	0	4	0	1	1	1	1	1	1	75
128	2	70	1	2	154	64	3	3	3	21	0	1	5	0	8	0	2	2	0	0	0	0	0	0	1	0	0	0	1	0	0	0	7	2	0	0	0	0	2	0	0	1	1	1	1	1	57
129	2	70	1	3	160	65	1	3	3	22	0	1	6	0	6	0	0	0	0	0	0	0	0	0	0	0	0	0	1	0	0	0	0	0	0	7	0	0	3	30	0	1	1	1	1	1	87
130	2	69	1	4	164	56	2	3	1	22	30	2	6	30	7	2	0	0	0	0	0	2	0	0	1	0	0	0	4	0	0	0	7	1	0	7	1	0	7	0	1	1	1	1	1	1	100
131	2	68	1	4	156	48	1	3	3	22	0	3	5	30	5	2	2	0	0	0	0	0	0	0	1	0	0	0	1	0	0	0	6	1	30	5	1	30	3	20	0	1	1	1	1	1	84
132	2	68	1	3	160	68	2	3	1	21	0	4	4	0	5	3	3	3	0	0	0	0	0	0	2	0	0	0	1	0	0	0	0	0	0	7	1	30	4	0	0	1	1	1	1	1	81
133	2	67	1	3	154	49	1	3	3	22	0	1	6	0	6	0	0	1	0	0	0	0	0	0	0	0	0	0	4	0	0	0	0	0	0	7	4	0	6	0	0	1	1	1	1	1	80
134	2	67	1	3	170	65	3	3	2	21	30	1	5	30	8	0	0	0	0	0	0	0	0	0	0	0	0	0	1	0	0	0	0	0	0	0	0	0	2	0	0	1	1	1	1	1	100
135	2	67	1	3	168	65	1	3	3	21	30	3	6	30	7	0	0	0	0	0	0	0	0	0	1	0	0	0	1	0	0	0	5	1	30	5	1	30	2	30	0	1	1	1	1	1	78
136	2	67	1	3	166	68	1	3	3	20	0	2	6	0	7	0	0	0	0	0	0	0	0	0	0	0	0	0	3	0	0	0	0	0	0	0	0	0	1	0	1	1	1	1	2	2	50
137	2	67	1	2	150	51	1	3	3	21	40	4	6	0	6	3	2	3	0	0	0	0	0	0	2	0	3	0	3	0	0	0	7	1	0	7	1	0	1	0	1	1	1	1	1	1	85
138	2	66	1	3	166	70	1	3	3	22	0	1	6	30	6	0	0	1	0	0	0	0	0	0	0	0	0	0	2	0	0	0	0	0	0	7	1	0	3	30	0	1	1	1	1	1	90
139	2	65	2	4	160	50	1	3	2	22	0	2	5	0	6	3	2	1	0	0	0	2	0	2	1	0	0	0	4	0	0	0	0	0	0	1	1	0	6	0	1	1	1	1	2	2	84
140	2	64	1	2	160	55	1	3	2	22	0	3	5	0	7	2	2	2	2	2	2	2	2	2	1	1	1	1	2	1	1	0	1	3	0	5	1	0	1	0	1	1	1	1	1	1	80
141	2	64	1	3	153	65	1	3	1	22	0	2	5	0	5	1	0	0	0	2	0	0	0	0	1	0	0	0	1	0	0	0	0	0	0	7	2	0	5	0	1	1	1	1	1	1	85
142	2	64	1	3	159	68	1	3	2	21	20	3	6	0	6	1	1	1	0	0	0	0	0	0	0	0	0	0	4	0	0	0	0	0	0	0	0	0	3	0	1	1	1	1	1	1	88
143	2	64	1	3	168	61	3	3	3	21	30	4	6	30	4	3	3	3	0	0	3	0	3	3	3	3	0	1	4	0	0	0	7	0	30	0	0	0	8	0	1	2	2	2	2	2	60
144	2	63	1	3	152	72	2	3	1	22	30	2	6	0	6	1	0	1	0	0	0	0	0	0	1	0	0	0	2	0	0	0	7	1	0	0	0	0	0	0	1	1	1	1	1	1	70
145	2	63	2	3	161	60	1	3	3	26	0	4	8	0	5	3	0	0	0	3	0	1	0	0	1	0	0	0	4	0	0	0	0	0	0	7	1	0	5	0	0	1	1	1	1	1	98
146	2	60	1	2	150	45	1	3	3	22	0	2	4	30	5	2	2	2	0	2	0	0	0	0	1	0	0	0	4	0	0	0	0	0	0	7	1	30	5	0	1	1	1	1	1	1	82
147	2	60	1	4	169	60	2	3	3	21	0	1	7	30	7	1	2	2	0	0	0	0	0	0	0	0	0	0	4	0	0	0	7	1	0	7	1	0	3	0	0	1	1	1	1	1	90
148	2	59	1	4	160	55	2	3	1	22	0	1	6	0	7	0	1	1	0	3	0	0	0	0	0	0	0	0	4	0	0	0	0	0	0	7	2	0	5	0	1	1	1	1	2	1	87
149	2	59	1	3	160	55	1	3	1	21	0	2	4	30	5	1	0	0	0	0	0	0	0	0	1	0	0	0	4	0	0	0	0	0	0	7	2	0	5	0	0	1	1	1	1	1	82
150	2	59	1	4	160	70	1	3	3	21	0	1	6	0	8	1	0	2	0	0	0	0	0	0	1	0	0	0	4	0	0	0	0	0	0	7	1	0	1	0	1	1	1	1	1	1	97
151	2	58	2	4	156	60	1	3	3	22	0	1	6	0	7	0	0	0	0	0	0	0	0	0	0	0	0	0	4	1	1	10	2	1	23	7	2	23	2	10	0	1	1	1	1	1	94
152	2	57	1	4	160	60	1	3	1	21	0	1	6	0	5	0	0	1	0	0	0	0	0	0	0	0	0	0	1	0	0	0	7	3	0	5	4	30	1	30	1	2	1	2	2	1	80
153	2	68	1	3	162	70	2	3	3	22	0	2	5	0	6	0	0	3	0	3	3	0	0	0	0	0	0	0	4	1	1	0	6	1	0	7	2	0	4	0	0	1	1	1	1	1	95
154	2	59	1	3	160	60	1	3	1	22	0	2	6	0	6	1	2	2	0	0	0	0	0	0	1	0	0	0	1	0	0	0	0	0	0	7	1	30	5	0	0	1	1	1	1	1	72
155	2	81	1	3	146	50	1	3	3	21	0	4	5	0	6	0	0	0	0	0	0	0	0	1	2	0	0	0	1	0	0	0	0	0	0	7	1	0	4	0	1	1	1	1	1	1	82
156	2	74	1	1	156	70	1	3	3	21	30	4	5	0	7	3	3	3	0	0	0	0	0	0	0	0	0	2	1	0	0	0	0	0	0	0	0	0	0	0	1	1	1	1	2	2	87
157	2	68	1	2	161	60	1	3	1	22	0	1	5	0	7	0	0	1	0	0	0	0	0	0	0	0	0	0	1	0	0	0	1	1	30	7	1	0	3	30	0	1	1	1	1	1	81
158	2	68	1	2	160	60	1	3	2	21	30	1	6	30	8	0	0	0	0	0	0	0	0	0	1	0	0	0	1	0	0	0	7	1	30	7	2	30	2	30	0	1	1	1	1	1	86
159	2	71	1	2	165	63	1	3	3	22	0	1	6	0	7	0	0	3	0	0	0	0	0	2	0	0	0	0	4	0	0	0	0	0	0	7	1	30	6	0	0	1	1	1	1	1	100
160	2	74	1	4	164	52	2	3	2	22	0	1	7	30	8	0	0	0	0	0	0	0	3	3	0	0	0	0	1	0	0	0	7	2	30	7	2	0	3	0	0	1	1	1	1	1	70
161	2	56	1	3	162	60	1	3	3	21	30	1	5	30	7	0	2	2	0	0	0	0	0	0	1	0	0	0	4	1	1	20	1	1	10	6	2	10	2	20	0	1	1	1	1	1	87
162	2	71	1	3	160	63	1	3	1	21	30	1	5	30	8	0	0	0	0	0	0	0	0	0	0	0	0	0	2	7	1	30	0	0	0	0	0	0	2	0	0	1	1	1	1	1	100
163	2	70	1	4	165	50	2	3	3	22	0	2	6	0	8	1	1	0	0	0	0	0	0	0	0	0	0	0	1	0	0	0	0	0	0	0	0	0	2	0	0	1	1	1	1	1	82
164	2	77	1	1	160	60	1	3	3	21	0	1	6	0	6	0	1	1	0	0	0	0	0	0	1	0	0	0	1	0	0	0	0	0	0	7	0	49	3	30	0	1	1	1	1	1	84
165	2	70	2	3	165	45	2	3	3	22	15	1	3	0	3	3	3	3	0	0	0	0	0	0	3	3	3	1	1	0	0	0	0	0	0	7	2	0	2	0	0	3	1	3	3	1	50
166	2	72	1	3	156	53	1	3	3	22	0	2	5	0	7	0	0	0	0	0	0	0	0	0	0	0	0	0	1	0	0	0	0	0	0	7	2	0	2	0	1	1	1	1	1	1	88
167	2	75	1	3	168	68	1	3	3	23	0	1	7	0	8	0	0	3	0	0	0	0	0	0	0	0	0	0	4	0	0	0	0	0	0	7	1	0	6	0	0	1	1	1	1	1	83
168	2	72	1	2	155	56	1	3	3	21	30	3	6	30	8	0	0	0	0	0	0	0	0	0	0	0	0	0	1	0	0	0	7	2	0	7	1	0	3	0	0	1	1	1	1	1	85
169	2	70	1	2	158	60	1	3	1	21	30	2	5	10	7	2	0	0	0	0	0	0	0	0	0	0	0	0	1	1	1	20	1	1	20	7	1	20	2	30	0	1	1	1	1	1	87
170	2	66	1	2	158	53	1	3	1	22	10	1	6	30	7	0	0	0	0	0	0	0	0	0	1	0	0	0	1	1	1	30	6	1	30	6	1	30	1	20	0	1	1	1	1	1	91
171	2	60	1	3	158	62	1	3	3	23	0	1	5	0	6	0	2	0	0	2	0	0	0	0	1	0	0	0	3	0	0	0	0	0	0	7	1	0	5	0	0	1	1	1	1	1	83
172	2	58	2	3	164	59	1	3	3	21	0	2	6	30	6	0	0	2	0	0	0	0	0	0	1	0	1	0	3	0	0	0	0	0	0	7	1	0	5	0	0	1	1	1	2	1	88
173	2	74	1	2	156	60	1	3	3	21	30	1	6	20	7	0	0	0	0	0	0	0	0	0	1	0	0	0	1	0	0	0	7	1	30	7	1	30	2	30	0	1	1	1	2	1	84
174	2	74	1	2	156	60	1	3	3	21	30	1	6	0	6	0	1	1	0	0	0	0	0	0	0	0	0	0	2	0	0	0	0	0	0	7	1	30	3	30	1	1	1	1	1	1	89
175	2	72	1	2	154	70	1	3	3	22	0	1	5	0	6	0	1	1	0	0	0	0	0	0	0	0	0	0	1	0	0	0	0	0	0	0	0	0	3	0	1	1	1	1	2	1	60
176	2	62	1	3	158	60	1	3	1	22	0	1	6	0	6	0	1	3	1	0	0	0	0	0	0	0	0	0	4	2	2	30	6	2	3	6	3	2	3	0	0	1	1	1	1	1	92
177	2	62	1	3	158	60	1	3	3	22	30	3	6	30	7	0	0	0	0	0	0	0	0	0	1	0	0	0	1	0	0	0	6	1	30	7	1	30	3	20	0	1	1	1	1	1	88
178	2	69	1	1	169	65	1	3	3	21	0	4	6	30	6	1	2	2	0	0	0	0	0	0	2	0	0	0	1	0	0	0	0	0	0	7	1	0	1	0	1	1	1	1	1	1	87
179	2	77	1	4	156	60	2	3	2	22	0	1	6	0	7	0	0	0	0	0	0	0	0	0	1	0	0	0	2	1	1	0	5	1	0	6	1	0	2	0	0	1	1	1	1	1	98
180	2	74	1	4	157	60	3	3	3	21	0	1	5	30	8	0	2	2	0	0	0	0	0	0	0	0	3	0	4	0	0	0	0	0	0	7	1	0	2	0	1	1	1	1	1	1	81
181	2	69	2	4	163	53	1	3	3	22	0	3	7	0	6	2	2	1	0	0	0	0	0	0	1	0	0	0	3	0	0	0	7	2	30	7	2	0	3	0	0	1	1	1	1	1	83
182	2	68	1	3	160	65	1	3	3	22	0	2	5	30	6	1	2	2	0	0	0	0	0	0	1	0	0	0	1	0	0	0	0	0	0	7	2	0	5	0	0	1	1	1	1	1	86
183	2	63	1	3	167	65	2	3	3	21	0	1	5	0	7	0	0	0	0	3	0	0	2	0	0	0	0	0	4	0	0	0	7	1	0	7	2	0	4	0	1	1	1	1	1	1	90
184	2	88	1	1	155	50	1	3	2	21	30	3	6	30	7	0	0	0	0	0	0	0	0	0	1	0	0	0	1	0	0	0	7	1	20	7	1	30	2	30	0	1	1	1	1	1	76
185	2	79	1	4	154	56	2	3	1	22	0	2	6	0	8	0	1	1	0	0	0	0	0	0	0	0	0	0	1	7	2	0	7	2	0	7	2	0	4	0	1	1	2	1	1	1	80
186	2	76	1	2	152	65	1	3	3	22	0	1	6	0	6	0	1	2	0	0	0	0	0	0	0	0	0	0	1	0	0	0	0	0	0	7	0	45	3	0	0	1	1	1	1	1	91
187	2	74	1	4	161	57	2	3	2	21	0	2	4	0	5	2	2	2	0	0	0	0	0	0	1	0	0	0	1	0	0	0	0	0	0	7	2	0	3	0	0	1	1	1	1	1	87
188	2	74	1	1	159	60	1	3	3	22	0	1	6	0	7	0	0	1	0	0	0	0	0	0	1	0	0	0	1	0	0	0	0	0	0	7	1	0	3	0	0	1	1	1	1	1	84
189	2	74	1	1	160	60	1	3	3	22	0	1	6	0	6	0	1	1	0	0	0	0	0	0	0	0	0	0	2	0	0	0	0	0	0	7	1	30	3	30	0	1	1	1	1	1	90
190	2	72	1	4	165	80	2	3	3	22	0	1	7	0	8	0	0	0	0	0	0	0	0	0	0	0	0	0	3	0	0	0	7	1	0	0	0	0	0	0	0	1	1	1	1	1	85
191	2	71	1	2	150	50	1	3	2	21	30	1	6	30	8	0	0	0	0	0	0	0	0	0	0	0	0	0	1	0	0	0	7	2	30	7	2	20	3	20	0	1	1	1	1	1	83
192	2	70	1	2	160	59	1	3	3	22	0	2	5	30	6	0	3	3	0	3	0	0	0	0	1	0	0	0	4	0	0	0	7	2	0	0	0	0	4	30	1	1	1	1	1	1	80
193	2	70	1	4	161	60	2	3	3	21	0	1	6	0	8	0	0	0	0	0	0	0	0	0	0	0	0	0	2	0	0	0	0	0	0	7	2	0	2	0	0	1	1	1	1	1	93
194	2	70	1	4	165	75	2	3	3	22	0	3	7	0	8	0	2	2	0	0	0	0	1	3	2	0	0	0	1	0	0	0	0	0	0	7	0	40	4	0	0	1	1	1	2	1	75
195	2	68	1	2	167	60	1	3	3	22	0	3	5	0	5	1	3	3	0	0	0	0	0	0	2	0	0	0	4	0	0	0	0	0	0	0	0	0	1	30	0	1	1	1	1	1	62
196	2	68	1	3	166	65	1	3	3	21	30	1	5	0	5	0	3	3	0	3	0	0	0	0	2	1	0	1	4	0	0	0	7	0	30	0	0	0	1	0	1	1	1	1	2	1	60
197	2	64	1	3	166	65	1	3	2	23	0	2	6	0	6	1	1	1	0	0	0	0	0	0	1	0	0	0	4	0	0	0	0	0	0	7	1	0	5	0	1	1	1	1	1	1	83
198	2	60	1	4	160	53	3	3	3	21	0	2	5	0	7	2	2	1	0	0	0	0	1	0	2	0	0	0	2	0	0	0	7	2	0	0	0	0	0	0	0	1	1	1	1	1	63
199	2	59	1	2	163	55	1	3	3	21	30	2	7	30	8	0	0	0	0	0	0	0	0	0	1	0	0	0	3	7	2	0	7	2	0	7	1	0	2	0	0	1	1	1	1	1	70
200	2	59	1	4	166	70	1	3	3	21	0	2	5	0	6	1	1	1	0	0	0	0	0	0	1	0	2	0	4	0	0	0	0	0	0	7	1	0	5	0	1	1	1	1	1	1	83
201	2	58	1	4	160	61	1	3	3	21	0	1	7	0	10	0	0	0	0	0	0	0	0	0	0	0	0	0	2	7	3	0	7	3	0	7	2	0	4	0	0	1	1	1	1	1	90
202	2	58	1	3	165	70	1	3	2	22	0	2	5	0	6	0	1	1	0	0	0	0	0	0	0	0	0	0	2	0	0	0	5	2	0	7	2	0	2	0	0	1	1	1	1	1	81
203	2	82	1	4	158	57.5	3	3	3	21	0	1	6	0	8	0	0	2	0	0	0	0	0	0	0	0	2	0	2	0	0	0	0	0	0	7	0	30	2	0	0	1	1	1	1	1	73
204	2	80	1	2	164	60	1	3	3	20	30	2	5	30	8	0	2	0	0	0	0	0	0	0	1	0	0	0	1	1	1	10	5	1	20	5	1	30	2	30	0	1	1	1	1	1	87
205	2	75	1	2	160	60	1	3	2	22	0	3	7	0	6	0	0	0	0	0	0	0	0	0	1	0	0	0	1	0	0	0	5	1	30	5	1	30	2	30	0	1	1	1	1	1	87
206	2	71	1	2	159	54	2	3	1	22	0	3	5	30	6	3	3	3	0	0	0	0	0	0	2	1	0	0	1	0	0	0	7	1	0	0	0	0	0	0	1	1	1	1	1	1	68
207	2	69	1	2	170	65	1	3	2	22	0	1	6	0	6	0	0	0	0	0	0	0	0	0	0	0	0	0	2	1	1	0	0	0	0	7	1	30	3	0	0	1	1	1	1	1	87
208	2	68	1	3	158	45	1	3	3	21	30	2	6	0	5	1	0	0	0	2	0	0	1	0	1	0	0	0	4	0	0	0	0	0	0	7	2	0	5	0	1	1	1	1	1	1	78
209	2	68	1	4	167	65	2	3	3	21	30	1	6	30	7	0	0	0	0	0	0	0	0	0	1	0	0	0	1	0	0	0	5	1	30	5	1	30	3	20	0	1	1	1	1	1	78
210	2	67	2	2	157	70	1	3	3	21	30	1	6	0	7	0	0	0	0	0	0	0	0	1	1	0	2	0	4	0	0	0	0	0	0	7	2	0	1	0	1	1	1	1	1	1	96
211	2	63	1	4	165	69	2	3	3	23	0	4	4	0	5	2	3	3	0	0	0	0	0	0	2	0	0	0	2	0	0	0	0	0	0	7	2	0	4	30	0	1	1	1	1	1	82
212	2	63	2	2	159.5	51	1	3	3	21	30	1	6	30	6	0	0	0	0	0	0	0	0	0	0	0	0	0	2	0	0	0	0	0	0	7	1	30	3	30	0	1	1	1	1	1	84
213	2	63	1	2	159	52	1	3	2	22	10	1	6	30	8	0	0	0	0	0	0	0	0	0	1	0	0	0	1	0	0	0	7	1	30	7	1	30	3	20	0	1	1	1	1	1	86
214	2	61	1	3	158	62	1	3	3	22	0	1	7	0	6	0	1	1	0	0	0	0	0	0	0	0	0	0	2	0	0	0	0	0	0	7	1	30	3	0	0	1	1	1	1	1	89
215	2	59	1	3	158	54	1	3	3	21	30	3	7	10	8	0	0	0	0	0	0	0	0	0	0	0	0	0	1	0	0	0	7	1	30	6	1	30	3	10	0	1	1	1	1	1	81
216	2	79	1	2	155	75	2	3	3	22	0	2	7	0	8	0	0	3	0	0	0	2	0	0	0	0	0	0	1	2	1	0	0	0	0	0	0	0	1	0	0	1	1	1	1	1	89
217	2	75	1	2	150	65	1	3	3	21	30	2	7	0	5	3	2	2	0	0	0	0	0	0	1	0	0	0	3	0	0	0	0	0	0	7	0	30	5	0	1	2	1	1	1	1	78
218	2	71	2	4	150	52	2	3	3	21	0	2	4	0	6	1	1	1	0	0	0	0	0	0	1	0	3	0	4	0	0	0	7	1	0	7	2	0	2	0	1	1	1	1	1	1	85
219	2	71	1	4	158	57	2	3	3	22	30	2	5	0	7	0	2	2	0	0	0	0	0	0	0	0	0	0	1	0	0	0	0	0	0	3	0	30	0	30	1	1	1	1	3	1	89
220	2	70	2	4	156	50	1	3	1	21	0	1	6	0	8	0	2	2	0	0	0	0	2	0	1	0	0	0	1	0	0	0	7	1	0	0	0	0	0	0	1	1	1	1	1	1	60
221	2	68	1	2	160	70	1	3	3	21	30	1	6	30	6	0	0	0	0	0	0	0	0	0	1	0	0	0	1	0	0	0	7	1	30	7	1	30	2	30	1	1	1	1	1	1	77
222	2	68	1	2	168	80	2	3	3	20	0	1	3	0	7	0	3	3	0	3	0	0	0	0	1	0	0	0	1	0	0	0	0	0	0	0	0	0	2	0	0	1	1	1	1	1	75
223	2	68	1	2	150	56	2	3	2	20	30	2	5	30	7	1	0	2	0	0	0	0	0	0	1	0	0	0	3	0	0	0	7	1	0	0	0	0	0	0	1	1	1	1	1	1	83
224	2	66	1	2	162	65	1	3	3	21	0	1	6	0	7	0	0	1	0	0	0	0	0	0	0	0	0	0	2	0	0	0	0	0	0	7	1	30	3	40	0	1	1	1	1	1	78
225	2	63	1	3	152	63	1	3	3	22	0	1	6	0	7	0	0	0	0	3	0	0	3	0	0	0	0	0	3	0	0	0	0	0	0	7	1	0	5	0	1	1	1	1	1	1	74
226	2	56	1	4	162	55	2	3	3	21	30	3	7	0	6	0	0	0	0	0	0	0	0	0	1	3	0	0	4	0	0	0	7	2	30	0	0	0	1	0	1	1	1	1	1	1	81
227	2	76	1	4	164	70	1	3	2	22	30	1	6	30	8	0	1	1	0	0	0	0	0	0	0	0	0	0	2	7	1	0	7	1	0	7	1	0	4	0	0	1	1	1	1	1	84
228	2	75	2	3	164	65	2	3	3	22	30	1	3	3	5	0	3	1	0	0	0	0	0	0	2	3	0	0	3	0	0	0	7	1	30	1	0	0	0	0	0	1	1	1	1	1	100
229	2	74	1	2	158	60	2	3	3	21	0	2	5	0	4	3	3	3	0	3	0	0	0	0	2	0	0	1	1	0	0	0	0	0	0	0	0	0	2	0	0	1	1	1	1	1	79
230	2	73	1	2	150	45	1	3	3	22	0	2	5	0	6	1	0	0	0	0	0	0	0	0	1	0	0	0	4	0	0	0	0	0	0	7	0	30	5	0	1	1	1	1	1	1	79
231	2	68	1	2	161	62	1	3	3	21	0	1	6	20	7	0	3	3	0	0	0	0	0	0	1	0	0	0	1	0	0	0	0	0	0	0	0	0	2	30	0	1	1	1	2	2	60
232	2	67	1	3	161	55	1	3	2	22	0	3	7	0	9	1	0	0	0	0	0	0	0	2	2	1	0	0	4	0	0	0	0	0	0	7	1	0	1	0	1	1	1	1	1	1	88
233	2	67	1	3	160	59	1	3	3	21	0	1	5	30	7	1	1	1	0	0	0	0	0	0	1	0	3	0	1	0	0	0	7	2	0	7	2	0	2	0	1	1	1	1	1	1	83
234	2	66	1	3	164	64	1	3	3	22	0	3	5	0	7	1	1	0	0	0	0	0	0	0	1	1	0	0	4	7	1	30	5	1	30	7	1	30	2	0	0	1	1	1	1	1	81
235	2	77	1	4	162	62	2	3	1	21	30	1	5	30	6	0	1	2	0	0	0	0	0	0	1	0	0	0	1	0	0	0	0	0	0	2	1	30	3	0	0	1	1	1	1	1	79
236	2	74	1	4	164	65	2	3	3	22	0	1	6	0	7	0	0	1	0	0	0	0	0	0	0	0	0	0	1	1	1	0	0	0	0	7	1	30	3	30	0	1	1	1	1	1	89
237	2	69	1	3	159	50	2	3	3	22	15	3	4	30	5	3	3	2	0	3	0	0	1	3	1	1	0	0	3	0	0	0	0	0	0	5	0	40	2	0	1	2	2	1	2	1	88
238	2	68	1	3	160	50	1	3	3	21	0	2	5	0	5	2	1	1	0	0	0	0	0	0	1	0	0	0	4	0	0	0	0	0	0	7	1	30	5	0	0	1	1	1	1	1	78
239	2	65	1	3	159	60	2	3	2	24	0	4	7	0	6	3	0	2	0	1	0	0	1	0	1	1	0	0	4	0	0	0	0	0	0	0	0	0	5	0	1	2	1	2	2	3	48
240	2	62	1	3	159	65	3	3	3	20	30	3	6	30	7	0	3	3	0	0	0	0	0	0	1	0	0	0	4	0	0	0	7	1	30	7	1	30	1	0	1	1	1	1	1	1	82
241	2	57	1	3	160	52	1	3	3	21	30	1	5	30	8	0	3	3	0	0	0	0	0	0	1	0	0	0	1	0	0	0	0	0	0	0	0	0	3	0	0	1	1	1	1	1	84
242	2	69	1	2	165	65	1	3	3	22	0	3	3	0	5	3	3	3	0	0	0	0	0	0	3	3	3	0	1	0	0	0	7	1	0	0	0	0	3	0	1	1	1	1	2	3	60
243	2	69	1	4	163	60	1	3	3	21	30	1	6	30	8	0	0	0	0	0	0	0	0	0	1	0	0	0	1	0	0	0	6	1	30	7	1	30	2	20	0	1	1	1	1	1	87
244	2	68	1	2	154	60	1	3	3	20	30	2	5	30	8	0	0	3	0	0	0	0	0	0	0	0	1	0	4	7	3	0	7	3	0	7	3	0	8	0	0	1	1	1	1	1	100
245	2	66	1	3	160	60	1	3	3	21	30	1	6	30	7	0	0	0	0	0	0	0	0	0	0	2	0	0	3	0	0	0	7	1	30	7	1	30	3	20	0	1	1	1	1	1	87
246	2	66	1	3	160	60	1	3	3	21	30	2	6	30	8	0	0	0	0	0	0	0	0	0	1	0	0	0	1	0	0	0	5	3	20	5	1	30	3	10	0	1	1	1	1	1	86
247	2	58	1	3	160	54	2	3	3	21	30	2	6	30	8	0	0	0	0	0	0	0	0	0	1	0	0	0	2	1	1	20	6	1	30	6	2	10	1	20	0	1	1	1	1	1	85
248	2	86	2	2	158	57	2	3	1	21	0	4	6	30	6	3	2	2	0	0	0	0	0	0	1	1	0	0	1	0	0	0	0	0	0	0	0	0	3	0	1	1	1	1	2	1	85
249	2	75	1	2	156	60	1	3	1	22	0	2	7	0	6	1	3	3	0	0	0	0	0	0	2	0	0	0	4	0	0	0	0	0	0	7	0	40	6	0	1	1	1	1	1	1	86
250	2	74	1	2	166	55	1	3	3	21	0	2	6	0	6	0	1	1	0	3	0	0	0	0	1	0	0	0	4	0	0	0	0	0	0	7	1	30	5	0	1	1	1	1	1	1	80
251	2	67	1	2	165	56	1	3	3	22	0	2	7	0	7	0	0	0	0	0	0	0	0	0	0	0	0	0	1	0	0	0	3	1	30	6	2	30	1	30	0	1	1	1	1	1	86
252	2	66	1	3	165	52	1	3	3	21	0	2	5	0	8	0	3	3	0	3	0	0	0	0	1	0	0	0	1	7	1	0	7	1	0	7	1	0	7	0	0	1	1	1	1	1	100
253	2	64	1	3	150	60	2	3	2	21	30	2	6	20	8	0	0	0	0	0	0	0	0	0	0	0	0	0	1	0	0	0	7	3	10	7	2	30	3	0	0	1	1	1	1	1	83
254	2	64	1	3	150	60	1	3	3	22	0	2	5	0	6	0	0	1	0	0	0	0	0	0	1	0	0	0	4	0	0	0	0	0	0	7	1	30	6	0	0	1	1	1	1	1	86
255	2	64	1	3	156	75	1	3	3	21	0	2	6	30	6	1	2	2	0	0	2	0	3	0	1	0	0	0	1	0	0	0	0	0	0	7	1	30	5	0	1	1	1	1	1	1	84
256	2	64	1	3	156	75	1	3	3	22	0	2	6	0	6	0	2	2	0	0	0	0	0	0	1	0	0	0	1	0	0	0	0	0	0	7	1	30	5	0	0	1	1	1	1	1	84
257	2	57	1	3	160	68	2	3	3	21	30	1	6	0	7	0	1	1	0	0	0	0	0	0	1	0	0	0	3	1	2	0	1	2	0	1	2	0	4	0	0	1	1	1	1	1	95
258	2	73	1	2	159	56	1	3	3	22	0	2	5	0	5	0	1	1	0	0	0	0	0	0	1	0	0	0	1	0	0	0	0	0	0	7	3	0	2	20	0	1	1	1	1	1	80
259	2	62	1	4	163	62	2	3	3	21	30	1	5	0	8	1	2	0	0	3	2	0	0	0	1	0	0	1	3	0	0	0	0	0	0	0	0	0	5	30	0	1	1	1	1	1	85
260	2	68	1	3	157	60	1	3	3	22	10	2	6	30	6	2	0	2	0	0	0	0	0	2	1	0	0	0	1	1	1	20	2	1	20	7	1	20	3	30	1	1	1	1	1	1	92
261	2	68	1	2	160	60	1	3	3	22	0	3	6	30	7	0	0	0	0	0	0	0	0	0	1	0	0	0	1	0	0	0	7	1	30	6	1	30	2	30	0	1	1	1	1	1	81
262	2	73	1	2	148	60	1	3	2	21	30	1	7	0	6	0	1	1	0	0	0	0	0	0	1	0	0	0	2	0	0	0	0	0	0	7	1	30	3	30	0	1	1	1	1	1	92
263	2	62	1	3	160	65	1	3	1	21	0	1	5	0	8	0	0	0	0	0	0	0	0	0	0	0	0	0	1	0	0	0	0	0	0	0	0	0	5	0	0	1	1	1	1	1	92
264	2	69	1	2	160	65	1	3	3	21	0	2	6	0	8	0	1	1	2	2	0	1	1	0	1	0	0	0	3	0	0	0	7	1	0	7	1	0	5	0	0	1	1	1	1	1	90
265	2	83	1	3	150	55	1	3	3	21	45	1	6	30	7.5	0	0	3	0	0	0	3	0	0	1	0	0	0	1	0	0	0	0	0	0	0	0	0	8	0	1	1	1	1	3	3	70
266	2	72	1	2	160	50	1	3	3	21	0	2	4	0	6	1	0	1	0	0	0	0	2	0	0	0	0	0	4	0	0	0	0	0	0	5	1	0	5	0	1	1	1	1	1	1	81
267	2	68	1	3	154	50	1	3	3	22	0	1	7	0	8	0	0	0	0	0	0	0	0	0	0	0	0	0	1	0	0	0	0	0	0	7	1	0	5	0	0	1	1	1	1	1	90
268	2	60	1	4	163	62	1	3	3	22	0	1	6	20	6	0	1	0	0	0	0	0	0	0	0	0	0	0	4	0	0	0	0	0	0	7	1	30	3	0	0	1	1	1	1	1	87
269	2	69	1	4	165	63	2	3	3	21	0	1	7	0	8	0	0	0	0	0	0	0	0	0	0	0	0	0	1	0	0	0	7	2	0	0	0	0	0	0	0	1	1	1	1	1	81
270	2	63	2	3	155	60	1	3	2	21	30	3	6	30	7	0	0	0	2	0	0	0	0	0	1	0	0	0	1	0	0	0	6	1	30	7	1	30	2	30	0	1	1	1	1	1	77
271	2	70	1	2	160	61	1	3	3	21	30	2	6	10	8	0	0	0	0	0	0	0	0	0	1	0	0	0	4	1	1	10	5	1	30	5	1	30	2	10	0	1	1	1	1	1	90
272	2	64	1	3	165	72	1	3	3	22	0	2	6	0	7	1	2	2	0	0	0	0	2	0	1	0	0	0	4	0	0	0	0	0	0	7	2	0	5	0	1	1	1	1	1	1	82
273	2	64	1	3	165	73	1	3	3	21	30	1	6	30	8	0	0	0	0	0	0	0	0	0	0	0	0	0	1	0	0	0	7	1	0	7	2	0	3	0	0	1	1	1	1	1	88
274	2	64	1	3	166	72	2	3	3	19	0	1	6	0	6	0	0	0	0	0	0	0	0	0	0	0	0	0	1	0	0	0	0	0	0	7	2	0	2	0	1	1	1	1	1	1	83
275	2	89	1	1	155	50	1	3	2	21	30	1	6	30	7	0	0	0	0	0	0	0	0	0	1	0	0	0	1	0	0	0	5	1	30	5	1	30	3	20	0	1	1	1	1	1	88
276	2	68	1	3	153	60	1	3	3	22	0	1	6	0	7	0	0	0	0	0	0	0	0	0	0	0	0	0	1	0	0	0	1	1	0	7	1	0	2	10	0	1	1	1	1	1	81
277	2	50	1	3	160	50	1	3	1	21	30	1	6	0	6	0	0	0	0	0	0	0	0	0	0	0	0	0	1	0	0	0	0	0	0	7	1	30	3	0	0	1	1	1	1	1	87
278	2	65	1	3	150	50	1	3	3	21	30	2	6	30	8	0	0	0	0	0	0	0	0	0	0	0	0	0	1	0	0	0	7	1	30	7	1	30	2	30	0	1	1	1	1	1	87
279	2	66	1	1	159	72	1	3	3	20	0	2	4	0	6	1	0	1	0	0	0	0	0	0	1	0	3	0	4	0	0	0	0	0	0	7	2	0	2	0	0	1	1	1	1	1	80
280	2	73	1	2	155	60	1	3	1	20	20	2	5	30	7	0	0	0	0	0	0	0	0	0	1	0	0	0	1	0	0	0	6	1	30	7	1	30	3	30	1	1	1	1	1	1	72
281	2	71	1	2	168	65	1	3	3	22	0	1	6	30	6	0	1	1	0	0	0	0	0	0	0	0	0	0	1	0	0	0	1	0	0	7	1	30	3	0	0	1	1	1	1	1	83
282	2	79	1	4	164	63	2	3	3	21	30	2	6	0	7	0	3	0	0	0	0	0	0	2	1	0	0	0	4	0	0	0	7	1	0	7	1	30	4	0	1	1	1	1	1	1	96
283	2	67	1	3	175	60	1	3	3	21	30	1	6	30	7	0	0	0	0	0	0	0	0	0	1	0	0	0	1	0	0	0	5	1	30	6	1	30	2	30	0	1	1	1	1	1	84
284	2	67	1	3	165	80	1	3	3	22	30	2	6	30	7	0	0	0	0	0	0	0	0	0	1	0	0	0	1	0	0	0	7	1	30	7	1	30	2	10	0	1	1	1	1	1	76
285	2	71	1	3	160	55.5	2	3	2	20	30	2	5	30	7	2	3	3	0	0	0	0	1	0	2	0	0	0	1	0	0	0	0	0	0	0	0	0	1	0	1	1	1	1	1	1	60
286	2	70	1	4	160	60	1	3	3	21	0	1	5	0	6	1	1	1	0	0	0	0	0	0	0	0	0	0	1	0	0	0	1	1	0	7	1	0	3	45	0	1	1	1	1	1	73
287	2	69	1	2	160	65	1	3	3	21	30	1	7	0	6	0	0	0	0	0	0	0	0	0	0	0	0	0	1	0	0	0	0	0	0	7	1	30	3	30	0	1	1	1	1	1	91
288	2	69	1	3	157	60	1	3	2	21	30	3	6	30	7	0	0	0	0	0	0	0	0	0	1	0	0	0	1	0	0	0	6	1	30	7	1	30	3	10	0	1	1	1	1	1	86
289	2	68	1	3	160	70	1	3	3	21	30	3	6	30	7	0	0	0	0	0	0	0	0	0	1	0	0	0	1	0	0	0	7	1	30	7	1	30	3	20	0	1	1	1	1	1	86
290	2	59	1	3	162	60	1	3	3	21	30	1	6	20	3	0	0	0	0	0	0	0	0	0	1	0	0	0	1	0	0	0	7	1	30	7	1	30	2	30	0	1	1	1	1	1	76
291	2	72	1	1	150	50	1	3	1	21	30	1	6	30	7	0	0	0	0	0	0	0	0	0	1	0	0	0	1	0	0	0	5	1	30	7	1	30	2	30	0	1	1	1	1	1	90
292	2	69	1	4	150	50	1	3	3	21	30	1	6	0	7	0	0	3	0	0	0	0	1	0	0	0	0	0	1	0	0	0	0	0	0	7	2	0	5	0	1	1	1	1	1	1	92
293	2	69	1	2	167	63	3	3	1	22	30	1	6	30	7	0	0	0	0	2	0	0	0	0	1	0	0	0	3	1	1	10	1	1	10	6	1	30	2	10	0	1	1	1	1	1	90
294	2	67	1	3	155	50	1	3	1	20	30	1	6	30	8	0	3	3	0	0	0	0	0	0	0	0	0	0	3	0	0	0	0	0	0	7	1	0	1	0	1	1	1	1	1	1	81
295	2	60	1	3	160	65	1	3	3	22	10	1	6	30	7	0	0	0	0	0	0	0	0	0	0	0	0	0	1	1	1	30	2	1	30	7	1	30	2	30	0	1	1	1	1	1	85
296	2	58	1	4	160	63	3	3	1	22	30	3	7	10	8	0	0	0	0	0	0	0	0	0	1	0	0	0	1	0	0	0	5	1	30	6	1	30	2	10	0	1	1	1	1	1	87
297	2	52	1	4	164	65	2	3	2	22	0	2	7	0	8	1	1	0	0	0	0	0	1	0	1	0	0	0	4	1	0	10	7	1	1	2	0	20	1	20	1	1	1	1	1	1	91
298	2	65	1	3	163	60	1	3	3	22	0	1	6	0	7	0	3	3	0	0	0	0	0	3	1	0	0	0	1	0	0	0	0	0	0	0	0	0	2	0	0	1	1	1	2	1	73
299	2	63	1	2	160	70	2	3	1	22	0	4	5	0	6	2	2	2	0	0	0	0	0	0	2	0	3	0	4	0	0	0	7	1	0	7	7	0	4	0	0	1	1	1	1	1	82
300	2	61	1	4	160	55	1	3	1	22	0	2	6	0	7	1	1	1	0	0	0	0	0	0	1	0	0	0	3	0	0	0	7	2	0	7	2	0	2	0	0	1	1	1	1	1	88
301	2	59	1	3	165	45	2	3	3	23	0	1	7	0	8	0	0	0	0	0	0	0	0	0	0	0	0	0	3	0	0	0	7	2	0	7	1	0	2	0	0	1	1	1	1	1	90
302	2	67	1	2	155	60	2	3	3	21	0	1	5	0	8	0	0	2	0	0	0	0	0	0	0	0	2	0	3	0	0	0	0	0	0	7	2	0	2	0	0	1	1	1	1	1	79
303	2	58	1	3	165	60	1	3	3	22	0	1	7	30	6.5	1	3	2	0	1	0	0	0	0	2	0	0	0	3	0	0	0	0	0	0	7	0	30	7	0	0	2	1	1	2	1	60
304	2	76	1	3	164	63	2	3	3	21	30	2	6	0	5.5	3	3	3	3	0	0	0	3	0	1	3	0	0	1	0	0	0	0	0	0	7	1	0	4	0	1	2	1	2	1	1	75
305	2	67	1	3	165	62	1	3	2	20	0	4	4	30	5	3	3	3	0	0	0	0	0	0	2	0	0	0	1	0	0	0	0	0	0	7	1	30	0	0	1	1	1	1	1	1	72
306	2	68	2	1	150	54	1	3	3	21	30	2	5	30	6	0	1	1	0	0	0	0	0	0	1	0	0	0	1	0	0	0	0	0	0	7	2	0	0	30	0	1	1	1	1	1	82
307	2	74	1	1	167	65	1	3	1	22	0	1	7	0	8	0	0	3	0	0	0	0	0	0	0	0	0	0	1	0	0	0	0	0	0	0	0	0	6	0	1	1	1	1	1	1	92
308	2	69	1	2	152	60	1	3	3	21	30	1	6	30	6	0	1	1	0	0	0	0	0	0	0	0	0	0	2	0	0	0	0	0	0	7	1	0	3	30	0	1	1	1	1	1	94
309	2	71	1	1	160	62	2	3	3	20	0	4	5	30	3	3	3	3	0	0	0	0	0	0	3	3	0	1	1	0	0	0	0	0	0	0	0	0	3	0	1	1	1	1	1	1	60
310	2	70	1	2	162	60	1	3	3	22	0	1	6	0	7	0	0	1	0	0	0	0	0	0	0	0	0	0	2	0	0	0	0	0	0	7	1	30	3	30	0	1	1	1	1	1	78
311	2	70	1	2	162	60	1	3	3	22	0	1	6	0	8	0	0	1	0	0	0	0	0	0	0	0	3	0	3	0	0	0	7	1	0	0	0	0	3	0	1	1	1	1	1	1	90
312	2	66	2	3	149	62	1	3	3	23	10	1	6	30	6	1	0	2	0	2	0	2	2	2	1	0	0	0	4	0	0	0	7	2	0	0	0	0	2	40	1	1	1	1	2	1	90
313	2	68	1	2	158	60	2	3	1	22	30	1	7	0	8	0	0	0	0	0	0	0	2	0	0	0	0	0	2	0	0	0	7	1	0	0	0	0	0	0	0	1	1	1	1	1	80
314	2	69	1	2	153	55	1	3	1	20	30	1	5	0	7	0	1	1	0	0	0	0	0	0	0	0	0	0	2	0	0	0	0	0	0	7	1	30	3	10	0	1	1	1	1	1	87
315	2	72	1	3	153	60	1	3	3	21	0	2	6	30	8	0	0	2	0	0	0	0	0	0	0	0	0	0	4	7	0	0	7	1	0	7	0	0	7	0	0	1	1	1	1	1	82
316	2	58	1	3	165	75	2	3	3	22	0	1	7	0	7	0	0	3	0	3	0	0	0	0	0	0	0	0	4	0	0	0	7	1	0	7	2	0	4	0	1	1	1	1	1	1	87
317	2	74	1	2	158	60	1	3	1	22	0	2	5	0	6	1	1	1	0	0	0	2	0	0	1	0	0	0	4	0	0	0	0	0	0	5	2	0	6	0	0	1	1	1	1	1	80
318	2	71	1	3	163	72	3	3	3	21	0	3	3	0	5	3	3	0	0	0	0	0	2	0	3	2	2	0	4	0	0	0	0	0	0	7	1	0	1	0	1	1	1	1	1	1	81
319	2	68	1	4	155	56	2	3	1	22	0	1	5	0	7	0	0	2	2	0	0	0	0	0	1	0	0	0	2	0	0	0	7	2	0	7	1	0	4	0	0	1	1	1	1	1	67
320	2	63	1	3	160	60	1	3	2	21	0	2	6	30	8	0	0	3	0	0	0	0	1	0	0	0	3	0	1	0	0	0	7	1	0	7	1	0	7	0	1	1	1	1	1	1	80
321	2	62	1	3	160	70	2	3	3	22	0	1	6	0	7	0	1	0	0	1	0	0	1	0	1	0	0	0	4	0	0	0	7	0	0	7	1	0	0	0	0	1	1	1	1	1	88
322	2	61	1	3	162	57	1	3	3	21	30	4	7	0	6	3	3	3	0	0	0	0	3	3	1	0	0	0	4	0	0	0	0	0	0	7	1	0	4	0	1	1	1	1	1	1	83
323	2	62	1	2	160	50	1	3	3	22	0	2	6	0	6	3	2	3	2	3	2	2	0	1	2	2	2	1	4	0	0	0	5	0	30	3	0	30	4.5	0	0	1	1	1	2	2	70
324	2	62	1	2	165	75	1	3	1	20	0	4	6	0	2	3	3	3	0	0	0	0	0	3	3	2	1	1	2	0	0	0	0	0	0	7	1	30	2	0	1	1	1	1	4	1	49
325	2	72	1	4	150	55	2	3	3	21	0	2	5	0	8	3	3	3	0	3	0	0	3	3	1	0	0	1	1	0	0	0	0	0	0	0	0	0	1	0	1	2	1	1	2	2	60
326	2	77	2	2	150	50	1	3	2	21	30	1	6	0	7	0	0	0	0	0	0	0	0	0	1	0	0	1	1	0	0	0	0	0	0	7	1	0	4	0	1	1	1	1	1	1	88
327	2	73	1	2	150	60	1	3	3	21	30	1	6	30	7	0	0	0	0	0	0	0	0	0	1	0	0	0	1	0	0	0	6	1	30	6	1	30	3	20	0	1	1	1	1	1	88
328	2	69	1	3	164	50	3	3	2	24	0	2	7	0	7	0	0	0	0	0	0	0	0	0	1	0	0	0	1	0	0	0	7	4	0	0	0	0	0	0	0	1	1	1	1	1	95
329	2	69	2	2	167	72	1	3	3	22	0	1	4	0	6	0	0	1	0	3	0	0	0	0	0	0	0	0	4	0	0	0	7	2	0	7	1	0	4	0	1	1	1	1	1	1	95
330	2	69	1	2	167	72	1	3	2	21	30	2	4	30	5	1	1	3	0	0	0	0	0	0	1	0	0	0	4	0	0	0	0	0	0	7	2	0	5	0	1	1	1	1	1	1	82
331	2	60	1	2	153	48	1	3	3	21	30	1	5	20	7	0	0	0	0	0	0	0	0	0	1	0	0	0	3	2	1	10	6	1	30	7	2	10	1	30	0	1	1	1	1	1	84
332	2	73	2	2	154	50	1	3	3	21	30	1	6	0	8	0	1	1	0	0	0	0	0	0	0	0	0	0	4	0	0	0	0	0	0	2	0	0	3	0	1	1	1	1	1	1	100
333	2	70	2	2	153	60	1	3	2	22	0	1	5	30	7	0	0	3	0	3	0	0	2	3	0	0	0	0	4	0	0	0	0	0	0	7	1	0	6	0	0	1	1	1	1	1	86
334	2	67	2	3	160	55	1	1	3	23	0	3	6	30	4	2	2	2	0	0	0	0	0	0	2	1	0	0	1	0	0	0	0	0	0	0	0	0	4	30	0	1	1	1	1	1	73
335	2	64	1	3	155	60	2	3	2	22	0	1	6	0	8	0	3	3	0	0	0	0	0	0	0	0	0	0	4	0	0	0	7	1	0	7	1	1	5	0	0	1	1	1	1	1	89
336	2	52	1	3	156	50	1	3	2	23	30	1	8	30	6	0	3	3	0	0	1	0	0	0	1	0	0	1	4	2	1	0	1	1	0	0	0	0	6	0	1	1	1	1	3	4	67
337	2	67	1	2	163	75	1	3	1	21	33	1	5	30	6	0	2	3	0	0	0	0	0	0	1	0	0	0	3	3	1	10	3	1	30	7	1	0	3	20	0	1	1	1	1	1	73
338	2	65	1	2	150	50	1	3	1	22	0	1	6	0	6	0	1	1	0	0	0	0	0	0	0	0	0	0	2	0	0	0	0	0	0	7	1	30	3	30	0	1	1	1	1	1	85
339	2	63	1	3	168	80	1	3	3	21	0	1	6	0	8	0	0	0	0	0	0	0	0	0	0	0	0	0	4	0	0	0	0	0	0	0	0	0	4	0	0	1	1	1	1	1	89
340	2	69	1	4	158	56	2	3	1	21	20	4	5	0	4	3	3	1	0	0	3	3	0	0	1	0	0	0	4	1	2	30	0	0	0	6	2	0	2	0	0	1	1	1	1	2	87
341	2	62	2	2	158	56	1	3	1	24	0	1	7	0	6	0	0	0	0	0	0	0	0	0	0	0	0	0	4	0	0	0	7	1	30	0	0	0	0	0	0	1	1	1	1	1	85
342	2	70	1	2	155	53	1	3	1	21	0	3	5	30	7	2	1	2	0	0	0	0	0	0	1	0	0	0	1	0	0	0	7	1	0	0	0	0	0	0	0	1	1	1	1	1	86
343	2	81	1	1	155	45	1	3	2	22	10	1	7	0	6	0	0	3	0	1	0	0	0	0	0	0	0	0	1	0	0	0	0	0	0	7	1	0	3	0	0	1	1	1	1	1	78
344	2	66	1	3	153	70	1	3	3	20	30	2	6	0	7	1	2	3	0	0	0	0	0	0	1	0	0	0	4	0	0	0	0	0	0	7	1	0	5	0	1	1	1	1	1	1	84
345	2	55	1	3	165	55	2	3	3	22	0	1	7	0	8	0	0	0	0	0	0	0	0	0	0	0	0	0	4	0	0	0	7	1	0	7	3	0	3	0	0	1	1	1	3	3	89
346	2	58	1	3	170	60	1	3	3	22	0	2	7	0	7	0	0	0	0	0	0	0	0	0	1	0	0	0	1	0	0	0	0	0	0	7	2	0	6	0	0	1	1	1	1	1	82
347	2	68	1	4	166	55	1	3	3	21	0	1	6	0	9	0	0	1	0	0	0	0	0	0	0	0	0	0	1	1	1	0	7	1	0	0	0	0	3	0	1	1	1	1	1	1	88
348	2	63	1	4	160	60	2	3	3	22	0	2	6	0	7	0	1	1	0	0	0	0	0	0	1	0	0	0	4	0	0	0	0	0	0	7	2	0	3	0	0	1	1	1	1	1	80
349	2	70	1	3	160	64	1	3	3	21	0	2	5	30	6	0	3	3	0	3	0	0	0	0	1	0	0	0	1	0	0	0	0	0	0	0	0	0	3	0	0	1	1	1	1	1	89
350	2	69	2	3	160	75	1	3	3	21	0	2	5	0	6	1	0	2	0	0	0	0	0	0	1	0	0	0	1	0	0	0	0	0	0	7	1	0	6	0	1	1	1	1	1	1	83
351	2	71	1	2	164	75	2	3	2	21	0	2	6	0	8	0	0	2	0	0	0	0	0	0	0	0	3	0	1	0	0	0	7	1	0	7	1	0	2	0	0	1	1	1	1	1	82
352	2	66	1	2	160	55	1	3	3	21	0	1	6	30	7	0	2	0	0	0	0	0	0	0	0	2	0	0	2	0	0	0	7	1	30	0	0	0	0	0	0	2	1	1	1	1	82
353	2	61	2	3	166	85	1	3	3	22	0	2	7	0	7	1	0	3	0	0	0	0	1	0	0	0	0	0	3	0	0	0	7	2	30	7	2	30	2	30	0	1	1	1	1	1	84
354	2	68	1	3	168	70	2	3	2	21	0	1	5	0	8	0	0	1	0	0	0	0	0	0	0	0	2	0	1	0	0	0	0	0	0	7	2	0	2	0	0	1	1	1	1	1	87
355	2	58	1	2	158	60	1	3	3	18	30	1	6	30	8	0	0	0	0	0	0	0	0	0	1	0	0	0	1	0	0	0	6	1	30	7	1	30	3	20	0	1	1	1	1	1	83
356	2	75	1	3	160	60	2	3	3	22	0	2	6	0	5	3	3	1	0	0	0	0	0	0	1	0	0	0	4	0	0	0	0	0	0	7	2	0	4	0	1	1	1	1	1	1	73
357	2	70	1	4	160	64	1	3	3	22	0	2	6	0	8	0	0	0	0	0	0	0	0	0	0	0	0	0	4	0	0	0	7	1	0	7	1	0	5	0	0	1	1	1	1	1	91
358	2	65	1	3	158	70	2	3	3	21	30	3	6	30	7	2	0	0	0	1	0	0	0	0	1	0	0	0	1	1	1	30	1	1	30	7	1	30	2	10	0	1	1	1	1	1	89
359	2	78	1	2	160	75	1	3	3	21	30	1	6	30	7	0	0	0	0	0	0	0	0	0	1	0	0	0	1	0	0	0	5	1	30	6	1	30	2	20	0	1	1	1	1	1	84
360	2	78	1	2	160	70	2	3	2	22	0	1	6	30	7	0	0	0	0	0	0	0	0	0	0	0	0	0	1	1	1	30	2	2	0	7	1	30	1	20	0	1	1	1	1	1	92
361	2	75	1	3	158	55	1	3	2	22	0	2	4	30	6	1	0	0	0	0	0	0	0	0	1	0	0	0	4	0	0	0	0	0	0	7	1	0	6	0	1	1	1	1	1	1	83
362	2	75	1	2	158	50	2	3	3	21	0	2	5	30	8	0	0	0	0	0	0	0	0	0	0	0	3	0	1	0	0	0	7	1	0	7	1	0	2	0	1	1	1	1	1	1	87
363	2	71	1	1	160	60	1	3	3	21	30	1	6	20	7	0	0	0	0	0	0	0	0	0	1	0	0	0	1	0	0	0	6	1	30	7	1	30	3	20	0	1	1	1	1	1	85
364	2	62	1	2	159	60	1	3	3	22	0	1	6	30	6	0	0	1	0	0	0	0	0	0	0	0	0	0	1	0	0	0	0	0	0	7	1	30	3	30	0	1	1	1	1	1	83
365	2	72	1	3	158	60	1	3	1	21	30	3	6	30	7	0	0	0	0	0	0	0	0	0	1	0	0	0	1	0	0	0	6	1	30	7	1	30	3	20	0	1	1	1	1	1	85
366	2	69	1	4	163	62	1	3	2	22	0	1	6	0	6	1	1	1	0	0	0	0	0	0	0	0	0	0	1	0	0	0	0	0	0	7	1	30	3	30	0	1	1	1	1	1	84
367	2	69	1	4	160	60	2	3	1	21	30	3	6	10	7	0	0	0	0	0	0	0	0	0	1	0	0	0	1	0	0	0	7	1	30	7	1	30	3	10	0	1	1	1	1	1	87
368	2	70	1	2	157	67.5	1	2	2	22	15	3	6	0	3.5	3	3	3	0	2	0	3	1	3	3	0	3	0	4	0	0	0	3.5	1	30	0	0	0	6	0	1	1	1	1	3	1	80
369	2	68	1	1	165	54	1	3	3	20	30	2	6	0	8	0	0	0	0	0	0	0	0	0	0	0	0	0	1	0	0	0	0	0	0	7	1	0	6	0	0	1	1	1	1	1	83
370	2	67	1	3	150	65	2	3	3	22	30	1	6	30	6	0	1	1	0	0	0	0	0	0	0	0	0	0	2	0	0	0	0	0	0	7	1	30	3	30	0	1	1	1	1	1	81
371	2	66	1	2	165	75	1	3	3	20	30	3	6	30	8	0	0	0	0	0	0	0	0	0	0	0	0	0	1	0	0	0	7	1	30	7	1	30	3	20	0	1	1	1	1	1	93
372	2	65	1	3	157	65	1	3	2	21	30	3	6	30	7	0	0	0	0	0	0	0	0	0	0	0	0	0	1	0	0	0	6	1	30	6	1	30	3	20	0	1	1	1	1	1	81
373	2	65	1	3	157	65	1	3	1	21	30	3	6	20	7	0	0	0	0	0	0	0	0	0	1	0	0	0	1	0	0	0	6	1	30	5	1	30	2	30	0	1	1	1	1	1	87
374	2	65	1	3	150	50	2	3	3	21	30	3	6	30	7	0	0	0	0	0	0	0	0	0	1	0	0	0	1	0	0	0	6	1	30	5	1	30	2	30	0	1	1	1	1	1	84
375	2	64	1	3	160	60	1	3	3	21	30	3	6	30	7	0	0	0	0	0	0	0	0	0	1	0	0	0	1	0	0	0	6	1	30	6	1	30	3	20	0	1	1	1	1	1	88
376	2	64	1	3	158	65	1	3	3	21	30	3	6	30	7	0	0	0	0	0	0	0	0	0	1	0	0	0	1	0	0	0	7	1	30	7	1	30	3	20	0	1	1	1	1	1	85
377	2	64	1	2	160	65	1	3	3	21	30	3	6	30	7	0	0	0	0	0	0	0	0	0	1	0	0	0	1	0	0	0	5	1	30	5	1	30	2	30	0	1	1	1	1	1	79
378	2	62	1	3	158	60	2	3	2	21	0	2	6	0	7	1	1	1	0	1	0	0	0	0	1	0	2	0	2	0	0	0	0	0	0	7	0	30	1	0	0	1	1	1	1	1	85
379	2	60	1	2	155	46	1	3	3	21	20	2	6	0	8	1	2	3	0	0	0	3	1	1	2	0	0	0	4	4	1	0	4	1	0	7	1	0	3	0	1	1	1	1	2	1	85
380	2	69	1	4	163	60	2	3	3	22	0	1	6	0	6	0	0	1	0	0	0	0	0	0	0	0	0	0	1	0	0	0	0	0	0	7	1	0	3	10	0	1	1	1	1	1	79
381	2	69	1	4	168	60	2	3	3	21	30	1	6	0	7	0	0	0	0	0	0	0	0	0	0	0	0	0	1	0	0	0	7	2	0	7	2	10	3	10	0	1	1	1	1	1	84
382	2	66	1	3	164	70	2	3	3	21	30	1	6	10	7	0	0	0	0	0	0	0	0	0	0	0	0	0	1	0	0	0	7	1	30	7	1	30	1	30	0	1	1	1	1	1	94
383	2	66	1	3	168	70	2	3	3	21	30	3	6	30	7	0	0	0	0	0	0	0	0	0	1	0	0	0	1	0	0	0	7	1	30	7	1	30	3	20	0	1	1	1	1	1	85
384	2	66	1	3	168	60	2	3	2	21	30	2	6	30	7	0	0	0	0	0	0	0	0	0	0	0	0	0	1	0	0	0	7	2	0	7	2	0	2	10	0	1	1	1	1	1	88
385	2	61	1	3	164	70	1	3	3	22	0	2	5	0	6	1	0	0	0	0	0	2	0	2	1	0	0	0	4	0	0	0	0	0	0	7	2	30	5	0	0	1	1	1	1	1	80
386	2	61	1	3	160	62	1	3	3	21	10	3	6	30	8	0	0	0	0	0	0	0	0	0	1	0	0	0	1	0	0	0	7	1	30	7	1	30	2	30	0	1	1	1	1	1	85
387	2	61	2	3	164	70	1	3	3	21	30	1	6	0	7	0	0	0	0	0	0	0	0	0	1	0	0	0	1	0	0	0	7	1	30	7	1	30	3	10	0	1	1	1	1	1	88
388	2	61	1	3	156	70	1	3	3	22	0	1	6	0	7	0	0	1	0	0	0	0	0	0	0	0	0	0	2	0	0	0	0	0	0	7	1	0	3	30	0	1	1	1	1	1	85
389	2	61	1	3	170	65	1	3	3	21	30	1	6	30	8	0	0	0	0	0	0	0	0	0	0	0	0	0	1	0	0	0	7	2	30	7	1	30	3	20	0	1	1	1	1	1	85
390	2	60	1	3	160	50	2	3	2	21	30	1	6	30	8	0	0	0	0	0	0	0	0	0	0	0	0	0	1	0	0	0	7	1	30	7	1	0	3	30	0	1	1	1	1	1	85
391	2	56	1	2	156	75	1	3	3	21	0	4	7	0	7	0	0	0	0	0	0	0	0	0	1	0	2	0	4	2	2	40	2	1	0	5	2	20	5	10	0	1	1	1	1	1	86
392	2	52	1	4	158	60	1	3	3	22	0	1	6	0	7	0	0	0	0	0	0	0	0	0	0	0	0	0	1	0	0	0	1	1	0	7	1	30	3	10	0	1	1	1	1	1	100
393	2	52	1	4	158	50	2	3	3	21	30	1	6	10	7	0	0	0	0	0	0	0	0	0	1	0	0	0	1	0	0	0	5	1	30	6	1	30	3	20	0	1	1	1	1	1	82
394	2	69	1	3	158	65	1	3	3	22	0	1	4	0	6	0	0	0	0	0	0	0	0	0	0	0	0	0	1	0	0	0	0	0	0	0	0	0	2	0	1	1	1	1	1	1	89
395	2	72	1	2	168	61	3	3	3	22	0	2	6	0	8	0	3	3	0	0	0	0	3	0	1	0	0	0	4	0	0	0	0	0	0	0	0	0	1	0	0	1	1	1	1	1	81
396	2	61	1	3	164	57	2	3	3	22	0	4	6	0	7	1	1	1	0	0	0	0	0	0	1	0	0	0	2	0	0	0	7	1	0	7	2	0	4	0	1	1	1	1	1	1	90
397	2	78	1	4	158	62	1	3	2	23	30	2	7	0	5	3	3	3	0	3	0	0	0	0	1	0	0	0	4	0	0	0	0	0	0	7	2	0	5	0	1	1	1	1	1	1	82
398	2	67	2	4	160	57	2	3	3	23	0	1	6	0	7	0	0	0	0	0	0	0	0	0	0	0	0	0	4	7	1	0	7	2	0	7	1	30	3	0	0	1	1	1	1	1	92
399	2	60	1	4	162	52	2	3	3	22	0	4	5	0	4	3	3	3	0	0	0	0	0	3	3	3	0	0	1	0	0	0	7	4	0	0	0	0	3	0	1	1	1	1	2	2	66
400	2	68	1	2	160	64	1	3	3	22	0	1	5	0	6	1	1	1	0	0	0	1	0	0	1	0	0	0	4	0	0	0	7	1	30	7	2	30	5	0	1	1	1	1	1	1	66
401	2	79	1	4	165	55	2	3	3	22	0	2	6	0	6	0	0	1	0	0	0	0	0	0	0	0	0	0	2	0	0	0	7	1	0	7	0	30	3	0	1	1	1	1	1	1	85
402	2	77	1	4	156	65	2	3	3	23	0	2	5	30	5	0	3	3	0	2	0	0	2	0	1	0	0	1	4	2	1	0	1	0	0	7	1	0	3	0	1	1	1	1	1	1	81
403	2	70	1	3	158	52	2	3	3	22	0	2	7	0	8	3	0	3	0	0	0	0	0	0	1	3	0	1	4	0	0	0	1	1	0	0	0	0	8	0	1	1	1	1	1	1	90
404	2	76	1	4	146	49	2	3	2	21	0	2	7	0	8	0	2	2	0	0	0	0	0	1	0	1	0	0	4	0	0	0	0	0	0	7	1	0	2	30	1	1	1	1	2	1	87
405	2	64	1	4	158	50	2	3	3	21	0	1	6	0	8	0	0	0	0	0	0	0	0	0	1	0	0	0	1	7	1	0	7	1	0	5	1	0	1	0	0	1	1	1	1	1	99
406	2	61	2	3	155	55	1	3	3	23	0	2	5	0	6	1	1	1	0	1	1	1	1	0	1	0	0	0	2	1	2	0	1	0	0	5	1	0	5	0	1	1	1	1	1	1	80
407	2	70	1	4	158	42	2	3	3	22	0	4	7	0	5	3	0	3	0	3	3	3	1	3	3	3	0	1	4	0	0	0	7	0	30	0	0	0	4	0	0	1	1	1	2	2	60
408	2	70	1	4	157	43	2	3	2	22	0	4	7	30	7	3	0	3	0	0	0	0	1	3	2	3	0	0	4	0	0	0	7	0	45	7	1	0	7	0	1	1	1	1	1	1	60
409	2	69	2	3	160	56	1	3	3	22	30	2	7	0	6.3	2	2	2	0	0	0	1	1	2	1	0	0	1	4	0	0	0	0	0	0	7	1	30	3	30	1	1	1	1	2	1	80
410	2	50	1	2	156	53	1	3	3	22	0	2	6	0	7	3	3	3	0	0	0	0	0	0	1	0	0	0	4	0	0	0	0	0	0	0	0	0	2	0	0	1	1	1	1	1	79
411	2	69	1	3	162	57	3	3	3	23	0	3	7	30	5	3	3	3	0	0	0	0	0	0	2	3	0	2	4	0	0	0	7	1	0	3	0	30	6	0	1	4	3	4	3	2	40
412	2	63	1	2	156	52	2	3	2	22	0	2	6	0	6	1	2	3	2	1	0	3	0	0	1	0	0	0	4	0	0	0	0	0	0	0	0	0	5	0	1	1	1	1	1	2	83
413	2	62	1	2	165	56	1	3	3	22	0	1	7	30	7	0	0	0	0	0	0	0	0	0	0	0	0	0	1	0	0	0	4	2	30	7	2	30	2	30	0	1	1	1	1	1	87
414	2	62	1	3	163	53	1	3	3	22	30	2	6	0	8	0	1	1	0	0	0	0	0	0	0	0	0	0	1	0	0	0	0	0	0	7	2	0	5	0	1	1	1	1	1	1	82
415	2	68	1	4	168	65	1	3	3	23	0	2	7	0	6	1	1	3	0	0	0	1	1	2	1	0	0	1	3	2	0	10	5	0	40	1	0	20	2	0	1	1	1	1	3	3	61
416	2	80	1	4	153	57	1	3	3	23	0	2	5	30	5	2	3	3	0	0	0	2	0	0	1	3	0	0	1	0	0	0	7	0	30	0	0	0	3	0	1	1	1	1	2	2	80
417	2	70	1	2	159	47	3	3	3	22	10	2	5	40	7	2	2	3	0	0	0	3	0	0	2	2	0	0	4	7	1	10	7	1	10	7	1	10	1	10	1	1	1	1	1	1	87
418	2	53	1	2	155	45	1	3	3	22	30	2	7	0	7	2	2	3	0	0	0	0	2	0	1	0	0	0	4	0	0	0	6	1	0	7	1	30	2	0	0	1	1	1	1	1	81
419	2	69	1	2	150	58	2	3	3	22	30	2	6	0	7	1	3	3	0	0	0	2	0	0	2	0	0	0	4	0	0	0	7	1	0	0	0	0	4	30	1	1	1	1	1	1	89
420	2	74	1	2	168	70	1	3	3	21	0	1	6	0	7	0	2	2	0	0	0	0	0	0	0	0	3	0	2	0	0	0	7	2	0	0	0	0	0	0	0	1	1	1	1	1	78
421	2	73	1	2	159	53	1	3	3	23	30	1	5	0	5	0	0	3	0	0	0	0	2	0	1	0	0	0	4	0	0	0	7	3	0	0	0	0	2	30	0	1	1	1	1	1	80
422	2	66	1	2	156	65	1	3	3	22	0	2	6	0	7	3	0	3	2	1	3	3	0	0	0	0	0	0	4	0	0	0	0	0	0	0	0	0	6	0	1	1	1	1	1	1	62
423	2	68	1	2	155	55	2	3	1	22	30	1	5	30	7	0	0	0	0	0	0	0	0	0	1	0	0	0	1	0	0	0	4	1	30	7	0	0	3	10	0	1	1	1	1	1	94
424	2	76	1	1	165	65	1	3	3	21	0	2	6	0	7	1	1	1	0	0	0	0	0	0	1	0	0	0	1	0	0	0	5	1	0	5	1	0	3	0	0	1	1	1	1	1	97
425	2	66	1	1	163	55	1	3	3	22	0	2	6	0	8	0	1	1	0	0	0	0	0	0	0	2	0	0	1	0	0	0	0	0	0	7	3	0	3	0	0	1	1	1	1	1	80
426	2	70	1	2	146	45	2	3	1	23	0	1	6	0	6	0	1	0	0	0	0	0	0	0	1	0	2	0	3	0	0	0	0	0	0	7	2	0	2	0	0	1	1	1	1	1	94
427	2	69	2	4	157	55	1	3	2	22	10	1	6	10	7	0	2	3	0	0	0	0	0	0	1	0	0	0	4	0	0	0	0	0	0	7	1	0	3	0	0	1	1	1	1	1	63
428	2	75	1	2	155	62.5	1	3	2	22	30	2	6	0	7	0	0	2	0	0	0	0	1	2	1	0	0	0	4	0	0	0	0	0	0	5	1	30	3	0	0	1	1	1	1	1	70
429	2	59	1	4	157	55	1	3	2	22	0	2	7	30	7	0	0	3	0	0	0	0	0	0	0	0	0	0	4	0	0	0	5	1	0	7	1	30	5	0	1	1	1	1	1	1	100
430	2	67	1	3	168	70	3	3	3	22	15	1	7	15	8	2	2	3	0	0	0	0	0	0	2	3	0	0	1	7	1	30	7	1	30	7	1	10	3	30	0	1	1	1	1	1	81
431	2	65	1	2	156	65	1	3	1	22	0	1	6	0	6	0	1	1	0	0	0	0	0	0	0	0	0	0	2	1	1	0	1	1	30	7	1	30	3	30	0	1	1	1	1	1	93
432	2	80	1	4	157	50	2	3	3	23	0	4	7	0	5	3	3	3	0	0	0	0	0	0	2	3	0	0	1	0	0	0	0	0	0	7	2	0	5	0	1	1	1	1	1	1	79
433	2	63	1	4	160	62	3	3	1	22	30	3	5	30	6	1	1	2	0	2	0	2	1	0	1	1	0	1	4	0	0	0	2	1	0	0	0	0	8	0	1	1	1	1	2	1	82
434	2	62	1	4	163	55	2	3	2	23	0	2	7	0	7	1	1	3	0	1	0	2	0	1	1	0	0	0	4	2	0	30	5	1	0	5	0	45	1	0	1	1	1	1	2	2	80
435	2	78	1	4	157	54	3	3	3	21	30	3	6	0	7	2	1	2	0	1	1	1	0	0	1	0	0	0	2	0	0	0	1	1	30	1	1	30	3	0	1	1	1	1	1	1	70
436	2	75	1	2	155	60	1	3	3	21	0	1	6	0	8	0	2	1	0	0	0	0	0	0	0	0	0	0	1	1	1	0	3	1	0	7	1	0	2	30	0	1	1	1	1	1	79
437	2	69	1	4	160	61	2	3	3	22	30	1	6	30	7	0	2	1	0	0	0	0	0	0	0	0	0	0	1	1	1	0	2	1	30	7	1	30	2	45	0	1	1	1	1	1	94
438	2	76	1	2	160	65	1	3	1	22	0	3	6	30	5	3	3	2	0	0	0	0	3	0	2	0	0	0	1	1	1	0	1	1	0	7	0	20	5	0	0	2	1	1	1	1	74
439	2	69	1	3	160	65	1	3	3	21	0	2	6	30	6	1	1	1	0	0	0	0	0	0	1	0	0	0	3	0	0	0	0	0	0	7	1	0	5	0	0	1	1	1	1	1	78
440	2	60	1	1	162	75	2	3	2	22	0	1	8	0	10	0	3	3	0	0	0	0	0	0	0	0	0	0	1	0	0	0	0	0	0	0	0	0	5	30	0	1	1	1	1	1	89
441	2	71	1	1	158	60	1	3	2	22	30	3	5	30	7	0	0	0	0	0	0	0	0	0	1	0	0	0	1	0	0	0	5	1	30	5	1	30	3	20	0	1	1	1	1	1	85
442	2	70	1	4	157	55	2	3	3	22	0	1	5	30	7	0	0	0	0	0	0	0	0	0	1	0	0	1	1	3	0	10	5	0	40	7	1	30	3	30	1	1	1	1	2	2	77
443	2	62	1	3	163	61.5	2	3	3	22	20	3	7	30	9	0	0	3	0	1	0	0	0	0	1	0	0	0	4	0	0	0	0	0	0	0	0	0	2	30	0	1	1	1	2	1	93
444	2	80	1	2	156	60	1	3	3	21	30	3	6	30	7	0	0	0	0	0	0	0	0	0	1	0	0	0	1	0	0	0	5	1	30	6	1	30	2	30	0	1	1	1	1	1	78
445	2	65	1	4	160	70	3	3	3	22	0	3	5	0	7	3	3	2	0	0	0	2	0	0	1	1	1	0	1	0	0	0	4	1	0	7	1	0	2	0	0	1	1	1	2	1	77
446	2	58	1	2	164	70	1	3	3	22	0	1	6	30	7	1	1	3	0	0	0	0	0	0	1	0	0	0	4	3	1	20	5	1	30	0	0	0	1	30	0	1	1	1	1	1	100
447	2	69	1	4	163	62	2	3	3	22	0	3	6	30	7	2	2	2	0	0	0	0	0	0	1	0	0	0	3	2	1	0	2	1	0	3	1	0	3	0	1	1	1	1	1	2	84
448	2	67	1	2	150	58	2	3	2	22	30	1	6	30	8	0	0	3	0	0	0	0	0	0	0	0	0	0	1	2	2	30	2	2	30	6	2	30	2	30	1	1	1	1	2	1	86
449	2	65	1	4	157	46	2	3	3	22	30	2	6	0	6.3	1	1	1	0	2	0	0	1	0	1	0	0	1	2	4	0.2	0	6	2	0	6	2	0	2	0	1	1	1	1	2	1	85
450	2	65	1	3	158	55	2	3	1	22	0	3	5	30	6	2	2	3	0	0	0	0	0	1	1	0	0	1	4	7	2	0	7	2	0	7	1	0	3	0	0	1	1	1	2	2	97
451	2	60	1	4	160	58	2	3	3	22	0	2	5	30	6	1	2	3	0	0	0	0	1	0	1	0	0	0	3	7	1	0	7	1	0	7	1	0	3	0	0	1	1	1	1	1	100
452	2	60	1	4	152	46	2	3	3	21	30	2	5	30	5	3	3	2	0	0	0	0	0	0	1	0	3	0	4	0	0	0	0	0	0	0	0	0	2	0	1	1	1	1	1	2	76
453	2	57	1	2	160	75	1	3	3	22	0	2	7	0	7	1	2	2	0	2	0	3	0	1	1	0	0	0	4	0	0	0	5	1	0	0	0	0	6	0	0	1	1	1	1	1	87
454	2	56	1	4	162	55	2	3	1	22	0	1	6	30	8	0	0	0	0	0	0	0	1	0	0	0	0	0	2	0	0	0	7	2	0	0	0	0	3	30	0	1	1	1	1	1	80
455	2	59	1	4	161	60	1	3	3	22	30	1	6	30	6	1	1	0	0	1	0	0	0	0	0	0	0	0	4	1	2	30	5	1	30	7	1	30	1	30	0	1	1	1	1	1	100
456	2	70	1	2	166	80	1	3	2	22	0	2	6	30	7	0	0	0	0	0	0	0	0	0	0	0	0	0	1	7	2	0	7	2	10	7	1	30	2	40	0	1	1	1	1	1	100
457	2	80	2	4	150	61	1	3	3	21	30	1	6	30	8	0	1	3	0	3	0	0	0	0	1	0	0	1	4	0	0	0	0	0	0	1	1	0	2	30	1	1	1	1	2	1	90
458	2	80	1	2	160	62	1	3	3	22	10	1	5	30	7	0	0	0	0	0	0	0	0	0	0	0	2	0	1	1	1	10	5	1	30	7	1	30	1	20	0	1	1	1	1	2	86
459	2	64	1	3	160	65	1	3	3	22	0	2	6	0	7	1	1	1	0	3	0	0	0	0	1	0	0	0	2	0	0	0	0	0	0	0	0	0	3	0	1	1	1	1	1	1	70
460	2	72	1	2	148	60	1	3	2	21	30	2	6	30	7	0	0	0	0	0	0	0	0	0	1	0	0	0	1	0	0	0	7	1	30	7	2	10	2	30	0	1	1	1	1	1	84
461	2	72	1	2	150	60	1	3	3	22	30	1	6	0	6	0	0	1	0	0	0	0	0	0	0	0	0	0	1	0	0	0	0	0	0	7	0	0	3	10	0	1	1	1	1	1	92
462	2	72	1	1	162	52	1	3	3	21	30	3	6	10	7	0	0	0	0	0	0	0	0	0	1	0	0	0	1	1	1	10	5	1	30	5	1	30	1	20	1	1	1	1	1	1	89
463	2	72	1	2	162	65	1	3	2	22	10	1	6	30	8	0	0	0	0	0	0	0	0	0	1	0	0	0	1	0	0	0	7	1	30	6	1	30	2	30	1	1	1	1	1	1	86
464	2	64	1	3	167	60	1	3	3	21	0	1	6	0	6	0	0	1	0	0	0	0	0	0	1	0	0	0	1	0	0	0	0	0	0	7	1	0	3	30	0	1	1	1	1	1	78
465	2	81	1	1	150	51	1	3	3	22	30	1	6	0	6	0	0	0	0	0	0	0	0	0	1	0	0	0	1	1	1	20	4	1	30	5	1	30	1	30	1	1	1	1	1	1	90
466	2	71	1	2	155	62	1	3	3	22	0	4	7	0	6	3	3	3	3	0	0	0	0	0	2	0	0	1	1	0	0	0	0	0	0	0	0	0	2	0	1	1	1	1	1	1	76
467	2	59	1	2	155	65	2	3	3	24	0	1	7	30	7	0	1	0	0	2	0	0	0	0	0	0	0	0	4	0	0	0	7	3	0	5	1	0	4	0	1	1	1	1	2	1	82
468	2	67	1	3	154	60	1	3	1	21	30	1	6	0	6	0	1	1	0	0	0	0	0	0	1	0	0	0	1	0	0	0	1	1	30	7	1	30	3	30	0	1	1	1	1	1	90
469	2	79	1	3	163	53	2	3	3	21	0	1	6	30	6	0	3	3	0	0	0	0	0	0	1	0	0	0	1	0	0	0	0	0	0	0	0	0	5	0	0	1	1	1	1	1	80
470	2	82	2	3	156	48	2	3	2	21	30	1	7	0	8	0	0	0	0	0	0	0	0	0	0	0	0	0	4	0	0	0	7	2	30	7	0	30	6	0	1	1	1	1	1	1	90
471	2	65	1	3	150	47	2	3	3	22	0	1	6	0	7	0	1	1	0	0	0	0	0	0	0	0	0	0	4	0	0	0	0	0	0	7	1	1	5	0	0	1	1	1	1	1	88
472	2	79	2	4	160	55	1	3	3	22	0	2	6	30	8	0	0	2	0	0	0	0	0	1	1	0	1	1	3	0	0	0	7	1	0	7	1	0	3	0	1	3	1	1	2	2	82
473	2	59	1	4	160	55	1	3	3	22	0	1	7	30	7	0	3	3	0	1	0	0	2	0	1	0	0	0	4	7	1	0	7	1	0	7	1	0	3	0	0	1	1	1	1	1	91
474	2	56	1	3	163	55	1	3	3	21	0	2	6	30	6	0	1	1	0	1	0	0	0	0	1	0	0	0	2	0	0	0	0	0	0	0	0	0	2	0	1	1	1	1	1	1	93
475	2	67	1	4	163	59	1	3	3	21	30	1	7	0	7	0	0	0	0	0	0	0	0	0	1	0	0	0	1	0	0	0	0	0	0	7	1	0	3	30	0	1	1	1	1	1	87
476	2	56	1	3	168	70	1	3	3	24	0	1	7	0	7	0	3	3	0	1	0	3	0	1	2	0	0	0	4	0	0	0	0	0	0	7	0	30	5	0	0	1	1	1	1	1	91
477	2	74	2	1	156	61.5	1	3	1	21	30	3	6	0	8	0	1	0	0	0	0	0	0	0	0	0	0	0	1	0	0	0	7	0	40	7	0	30	3	0	1	1	1	2	1	1	90
478	2	72	2	2	160	42.5	1	3	3	22	0	2	7	0	9	0	1	3	0	1	0	0	0	3	0	0	0	3	1	0	0	0	7	3	0	0	0	0	6	0	1	1	1	1	2	1	89
479	2	63	1	3	170	72	2	3	3	22	0	2	6	0	7	1	1	0	0	2	0	0	1	1	0	0	0	0	4	0	0	0	7	3	0	7	3	0	4	0	1	1	1	1	2	1	80
480	2	66	1	3	160	70	1	3	3	22	0	1	6	0	6	0	1	1	0	0	0	0	0	0	0	0	0	0	1	0	0	0	0	0	0	7	2	0	3	30	0	1	1	1	1	1	81
481	2	64	1	2	155	45	1	3	3	22	0	1	6	0	6	0	1	1	0	0	0	0	0	0	0	0	0	0	2	0	0	0	0	0	0	7	1	30	3	30	0	1	1	1	1	1	92
482	2	70	1	3	165	55	1	3	3	21	0	1	5	0	8	0	2	1	0	0	0	0	0	0	0	0	0	0	1	0	0	0	0	0	0	7	1	0	1	0	0	1	1	1	1	1	79
483	2	70	1	2	160	75	1	3	1	22	30	2	6	0	8	1	0	2	0	0	0	0	2	2	1	0	3	0	1	0	0	0	7	1	0	5	1	0	2	0	0	1	1	1	2	1	75
484	2	67	1	4	160	65	2	3	3	22	0	2	6	0	8	0	3	2	0	2	0	0	3	0	2	0	0	0	1	0	0	0	0	0	0	7	1	0	4	0	1	1	1	1	1	1	88
485	2	78	1	1	158	50	1	3	2	20	30	2	5	30	9	0	0	0	0	0	0	0	0	0	0	0	0	0	1	0	0	0	0	0	0	7	3	0	2	0	0	1	1	1	1	1	89
486	2	74	2	1	162	57	1	3	3	20	0	4	6	0	8	0	0	2	0	0	0	2	0	0	1	0	0	0	4	0	0	0	0	0	0	7	3	0	4	0	0	1	1	1	1	1	82
487	2	71	1	3	155	67	1	3	1	22	0	4	6	0	5	1	3	3	0	0	0	0	0	0	1	0	0	0	1	0	0	0	0	0	0	7	2	0	3	0	0	1	1	1	1	1	80
488	2	60	1	3	163	60	2	3	3	22	30	1	6	0	8	0	0	3	0	3	0	0	0	0	1	0	3	0	3	0	0	0	0	0	0	7	2	0	4	0	0	1	1	1	1	1	82
489	2	57	1	3	160	55	1	3	3	22	10	2	6	0	7	1	1	0	0	0	0	0	0	0	0	0	0	0	2	5	1	0	6	1	0	1	1	1	7	0	1	1	1	1	1	1	100
490	2	59	1	3	155	50	2	3	2	21	0	4	6	0	7	0	0	0	0	0	0	0	0	0	1	0	0	0	1	0	0	0	0	0	0	7	2	0	2	0	0	1	1	1	1	1	90
491	2	64	1	2	162	65	1	3	3	23	0	4	5	0	6	3	3	3	0	1	0	0	0	0	0	0	0	0	4	0	0	0	0	0	0	7	1	0	3	0	1	1	1	1	1	1	81
492	2	72	1	2	168	70	1	3	2	21	30	2	4	30	7	0	3	3	0	2	0	0	0	0	0	0	0	0	4	0	0	0	0	0	0	7	1	30	6	0	1	1	1	1	1	1	87
493	2	64	1	3	160	57	1	3	3	21	0	1	6	30	7	0	0	1	0	0	0	0	0	0	0	0	0	0	1	0	0	0	0	0	0	7	1	30	3	30	0	1	1	1	1	1	89
494	2	59	1	1	158	45	1	3	3	22	0	3	6	30	8	0	0	0	0	0	0	0	0	0	0	0	0	0	4	0	0	0	0	0	0	0	0	0	2	0	0	1	1	1	1	1	75
495	2	65	1	2	160	68	1	3	1	22	0	1	6	0	8	0	0	3	0	0	0	0	0	0	0	0	0	0	1	0	0	0	7	1	0	0	0	0	2	0	0	1	1	1	1	1	80
496	2	56	1	2	156	50	1	3	2	22	0	1	6	0	7	0	0	1	0	0	0	0	0	0	0	0	0	0	1	0	0	0	1	1	0	7	1	0	3	0	0	1	1	1	1	1	85
497	2	58	1	3	150	50	1	3	3	21	0	1	7	0	8	0	0	0	0	0	0	0	0	0	0	0	0	0	2	7	1	0	5	1	0	5	1	0	1	30	0	1	1	1	1	1	88
498	2	63	1	4	156	65	2	3	3	21	10	2	7	30	9	0	0	0	0	1	0	0	0	0	1	0	0	0	3	1	1	10	7	1	30	7	2	30	1	30	1	1	1	1	1	1	88
499	2	68	1	2	155	62	1	3	3	22	30	3	6	30	8	0	0	0	0	0	0	0	0	0	1	0	3	0	1	0	0	0	0	0	0	7	2	0	2	0	0	1	1	1	1	1	91
500	2	65	1	2	155	40	2	3	2	23	30	2	7	30	8	0	1	1	0	0	0	0	0	0	1	0	0	0	1	0	0	0	0	0	0	0	0	0	1	0	1	1	1	1	1	1	82
501	2	57	2	3	159	56	1	3	2	22	0	2	6	0	7	3	3	3	0	0	0	0	0	0	1	0	0	0	4	0	0	0	0	0	0	0	0	0	3	0	0	1	1	1	1	1	78
502	2	66	1	2	153	50	1	3	2	22	0	1	6	0	8	0	0	0	0	0	0	0	0	0	0	0	0	0	3	0	0	0	0	0	0	7	1	0	0	0	0	1	1	1	1	1	91
503	2	65	1	4	158	65	3	3	3	20	0	2	5	0	6	0	3	3	0	3	0	0	0	0	1	0	0	0	4	0	0	0	0	0	0	0	0	0	0	20	1	1	1	1	1	1	73
504	2	56	1	2	160	50	1	3	3	22	0	1	7	0	8	0	0	0	0	0	0	0	0	0	0	0	2	0	1	1	1	0	3	2	20	5	2	0	1	0	0	1	1	1	1	1	84
505	2	69	1	3	164	60	1	3	3	22	0	1	7	0	5	0	3	3	0	3	0	3	0	0	1	0	0	0	4	0	0	0	0	0	0	7	1	0	6	0	1	1	1	1	1	1	88
506	2	68	1	4	164	56	2	3	3	22	30	1	6	50	6.5	2	1	2	0	0	0	0	0	2	1	1	0	1	3	0	0	0	5	1	0	7	0	20	1	20	0	1	1	1	2	2	79
507	2	57	1	4	163	52	2	3	3	22	30	1	7	0	6	0	1	1	0	0	0	0	0	0	0	0	0	0	4	0	0	0	6	2	0	7	1	10	2	30	1	1	1	1	1	1	95
508	2	66	1	4	163	64	2	3	3	21	0	3	6	0	8	2	2	3	0	0	0	1	0	2	1	0	0	1	4	3	13	0	5	1	0	7	1	0	1	0	1	1	1	1	2	1	93
509	2	81	1	4	158	60	2	3	1	22	0	1	6	30	8	0	3	3	0	0	0	0	0	0	0	0	0	0	4	0	0	0	7	2	30	7	2	0	3	30	0	1	1	1	1	1	92
510	2	70	1	3	153	70	1	3	3	23	0	1	7	0	8	0	0	0	0	0	0	0	0	0	0	0	0	0	4	0	0	0	0	0	0	0	0	0	6	0	0	1	1	1	1	1	91
511	2	66	1	4	164	70	1	3	1	22	0	2	6	0	7	0	0	3	0	0	0	0	0	0	0	0	0	0	2	0	0	0	0	0	0	6	1	0	3	0	1	1	1	1	1	1	85
512	2	75	1	3	160	60	1	3	2	21	0	1	6	30	7	0	1	1	0	0	0	0	0	0	0	0	0	0	1	0	0	0	1	1	0	7	1	0	3	10	0	1	1	1	1	1	87
513	2	70	1	2	157	51	1	3	1	21	30	1	7	30	8	0	0	0	0	2	0	0	0	0	1	0	0	0	3	1	1	10	7	1	30	7	1	30	2	30	1	1	1	1	1	1	84
514	2	58	1	2	158	50	1	3	3	26	0	4	6	30	3	3	3	3	0	0	0	0	0	0	3	0	0	0	4	7	0	0	7	3	0	7	3	0	3	0	1	1	1	1	1	1	90
515	2	58	1	2	156	50	1	3	3	21	30	4	6	5	1	0	0	0	0	0	0	0	0	0	1	0	0	0	1	0	0	0	7	1	40	0	0	0	5	0	1	1	1	1	1	1	95
516	2	76	1	4	166	67	2	3	3	25	30	4	7	0	4	3	3	3	2	1	0	3	2	3	3	0	0	2	4	0	0	0	0	0	0	7	1	0	10	30	1	1	1	1	3	2	80
517	2	70	1	2	165	55	1	3	3	21	30	3	6	20	7	0	0	0	0	0	0	0	0	0	1	0	0	0	1	0	0	0	5	1	30	7	1	30	3	10	0	1	1	1	1	1	78
518	2	64	1	4	162	60	1	3	3	21	30	2	5	30	6	3	3	3	0	0	0	0	0	3	1	0	0	0	4	0	0	0	0	0	0	0	0	0	3	0	0	1	1	1	1	1	77
519	2	78	2	2	163	59	1	3	3	22	0	3	7	0	9	0	2	2	0	0	0	0	0	0	1	0	0	0	1	0	0	0	7	2	0	7	1	0	2	0	1	1	1	1	1	1	90
520	2	71	1	4	170	70	2	3	3	23	0	2	11	0	7	0	0	1	0	0	0	1	0	0	0	0	0	0	2	7	2	0	1	0	2	7	1	0	4	0	1	1	1	1	1	1	90
521	2	77	1	4	154	56	2	3	2	20	0	1	6	0	7	1	1	1	1	1	0	0	1	2	1	0	0	1	4	1	10	0	1	1	0	7	0	40	4	0	1	1	1	1	2	2	72
522	2	77	1	2	162	60	1	3	3	22	30	1	5	0	6	0	0	0	0	0	0	0	0	0	1	0	0	0	1	0	0	0	0	0	0	7	1	0	3	30	0	1	1	1	1	1	72
523	2	72	1	2	161	67	1	3	3	24	0	2	7	0	6	1	1	1	0	2	0	0	0	0	2	0	0	0	4	0	0	0	0	0	0	7	1	30	5	0	0	1	1	1	1	1	80
524	2	65	1	2	162	80	1	3	3	22	30	1	7	0	8	0	0	2	0	1	0	2	0	0	0	0	0	0	1	0	0	0	7	1	0	7	2	0	6	0	0	1	1	1	1	1	88
525	1	74	1	2	165	75	2	3	3	22	0	1	6	0	6	0	1	2	0	0	0	0	1	0	1	0	0	0	4	2	1	0	1	1	0	7	1	10	3	10	0	1	1	1	1	1	91
526	1	68	1	2	182	80	1	3	3	22	0	2	6	0	8	0	2	2	0	0	0	0	0	0	1	0	0	0	4	0	0	0	0	0	0	7	4	0	2	0	0	1	1	1	1	1	90
527	1	67	1	4	180	75	1	1	1	23	0	2	5	30	6	2	0	0	0	0	0	0	0	0	1	0	0	0	4	0	0	0	0	0	0	7	1	0	5	0	0	1	1	1	1	1	82
528	1	92	2	3	177	65	1	3	3	22	30	3	6	0	5	3	3	3	0	0	0	0	0	0	2	0	0	0	1	0	0	0	0	0	0	7	1	0	5	0	1	1	1	1	1	1	83
529	2	84	1	4	152	62	2	3	1	22	30	2	7	30	8	1	0	3	0	0	0	0	0	3	1	0	0	1	4	0	0	0	7	1	0	2	0	30	3	0	1	1	1	1	2	2	70
530	2	72	1	4	160	67	2	3	1	22	30	1	6	30	7	0	0	3	0	0	0	0	0	0	0	0	0	0	4	2	2	0	5	2	0	7	2	0	3	0	1	1	1	1	1	1	100
531	1	66	1	4	170	75	2	1	1	22	0	2	6	30	7	0	0	1	0	0	0	0	0	0	1	0	0	0	2	0	0	0	7	2	0	7	2	0	5	0	0	1	1	1	1	1	82
532	1	77	1	2	167	80	2	2	1	21	30	1	5	0	7	0	1	1	0	2	0	0	2	0	1	0	0	0	3	0	0	0	5	5	30	7	1	10	5	0	1	1	1	1	1	1	91
533	1	80	1	3	173	75	3	3	3	22	30	2	7	30	9	0	0	0	0	0	0	0	0	0	1	0	3	0	3	1	1	10	1	1	10	6	3	30	1	30	1	1	1	1	1	1	91
534	1	70	1	4	169	72	2	2	2	23	0	1	6	30	7	0	1	1	0	0	0	1	1	0	1	0	0	0	4	0	0	0	7	2	0	3	1	0	5	0	1	1	1	1	1	2	81
535	1	70	1	2	160.8	65	2	3	3	22	0	2	6	0	7	0	0	3	0	3	0	0	0	0	0	0	0	0	4	0	0	0	0	0	0	7	1	0	5	0	0	1	1	1	1	1	97
536	1	82	1	4	171	67	2	3	3	22	0	1	6	30	8	0	0	3	0	0	0	0	0	0	0	0	0	0	1	0	0	0	0	0	0	7	1	0	6	0	1	1	1	1	1	1	86
537	2	72	1	4	157	58	3	3	1	23	0	1	7	30	7	1	0	3	0	0	0	0	0	0	1	0	0	0	4	0	0	0	1	0	30	7	1	0	5	0	1	1	1	1	2	1	55
538	1	71	1	4	169	71	2	3	1	22	0	1	6	30	7	0	0	0	0	0	0	0	0	0	0	0	0	0	4	1	2	0	3	1	30	7	3	30	3	10	0	1	1	1	1	1	96
539	1	67	1	4	172	82	2	3	3	21	30	1	5	30	5	0	2	2	0	2	0	0	2	0	1	0	0	0	4	7	2	30	7	2	0	7	3	0	4	0	1	1	1	1	1	1	94
540	1	67	1	4	176	85	2	3	3	22	0	1	7	0	8	0	0	2	0	0	0	0	0	0	1	0	0	0	2	7	1	0	2	1	0	6	1	0	1	0	0	1	1	1	1	1	92
541	1	65	1	4	169	80	2	3	1	22	30	3	7	18	6	0	2	2	0	0	0	0	0	0	1	0	0	0	1	0	0	0	0	0	0	0	0	0	3	30	1	1	1	1	1	1	92
542	1	71	2	3	178	70	2	3	1	24	40	2	6	0	6	0	3	3	0	2	0	3	1	0	1	0	0	0	4	3	0	0	5	3	0	6	2	0	3	0	1	1	1	1	1	1	85
543	1	62	1	4	177	70	2	3	1	21	0	1	6	0	8	0	1	1	1	1	0	3	0	1	1	0	0	0	2	2	1	0	2	1	0	6	1	30	1	0	1	1	1	1	1	1	85
544	1	62	1	4	177	70	2	3	3	22	0	2	6	0	7	3	3	3	0	0	0	0	0	0	1	0	0	0	2	0	0	0	0	0	0	7	2	0	4	0	0	1	1	1	1	1	80
545	1	71	1	4	173	70	2	3	1	21	0	2	6	0	6	0	2	3	0	0	0	0	0	0	1	0	0	0	4	7	4	0	7	4	0	7	4	0	3	0	1	1	1	1	2	1	81
546	1	71	1	2	175	60	1	3	3	21	0	1	7	0	7	0	0	0	0	0	0	0	0	0	1	0	0	0	2	0	0	0	0	0	0	7	0	0	7	0	0	1	1	1	1	1	82
547	1	64	2	2	178	78	1	3	3	22	0	1	6	30	8	0	0	1	0	0	0	0	0	0	0	0	0	0	4	0	0	0	3	2	0	7	2	0	4	0	0	1	1	1	1	1	100
548	1	52	1	3	168	85	1	3	1	22	30	2	5	30	6	2	2	3	0	2	0	2	0	0	1	0	0	0	4	7	1	40	5	2	40	7	2	30	2	50	1	1	1	1	1	1	73
549	1	69	1	2	169	90	2	3	1	22	0	2	6	0	6	1	3	3	0	1	0	0	0	1	2	0	3	0	1	0	0	0	7	4	0	0	0	0	0	0	1	1	1	1	1	1	75
550	1	65	1	4	178	65	2	2	1	21	30	3	3	30	4.5	3	2	2	0	0	0	0	0	0	2	0	0	0	4	0	0	0	7	3	0	7	1	0	6	0	1	1	1	1	1	1	70
551	1	62	1	4	173	85	2	2	1	22	0	2	6	0	7	1	2	3	2	1	0	0	0	0	1	0	0	0	3	3	1	3	3	1	0	5	1	0	2	0	1	2	1	1	1	1	94
552	1	59	1	4	172	81	2	1	1	22	30	2	8	0	8	0	0	1	0	3	0	0	0	0	0	0	0	0	4	0	0	0	0	0	0	2	1	20	3	50	1	1	1	1	1	1	99
553	1	78	1	4	166	65	2	3	3	21	30	2	6	0	8	0	0	1	0	0	0	0	0	0	1	0	0	0	2	0	0	0	0	0	0	7	0	0	2	0	0	1	1	1	1	1	61
554	1	65	1	4	186	72	2	1	3	21	0	1	6	0	7	0	0	0	0	0	0	0	0	0	0	0	0	0	3	0	0	0	5	2	0	7	2	0	3	0	0	1	1	1	1	1	100
555	1	62	1	2	172	80	2	3	1	21	30	4	6	0	3	3	3	3	0	3	0	0	3	0	2	0	0	1	4	0	0	0	0	0	0	0	0	0	3	0	1	1	1	1	1	2	59
556	1	67	1	4	173	73	2	3	3	22	30	1	5	0	3.5	0	3	3	0	0	0	2	0	0	1	0	0	0	1	0	0	0	7	2	0	0	0	0	2	0	1	1	1	1	1	1	65
557	1	66	1	2	165	60	2	2	1	21	0	1	6	0	8	0	0	0	0	0	0	0	0	0	0	0	0	0	1	0	0	0	7	1	0	7	2	0	2	0	0	1	1	1	1	1	85
558	2	64	1	4	156	55	3	3	1	22	0	2	6	30	8	0	1	2	0	2	0	0	0	0	0	0	0	0	4	0	0	0	0	0	0	0	0	0	3	0	0	1	1	1	1	1	72
559	1	78	1	2	160	70	2	3	3	21	30	4	6	0	6	3	3	3	0	0	0	0	0	3	2	0	0	1	1	0	0	0	0	0	0	0	0	0	3	0	1	1	1	1	3	2	68
560	1	74	1	2	164	80	1	3	3	21	0	1	5	0	7	0	0	2	1	0	0	0	3	0	1	0	0	0	4	7	1	0	0	0	0	7	1	0	2	0	1	1	1	1	1	1	81
561	1	73	1	2	170	60	1	3	3	22	0	2	6	0	8	0	0	1	0	0	0	0	0	0	0	0	0	0	1	0	0	0	0	0	0	7	1	0	4	0	0	1	1	1	1	1	68
562	1	64	1	3	172	67	1	2	1	22	30	2	6	0	6	1	2	0	0	1	0	0	0	0	1	0	0	0	4	3	2	0	1	4	0	7	2	0	2	30	1	1	1	1	1	1	83
563	2	63	2	3	162	63	1	3	1	23	0	1	7	0	8	0	3	3	0	0	0	2	0	2	1	0	0	0	3	0	0	0	0	0	0	0	0	0	2	0	0	1	1	1	1	1	78
564	1	68	1	4	176	80	2	3	1	22	0	1	7	0	8	0	0	0	0	0	0	0	0	0	0	0	0	0	4	0	0	0	5	2	0	7	2	0	3	0	1	1	1	1	1	1	89
565	1	73	1	4	175	70	2	2	3	21	0	2	6	20	8	0	2	2	0	0	0	0	0	0	1	0	0	1	1	0	0	0	0	0	0	7	4	55	3	0	0	1	1	1	1	1	85
566	1	63	1	4	175	85	3	1	1	22	0	2	5	0	7	0	0	1	0	0	0	0	0	0	0	0	0	0	2	7	2	0	7	2	0	5	2	0	4	0	0	1	1	1	1	1	86
567	1	69	1	4	175	70	2	3	1	22	0	1	6	0	8	0	3	3	0	0	0	0	0	0	0	0	0	0	1	5	2	0	3	2	0	7	1	30	4	0	0	1	1	1	1	1	92
568	1	68	1	2	176	86	1	3	3	23	0	1	7	0	7	0	0	0	0	0	0	0	0	0	0	0	0	0	1	0	0	0	0	0	0	7	1	30	6	0	1	1	1	1	1	1	80
569	1	62	2	3	160	55	1	3	3	22	0	2	6	0	6	0	2	2	0	0	0	0	1	0	1	0	0	0	3	0	0	0	0	0	0	7	2	30	3	30	1	1	1	1	1	1	67
570	1	78	1	2	165	70	1	3	3	22	30	2	5	0	7	0	3	3	0	0	0	0	1	0	1	0	0	0	1	0	0	0	0	0	0	7	1	0	2	0	1	1	1	1	2	1	82
571	1	50	1	2	170	83	1	3	1	23	0	1	7	0	7	0	0	0	0	3	0	0	0	0	0	0	3	0	4	0	0	0	0	0	0	0	0	0	3	30	0	1	1	1	1	1	71
572	1	64	1	4	177	75	2	2	1	23	0	2	6	0	5	2	2	3	2	0	0	0	1	3	2	0	0	1	4	0	0	0	0	0	0	7	2	0	5	0	1	1	1	1	3	2	81
573	1	68	1	4	178	70	2	3	3	22	30	3	6	30	7	0	0	0	0	0	0	0	0	0	1	0	0	0	1	0	0	0	7	1	30	7	1	30	2	30	0	1	1	1	1	1	81
574	1	72	1	4	180	80	1	1	3	22	30	1	7	30	8	0	0	3	0	2	0	0	0	2	0	0	0	0	4	0	0	0	0	0	0	5	0	30	6	30	1	1	1	1	1	1	97
575	1	57	1	4	166	75	1	3	1	23	0	1	6	0	6	2	2	3	1	1	1	0	1	0	2	0	0	0	4	3	1	0	6	1	0	6	1	0	1	0	1	3	3	2	2	2	80
576	1	67	1	4	178	75	2	3	3	21	20	1	6	0	7	0	0	1	0	0	0	0	0	0	0	0	0	0	2	0	0	0	0	0	0	7	1	30	3	30	0	1	1	1	1	1	97
577	1	58	1	4	170	63	1	3	3	22	0	2	5	0	7	0	1	0	0	0	0	0	0	0	1	0	0	0	4	7	4	0	7	4	0	7	3	0	1	0	0	1	1	1	1	1	80
578	1	77	1	2	173	65	1	3	3	21	0	2	5	0	5	0	3	0	0	0	0	0	0	1	3	0	0	0	1	0	0	0	0	0	0	7	1	0	6	0	0	1	1	1	1	1	83
579	1	72	1	4	178	80	2	3	1	21	30	3	6	30	6	2	2	2	0	0	0	0	0	0	1	1	0	0	4	3	1	0	7	1	0	7	1	0	0	0	1	1	1	1	1	1	86
580	1	58	1	4	176	84	2	3	1	21	30	2	6	0	6	2	3	3	0	2	0	0	2	0	1	0	0	0	4	2	1	0	5	1	0	6	1	0	2	0	1	1	1	1	1	1	85
581	1	53	1	4	172	70	2	3	1	22	50	1	6	30	7	0	0	0	0	3	0	0	0	0	0	0	0	0	4	1	0	30	4	1	30	0	0	0	5	0	0	1	1	1	1	1	86
582	1	72	1	4	176	82	2	3	1	21	30	1	6	10	7	0	0	0	0	0	0	0	0	0	1	0	0	0	1	0	0	0	6	1	30	7	1	30	2	30	0	1	1	1	1	1	90
583	1	69	1	3	170	67	1	3	3	21	0	1	7	0	8	0	0	0	0	0	0	0	0	0	1	0	0	0	1	2	1	0	7	1	30	5	1	0	4	0	0	1	1	1	1	1	100
584	1	56	1	3	172	80	1	3	3	21	30	1	5	30	6	0	1	1	0	0	0	0	0	0	0	0	0	0	4	1	2	0	3	1	26	7	2	2	3	30	0	1	1	1	1	1	90
585	1	71	1	2	164	51	1	3	3	22	0	1	6	0	6	0	1	1	0	0	0	0	0	0	0	0	0	0	1	0	0	0	0	0	0	7	1	30	3	30	0	1	1	1	1	1	82
586	1	72	1	4	165	65	1	3	2	21	30	3	7	0	8	3	0	3	0	0	0	0	0	0	1	0	0	2	1	0	0	0	0	0	0	0	0	0	5	0	1	1	1	1	2	2	50
587	2	68	1	4	160	68	2	3	1	22	30	1	6	0	7	0	0	3	0	0	0	0	0	0	0	0	0	0	4	0	0	0	0	0	0	0	0	0	4	0	1	1	1	1	2	1	96
588	1	64	1	3	167	70	2	1	2	23	0	3	6	50	7	1	1	3	0	1	0	0	0	0	1	0	0	0	4	0	0	0	0	0	0	7	1	0	5	0	1	1	1	1	1	1	95
589	1	72	1	2	165	70	1	3	3	22	0	2	6	0	5	1	1	1	0	0	0	0	2	0	1	0	0	0	4	0	0	0	0	0	0	7	3	0	5	0	1	1	1	1	1	1	99
590	1	71	1	3	165	66	1	3	1	23	0	1	8	0	7	0	0	1	0	0	0	0	0	0	0	0	0	0	3	0	0	0	5	1	0	5	1	0	2	0	0	1	1	1	1	1	75
591	1	63	1	3	173	76	1	1	1	22	0	1	6	30	8	0	0	0	0	0	0	0	2	0	1	0	3	0	4	0	0	0	0	0	0	7	1	30	1	30	1	1	1	1	1	1	82
592	1	58	1	4	170	69	2	3	1	22	30	1	6	30	8	0	0	0	0	0	0	0	0	0	0	0	0	0	4	2	1	30	2	1	30	7	2	37	3	30	0	1	1	1	1	1	82
593	1	65	1	4	167	67	2	3	3	22	30	1	6	10	5	0	1	1	0	0	0	0	1	0	1	0	0	1	3	1	2	0	1	2	0	7	2	0	2	30	1	1	1	1	1	1	88
594	1	68	1	4	166	74	3	3	3	21	30	1	5	30	6	0	3	3	0	0	0	0	0	0	1	0	0	0	1	0	0	0	0	0	0	0	0	0	1	0	0	1	1	1	1	1	82
595	1	77	1	4	170	70	2	3	3	22	0	1	6	30	7	0	0	0	0	0	0	0	0	0	0	0	0	0	1	0	0	0	7	1	0	7	1	0	5	30	0	1	1	1	1	1	83
596	1	75	1	2	165	55	1	3	3	21	30	4	6	30	4	3	3	3	0	3	0	0	0	0	2	0	0	1	1	0	0	0	0	0	0	0	0	0	4	0	0	1	1	1	2	1	65
597	1	75	1	2	172	55	1	3	1	22	0	2	7	0	6	2	2	1	2	2	0	0	0	2	1	0	0	0	2	0	0	0	3	1	0	5	1	0	3	0	0	1	1	1	1	1	80
598	1	74	1	4	165	70	1	3	3	22	30	3	6	0	8	3	2	1	0	0	0	0	0	0	1	0	0	0	1	7	3	0	7	3	0	7	2	0	6	0	1	1	1	1	2	1	70
599	1	81	1	4	170	72	2	3	3	21	0	1	6	0	8	0	0	2	0	0	0	0	0	0	0	0	0	0	1	7	2	0	0	0	0	7	2	0	4	30	0	1	1	1	1	1	83
600	1	75	1	4	164	65	3	3	3	22	30	2	6	0	7	3	3	3	0	3	0	0	0	0	1	3	0	0	1	0	0	0	0	0	0	0	0	0	2	0	1	1	1	1	1	1	82
601	1	72	1	2	162	87	1	3	3	22	10	2	7	0	7	0	0	3	0	0	0	0	1	0	1	0	0	0	1	0	0	0	0	0	0	7	1	0	6	0	0	1	1	1	1	1	83
602	1	66	1	3	169	62	1	2	1	22	0	2	6	0	7	1	1	2	1	0	0	0	0	0	1	0	0	0	2	0	0	0	0	0	0	6	2	0	2	20	0	1	1	1	1	1	87
603	1	68	1	3	170	80	2	3	3	22	0	1	6	0	6	0	0	1	0	0	0	0	0	0	1	0	0	0	2	0	0	0	0	0	0	7	1	30	3	30	0	1	1	1	1	1	90
604	1	53	1	1	165	70	1	2	3	23	0	2	6	0	6	0	0	0	0	0	0	0	0	0	1	0	0	0	1	5	1	0	7	1	0	0	0	0	0	0	1	1	1	1	1	1	100
605	1	77	1	4	175	42.5	2	3	2	22	30	1	6	30	6	0	3	3	0	3	0	0	1	0	3	0	0	1	4	0	0	0	7	1	0	7	1	0	5	0	1	1	1	1	2	1	70
606	1	62	1	3	168	65	2	3	1	23	0	2	7	0	8	0	0	0	0	0	0	0	0	0	0	0	0	0	4	0	0	0	7	2	0	7	2	0	3	0	0	1	1	1	1	1	90
607	1	74	1	4	180	67	1	3	3	22	30	1	6	30	7	0	0	0	0	0	0	0	0	0	1	0	0	0	1	0	0	0	1	1	30	2	1	30	2	30	1	2	1	1	1	1	81
608	1	68	1	2	172	75	2	3	3	22	0	2	6	30	8	0	2	2	0	0	0	0	0	0	1	0	0	0	1	0	0	0	0	0	0	7	1	30	1	30	1	1	1	1	1	1	81
609	1	73	1	2	173	70	2	1	1	21	0	4	6	30	7	3	0	0	0	0	0	2	0	0	2	0	0	0	4	0	0	0	7	0	45	7	0	45	6	0	1	1	1	1	1	1	80
610	1	85	1	4	168	62	2	3	3	22	30	1	6	30	7	0	0	0	0	0	0	0	0	0	1	0	0	0	1	0	0	0	5	1	30	6	1	30	2	30	0	1	1	1	1	1	87
611	1	85	1	4	168	73	2	3	3	22	0	1	7	30	8	0	0	0	0	0	0	0	0	0	0	0	0	0	1	0	0	0	0	0	0	7	1	0	0	0	1	1	1	1	1	1	66
612	1	64	1	3	180	100	1	2	1	22	30	4	6	30	6	3	3	3	0	0	0	3	0	0	1	3	0	0	4	7	0	30	7	0	30	7	1	0	8	0	1	1	1	1	1	1	90
613	1	60	1	4	177	59	2	3	3	22	0	3	6	30	6	3	1	1	0	0	0	0	0	0	1	0	0	0	1	0	0	0	0	0	0	6	2	10	2	15	0	1	1	1	1	1	73
614	1	62	1	3	160	90	1	3	3	21	30	1	7	10	7	0	0	0	0	0	0	0	0	0	1	0	0	0	1	0	0	0	7	1	30	7	1	30	3	20	0	1	1	1	1	1	78
615	1	79	1	4	171	65	2	3	1	22	30	3	6	30	7	0	0	0	0	0	0	0	0	0	1	0	0	0	1	0	0	0	7	1	30	6	1	30	3	10	1	1	1	1	1	1	80
616	1	63	1	4	170	75	2	3	1	22	0	1	6	30	7	0	0	3	0	0	0	0	0	0	0	0	0	0	1	0	0	0	0	0	0	0	0	0	3	0	0	1	1	1	1	1	73
617	1	69	1	4	180	85	3	3	3	22	0	1	5	0	6	1	1	1	0	0	0	0	0	1	1	1	0	0	1	2	0	30	5	1	0	7	1	0	6	0	0	1	1	1	1	1	100
618	1	56	1	4	170	68	2	3	1	22	30	1	7	30	8	0	2	0	0	0	0	0	0	0	1	0	0	0	4	6	2	30	6	2	30	7	1	0	6	0	0	1	1	1	1	1	90
619	1	73	1	3	171	75	1	1	1	24	0	2	6	30	5	1	0	0	0	0	2	0	0	0	1	0	0	0	4	0	0	0	0	0	0	7	2	0	5	0	1	1	1	1	1	1	82
620	1	58	1	3	170	80	1	1	3	21	30	3	6	30	8	0	0	0	0	0	0	0	0	0	1	0	0	0	1	0	0	0	7	1	30	7	1	30	3	20	0	1	1	1	1	1	89
621	1	58	1	3	170	75	2	3	3	21	30	1	6	10	7	0	0	0	0	0	0	0	0	0	1	0	0	0	1	1	1	30	5	1	30	6	1	30	2	30	0	1	1	1	1	1	90
622	1	73	1	2	170	85	2	3	3	22	10	1	4	40	6	0	0	0	0	0	0	0	0	0	1	0	0	0	1	0	0	0	5	1	30	7	1	30	1	30	0	1	1	1	1	1	89
623	1	73	1	2	170	85	2	3	3	22	0	1	4	30	6	0	1	1	0	0	0	0	0	0	0	0	0	0	1	1	1	0	3	1	30	7	1	30	3	30	0	1	1	1	1	1	83
624	1	73	1	2	170	80	2	3	3	22	30	3	5	30	7	0	0	0	0	0	0	0	0	0	1	0	0	0	1	0	0	0	6	1	30	7	1	30	2	30	0	1	1	1	1	1	87
625	1	67	1	3	175	70	1	3	3	23	0	2	5	0	5	1	1	1	0	0	0	0	0	0	1	0	0	0	4	0	0	0	0	0	0	7	1	30	5	0	0	1	1	1	1	1	82
626	1	67	1	2	175	70	1	3	3	23	0	2	5	0	5	1	2	2	0	0	0	0	0	0	1	2	0	0	4	0	0	0	0	0	0	7	2	0	5	0	0	1	1	1	1	1	82
627	1	67	1	4	173	88	2	3	3	21	30	2	6	30	8	0	0	0	0	0	0	0	0	0	0	0	0	0	1	0	0	0	7	1	30	7	3	0	2	30	0	1	1	1	1	1	86
628	1	83	1	4	165	65	1	3	3	22	0	1	5	0	6	0	0	1	0	0	0	0	0	0	0	0	0	0	1	0	0	0	0	0	0	7	1	30	3	30	0	1	1	1	1	1	89
629	1	69	2	4	172	70	1	3	3	22	0	2	5	0	7	0	2	2	0	0	0	0	0	0	1	0	0	0	3	0	0	0	0	0	0	7	3	0	4	0	1	1	1	1	1	1	89
630	1	70	1	4	173	80	2	3	3	21	0	1	6	0	9	0	0	0	0	0	0	0	0	0	0	0	0	0	1	0	0	0	7	3	0	7	3	0	3	0	0	1	1	1	1	1	95
631	1	74	1	3	170	70	1	3	3	22	0	4	6	0	7	0	1	1	0	0	0	0	0	0	1	0	0	0	2	0	0	0	0	0	0	7	1	0	3	10	0	1	1	1	1	1	75
632	1	62	1	3	173	70	2	3	3	21	0	2	5	30	8	0	0	0	0	1	0	0	0	0	0	0	0	0	1	1	1	0	7	1	30	0	0	0	3	0	0	1	1	1	1	1	92
633	1	71	1	2	167	70	1	3	1	22	0	3	6	0	7	0	3	3	0	0	0	0	0	0	1	0	0	0	4	0	0	0	0	0	0	7	2	0	4	0	0	1	1	1	1	1	88
634	1	71	1	2	167	70	1	3	1	22	0	3	6	0	7	0	3	3	0	0	0	0	0	0	1	0	0	0	4	0	0	0	0	0	0	7	2	0	4	0	0	1	1	1	1	1	88
635	1	68	1	4	180	75	1	3	1	23	0	1	7	30	8	0	0	0	0	0	0	0	0	0	0	0	0	0	1	0	0	0	7	2	30	7	2	30	2	30	0	1	1	1	1	1	88
636	1	67	1	4	176	80	1	3	3	22	30	1	6	30	6	0	0	1	0	0	0	0	0	0	0	0	0	0	2	0	0	0	0	0	0	7	1	30	3	30	1	1	1	1	1	1	93
637	1	68	1	3	170	80	1	3	3	22	30	1	6	30	8	0	0	0	0	0	0	0	0	0	1	0	0	0	1	0	0	0	6	1	30	7	1	30	3	20	0	1	1	1	1	1	81
638	1	56	1	1	166	60	1	3	3	21	0	4	5	30	8	0	1	1	1	0	0	0	0	0	1	0	0	0	4	7	8	0	7	8	0	7	8	0	3	0	0	1	1	1	1	1	88
639	1	75	1	2	170	80	1	2	3	21	0	1	6	0	6	0	0	3	0	0	0	0	2	0	1	0	2	1	4	0	0	0	7	1	45	7	1	0	12	0	1	2	1	1	2	2	45
640	1	72	1	3	163	70	2	3	3	22	0	1	6	0	7	0	0	0	0	0	0	0	0	0	0	0	0	0	2	0	0	0	1	1	0	7	1	0	3	0	0	1	1	1	1	1	88
641	1	69	1	4	170	70	1	3	3	22	0	1	6	0	7	0	0	1	0	0	0	0	0	0	1	0	0	0	4	0	0	0	0	0	0	7	2	0	3	0	1	1	1	1	1	1	87
642	1	69	1	4	184	55	2	3	3	22	30	1	6	50	6	0	0	0	0	0	0	0	0	0	0	0	0	0	2	0	0	0	0	0	0	7	1	30	3	30	0	1	1	1	1	1	89
643	1	69	1	4	170	70	1	3	2	22	0	2	5	0	5	1	1	3	0	0	0	0	0	0	1	0	0	0	2	0	0	0	7	2	0	0	0	0	2	0	1	1	1	1	1	2	56
644	1	68	1	3	165	60	2	3	3	20	0	3	4	30	6	2	2	1	0	0	0	0	0	0	0	0	0	2	1	0	0	0	7	1	0	7	2	0	3	0	0	1	1	1	1	1	85
645	1	68	1	2	164	55	2	1	3	21	30	1	6	30	7	0	0	0	0	0	0	0	0	0	1	0	0	0	1	0	0	0	6	1	30	5	1	30	3	10	0	1	1	1	1	1	85
646	1	67	1	4	169	77	3	3	1	22	0	1	6	0	8	0	1	2	0	0	0	0	0	0	0	0	0	0	4	0	0	0	0	0	0	7	1	0	0	20	0	1	1	1	1	1	91
647	1	66	1	4	169	65	2	3	2	21	30	1	5	0	6	0	3	3	0	0	0	0	0	0	1	0	0	1	4	0	0	0	6	1	0	3	0	30	2	0	1	1	1	1	1	1	79
648	1	64	1	3	170	71	1	3	3	21	0	1	5	0	7	0	0	0	0	0	0	0	0	0	1	0	0	0	1	3	1	0	6	1	0	7	3	0	6	0	0	1	1	1	1	2	95
649	2	59	1	3	160	50	1	1	1	22	0	2	6	0	7.5	0	0	2	0	0	0	0	0	0	0	0	0	0	4	0	0	0	7	1	30	0	0	0	2	30	0	1	1	1	1	1	86
650	1	69	1	3	172	80	2	3	3	22	0	1	6	0	7	0	3	3	0	3	0	0	0	0	1	0	0	0	1	0	0	0	0	0	0	0	0	0	4	0	0	1	1	1	1	1	67
651	1	69	1	2	176	80	1	3	3	22	0	1	7	0	8	0	0	2	0	0	0	0	0	0	1	0	0	0	4	0	0	0	7	1	0	7	1	30	5	0	0	1	1	1	1	1	90
652	1	68	1	3	170	79	1	3	1	21	0	2	7	0	8	0	0	3	0	3	0	2	0	2	0	0	0	0	4	0	0	0	7	1	0	7	1	0	5	0	1	1	1	1	1	1	90
653	1	64	1	4	170	69	1	3	1	21	30	2	5	40	7	0	1	3	0	0	0	0	0	0	1	0	0	0	4	1	0	40	6	1	40	0	0	0	3	0	1	1	1	1	2	1	90
654	1	64	1	4	170	71	2	3	2	21	30	1	5	25	7	0	0	3	0	0	0	2	0	0	1	0	0	0	4	0	0	0	7	1	30	7	1	5	3	20	1	1	1	1	2	1	90
655	1	64	1	2	170	75	1	2	2	21	0	1	6	0	7	0	0	3	3	3	0	0	0	0	0	0	0	0	1	0	0	0	0	0	0	7	1	0	4	0	1	1	1	1	1	1	99
656	1	63	1	3	175	70	1	3	3	21	0	2	6	30	7	1	0	1	0	0	0	0	0	0	1	0	0	0	3	0	0	0	0	0	0	0	0	0	6	0	0	1	1	1	1	2	66
657	1	77	1	4	170	72	1	3	3	22	0	1	5	30	7	0	0	1	0	0	0	0	0	0	0	0	0	0	2	0	0	0	0	0	0	7	1	30	3	30	0	1	1	1	1	1	88
658	1	75	1	3	173	72	2	3	3	23	0	4	5	0	5	3	3	3	0	0	0	0	0	0	1	0	0	0	4	0	0	0	0	0	0	7	1	0	5	0	1	2	2	2	2	1	85
659	1	74	1	3	168	65	1	3	3	22	0	1	5	30	6	0	0	0	0	0	0	0	0	0	0	0	0	0	2	0	0	0	0	0	0	7	1	30	3	0	0	1	1	1	1	1	84
660	1	74	1	2	175	72	1	1	1	21	30	2	5	30	5	1	1	1	0	0	0	0	0	0	1	0	0	0	4	0	0	0	0	0	0	7	2	0	5	0	0	1	1	1	1	1	80
661	1	70	1	2	173	65	1	3	2	21	30	1	5	0	8	0	3	3	1	1	3	1	0	1	0	0	0	1	4	3	2	30	0	0	0	0	0	0	2	30	1	2	1	1	2	2	62
662	1	70	1	3	172	73	1	1	1	22	10	1	6	10	7	0	0	0	0	0	0	0	0	0	0	0	0	0	2	2	1	10	2	1	10	5	2	10	2	0	1	1	1	1	1	1	92
663	1	68	1	4	168	80	2	2	1	26	30	1	7	30	5	0	3	2	3	3	3	0	0	2	2	0	2	1	1	1	1	30	4	1	0	7	1	0	5	0	0	1	1	1	1	1	80
664	1	67	1	4	176	81	2	3	2	22	0	3	6	37	6	2	2	3	0	0	0	0	0	0	1	0	0	1	4	0	0	0	7	5	0	5	1	0	2	0	0	1	1	1	1	2	91
665	1	66	1	4	173	80	2	3	3	22	0	1	7	0	8	0	0	2	0	1	0	0	0	2	0	2	0	0	2	3	1	0	5	1	0	7	1	0	2	0	0	1	1	1	1	1	89
666	1	64	1	3	176	80	2	3	3	21	0	2	6	30	6	3	3	3	0	3	3	0	0	3	1	0	0	1	1	0	0	0	0	0	0	0	0	0	0	0	1	1	1	1	1	3	61
667	1	62	1	4	171	66	2	3	1	22	0	2	6	30	4.5	1	1	1	0	3	0	0	0	0	1	0	0	0	4	0	0	0	7	1	0	0	0	0	7	0	1	1	1	1	1	1	80
668	1	60	1	3	169	53	1	1	1	22	0	2	6	0	8	0	2	2	0	0	0	0	0	0	1	0	0	0	4	0	0	0	0	0	0	7	1	0	4	0	1	1	1	1	1	1	90
669	1	60	1	3	172	70	1	3	3	22	0	1	6	0	6	0	1	1	0	0	0	0	0	0	0	0	0	0	2	0	0	0	0	0	0	7	2	30	3	30	0	1	1	1	1	1	94
670	1	60	1	3	172	70	1	1	1	22	10	2	5	20	7	0	0	0	0	1	0	0	0	0	1	0	0	1	2	1	1	0	1	1	10	3	1	0	3	30	0	1	1	1	1	2	79
671	1	73	1	3	180	96	1	2	2	21	30	3	6	30	7	1	0	1	0	0	0	0	0	0	0	0	3	0	1	0	0	0	7	2	0	7	1	0	4	0	0	1	1	1	1	1	90
672	1	71	1	2	167	90	3	3	1	21	0	2	5	0	8	0	2	2	0	0	0	0	0	0	1	0	3	0	1	0	0	0	7	2	0	7	1	0	2	0	0	2	1	1	2	1	83
673	1	71	1	3	170	85	2	3	1	20	0	2	6	0	7	1	1	1	0	2	0	0	1	0	1	0	2	0	1	0	0	0	0	0	0	7	2	0	2	0	1	1	1	1	1	1	89
674	1	60	1	4	176	74	1	3	3	21	0	1	7	0	6	0	0	0	0	0	0	0	0	0	0	0	0	0	1	0	0	0	0	0	0	0	0	0	4	0	0	1	1	1	1	1	89
675	1	67	1	2	170	70	1	3	1	21	0	1	5	0	7	0	2	2	0	0	0	0	1	0	0	0	3	0	1	0	0	0	0	0	0	7	3	0	2	0	0	1	1	1	1	1	80
676	1	67	1	2	170	70	1	3	1	21	0	1	5	0	7	0	2	2	0	0	0	0	1	0	0	0	3	0	1	0	0	0	0	0	0	7	3	0	2	0	0	1	1	1	1	1	80
677	1	80	1	4	168	51	1	3	3	20	0	3	6	5	6	3	3	3	0	0	0	0	0	0	2	0	0	0	4	0	0	0	0	0	0	7	2	0	1	0	0	1	1	1	1	1	90
678	1	74	1	4	170	65	2	2	1	22	0	1	8	0	6	0	0	2	0	0	0	0	0	0	1	0	0	1	1	7	3	30	1	1	30	7	0	40	2	0	1	1	1	1	1	1	90
679	1	73	1	3	175	75	2	3	3	22	30	1	5	30	7	0	0	3	0	3	0	0	0	0	1	0	0	0	4	0	0	0	0	0	0	7	1	30	6	0	1	1	1	1	1	1	95
680	1	63	1	4	167	60	1	3	3	21	0	1	5	30	8	0	0	0	0	0	0	0	0	0	0	0	0	0	3	7	3	0	2	3	0	0	0	0	2	0	0	1	1	1	1	1	85
681	1	68	1	3	176	75	2	3	3	21	0	1	6	0	6	0	0	2	0	0	0	0	0	0	0	0	0	0	1	0	0	0	7	3	0	0	0	0	0	0	0	1	1	1	1	1	100
682	1	54	1	2	182	57	1	1	3	21	0	1	6	0	6	0	0	1	0	0	0	0	0	0	1	0	0	0	4	0	0	0	7	1	0	0	0	0	2	30	0	1	1	1	1	1	74
683	1	55	1	3	170	80	1	1	1	23	0	1	6	0	7	0	0	0	0	0	0	0	0	0	0	0	0	0	1	0	0	0	7	1	0	7	1	0	6	0	0	1	1	1	1	1	93
684	1	71	1	4	168	65	1	3	1	23	0	2	6	30	7	1	2	2	0	0	0	0	0	1	1	0	0	0	4	2	1	0	3	1	0	3	1	0	4	0	0	1	1	1	2	2	83
685	1	70	1	4	178	77	2	3	1	23	30	2	6	30	5.5	1	1	3	0	0	0	0	0	0	0	0	0	0	4	0	0	0	7	1	30	0	0	0	2	30	0	1	1	1	2	1	80
686	2	68	1	4	163	63	2	3	1	23	15	4	7	30	6.5	3	1	2	0	0	0	0	0	3	1	0	0	0	4	0	0	0	7	1	30	0	0	0	2	30	1	1	1	1	2	1	70
687	1	65	1	2	172	75	1	3	3	21	30	2	7	0	7	0	0	3	0	0	0	0	0	0	2	0	0	0	1	7	0	0	7	0	0	7	1	30	1	0	0	1	1	1	1	1	86
688	1	58	1	3	170	60	1	3	3	22	0	1	6	0	6	0	1	1	0	0	0	0	0	0	0	0	0	0	2	1	1	0	3	1	0	7	1	30	3	0	0	1	1	1	1	1	91
689	1	74	1	3	165	63	2	3	3	22	10	1	6	30	8	0	1	1	0	0	0	0	2	0	1	0	0	0	2	2	1	20	6	1	30	7	2	10	2	30	0	1	1	1	1	1	94
690	1	69	1	2	168	70	2	1	1	23	0	4	6	0	3	3	3	3	0	0	0	0	0	3	2	0	3	3	1	0	0	0	0	0	0	0	0	0	0	0	1	1	1	1	2	2	47
691	1	75	1	4	177	85	1	3	1	22	0	1	6	0	7	0	0	0	0	3	0	0	0	0	1	0	0	0	4	0	0	0	7	1	0	0	0	0	2	0	1	2	1	1	2	1	70
692	2	72	1	4	153	75	1	2	1	22	0	1	5	0	6.5	0	0	3	0	3	0	0	0	0	1	0	0	0	4	0	0	0	7	1	0	0	0	0	2	0	1	2	1	1	1	1	75
693	2	67	1	2	172	80	2	1	2	20	0	1	4	0	8	0	1	3	3	3	0	0	0	0	0	0	0	2	3	0	0	0	7	0	40	0	0	0	6	30	1	1	1	1	2	2	65
694	1	78	1	4	172	79	2	3	3	22	30	1	5	30	7	0	0	0	0	0	0	0	0	0	1	0	0	0	1	0	0	0	5	1	30	6	1	30	2	30	0	1	1	1	1	1	75
695	1	75	1	1	170	60	1	3	3	22	0	1	5	0	6	0	1	1	0	0	0	0	0	0	0	0	0	0	2	0	0	0	0	0	0	7	1	0	3	30	0	1	1	1	1	1	81
696	1	75	1	1	170	63	1	3	3	22	0	1	5	0	6	0	1	1	0	0	0	0	0	0	0	0	0	0	2	0	0	0	4	1	0	7	1	40	3	30	0	1	1	1	1	1	82
697	1	70	1	2	170	80	1	3	3	21	30	3	5	30	7	0	0	0	0	0	0	0	0	0	1	0	0	0	1	0	0	0	7	1	30	2	1	30	3	30	0	1	1	1	1	1	85
698	1	70	1	2	172	60	1	3	3	21	0	2	5	0	6	1	1	2	0	0	0	0	2	0	1	0	0	0	3	0	0	0	0	0	0	7	0	30	5	0	0	1	1	1	1	1	85
699	1	70	1	2	171	79	2	3	1	21	10	3	4	30	6	3	3	3	3	3	3	0	0	2	1	0	3	0	1	0	0	0	0	0	0	7	4	0	4	0	1	1	1	1	3	1	40
700	1	75	1	2	172	70	2	2	1	22	0	2	6	30	7	0	0	0	0	0	0	0	0	0	1	0	0	0	4	0	0	0	0	0	0	7	2	0	6	0	0	1	1	1	1	1	70
701	1	72	1	3	170	75	1	1	1	22	0	2	6	0	6	3	2	2	0	0	0	0	0	2	2	0	0	0	4	0	0	0	0	0	0	7	2	0	5	0	0	1	1	1	1	1	83
702	1	70	1	2	167	60	1	3	3	22	0	2	5	0	6	2	3	1	0	0	0	0	0	0	1	0	0	0	4	0	0	0	0	0	0	5	1	0	6	0	1	1	1	1	1	1	86
703	1	67	1	2	160	60	1	3	3	22	0	2	7	0	5	3	0	0	0	0	0	0	0	0	0	0	0	0	1	0	0	0	0	0	0	0	0	0	0	0	0	1	1	1	1	1	100
704	1	67	1	3	186	93	2	2	1	23	0	1	4	30	5	0	0	3	0	0	0	0	0	0	1	0	0	0	4	0	0	0	0	0	0	7	1	0	3	0	1	1	1	1	1	1	85
705	1	83	1	4	168	60	3	3	3	21	30	2	5	30	6	3	3	3	0	0	0	0	0	0	1	0	0	1	1	0	0	0	0	0	0	0	0	0	2	0	0	1	1	1	1	1	81
706	1	74	1	4	168	90	2	3	1	21	10	1	6	10	9	0	0	3	0	3	0	0	0	0	0	0	0	0	1	7	2	10	7	2	0	7	1	0	2	0	0	1	1	1	1	1	94
707	1	73	1	4	178	80	2	3	3	21	30	1	5	30	7	0	0	0	0	0	0	0	0	0	1	0	0	0	1	0	0	0	6	1	30	7	1	30	2	30	0	1	1	1	1	1	88
708	1	73	1	4	160	60	3	3	3	25	0	1	7	0	6	0	3	3	0	0	0	0	0	0	2	0	0	0	2	0	0	0	0	0	0	0	0	0	2	0	0	1	1	1	1	1	79
709	1	72	1	4	178	83	2	3	3	23	0	1	6	30	7	0	1	1	0	1	0	0	0	0	0	0	0	0	4	1	1	30	3	1	30	7	1	30	3	30	0	1	1	1	1	1	81
710	1	71	1	4	170	70	2	3	3	22	0	1	7	0	7	0	1	1	0	0	0	0	0	0	0	0	0	0	1	1	1	0	2	1	30	7	1	0	2	13	0	1	1	1	1	1	83
711	2	70	1	3	160	78	1	3	1	22	0	1	5	0	7	0	1	1	0	0	2	0	0	0	1	0	0	0	4	0	0	0	7	1	0	7	4	0	4	0	1	1	1	1	4	1	80
712	1	69	1	4	185	90	2	2	1	22	0	3	7	0	8	0	3	3	0	0	0	2	0	3	2	3	0	1	3	6	1	10	6	1	10	6	1	0	5	30	1	1	1	1	3	1	61
713	1	69	1	4	172	75	1	1	1	22	0	2	6	0	7.5	0	3	3	0	0	0	0	0	0	1	0	0	0	3	0	0	0	7	2	0	0	0	0	4	30	0	1	1	1	2	1	80
714	1	65	1	3	170	70	2	1	3	21	0	2	5	0	8	0	1	1	0	0	0	0	0	0	1	0	0	0	1	0	0	0	0	0	0	7	2	0	0	0	0	1	1	1	1	1	91
715	1	65	1	2	174	74	2	3	1	20	0	4	6	0	8	3	2	2	0	0	0	0	0	0	1	0	0	0	4	0	0	0	0	0	0	0	0	0	5	0	0	1	1	1	1	1	80
716	1	64	1	4	180	90	3	3	3	21	30	3	6	30	8	0	0	0	0	0	0	0	0	0	1	0	0	0	1	0	0	0	7	1	30	7	1	30	3	20	0	1	1	1	1	1	82
717	1	61	1	3	172	90	1	3	3	22	0	4	7	0	8	3	3	3	0	3	0	0	0	0	0	0	0	0	4	0	0	0	0	0	0	7	1	0	5	0	1	1	1	1	1	1	90
718	1	74	1	4	170	90	2	1	1	22	0	3	6	40	8	2	1	2	2	3	0	0	0	0	1	0	3	0	4	2	1	30	7	1	0	0	0	0	5	0	1	1	1	1	1	1	60
719	1	71	1	2	169	60	1	3	3	22	0	1	6	0	6	0	0	1	0	0	0	0	0	0	0	0	0	0	1	1	1	0	0	0	0	7	1	30	3	30	0	1	1	1	1	1	80
720	2	71	1	4	160	65.5	2	3	1	22	30	2	6	0	6	0	2	3	0	1	0	0	0	2	1	0	0	1	4	0	0	0	3	1	0	0	0	0	4	30	1	1	1	1	3	2	60
721	1	70	1	4	168	65	1	2	1	20	0	1	4	30	7.5	0	0	0	0	0	0	0	0	0	0	0	0	0	1	0	0	0	0	0	0	7	1	0	3	0	0	1	1	1	1	1	100
722	1	64	1	4	173	91	2	3	3	23	0	1	7	0	8	0	0	0	0	3	0	0	0	0	1	0	0	0	4	0	0	0	0	0	0	7	2	0	4	0	0	1	1	1	1	1	81
723	2	63	1	3	158	63	1	3	1	21	0	3	3	0	6	2	3	2	0	2	2	1	0	2	2	1	1	2	4	7	1	0	0	0	0	7	1	0	1	0	1	2	1	1	2	2	65
724	1	62	1	3	172	70	1	3	1	24	0	3	7	30	6	1	2	0	0	0	0	0	0	0	1	0	0	0	4	0	0	0	0	0	0	7	1	30	5	0	0	1	1	1	1	1	79
725	1	59	1	3	176	70	1	1	3	21	0	2	6	0	7	1	1	1	0	0	0	0	0	0	0	0	0	1	4	0	0	0	0	0	0	7	2	0	5	0	0	1	1	1	1	1	77
726	1	83	1	2	160	70	1	3	3	21	30	1	6	30	8	0	0	0	0	0	0	0	0	0	1	0	0	0	1	1	3	30	7	3	10	5	1	30	3	10	0	1	1	1	1	1	71
727	1	80	1	2	165	52	1	3	1	20	0	1	6	0	8	0	0	0	0	0	0	0	0	0	0	0	0	0	3	0	0	0	0	0	0	0	0	0	4	0	0	1	1	2	1	1	95
728	1	72	1	2	180	81	2	2	1	22	0	1	5	30	6	0	1	2	0	0	0	1	0	1	1	0	0	0	2	0	0	0	7	1	30	7	1	0	4	0	1	2	1	1	2	1	86
729	1	68	1	2	176	90	2	3	3	21	0	1	4	0	4	0	3	3	0	0	0	0	0	0	1	0	0	1	1	0	0	0	0	0	0	0	0	0	4	30	1	1	1	1	2	2	79
730	1	68	1	2	168	75	1	3	3	21	30	3	6	30	7	0	0	0	0	0	0	0	0	0	1	0	0	0	1	0	0	0	5	1	30	5	1	30	2	30	0	1	1	1	1	1	75
731	1	64	1	3	165	68	1	3	1	20	30	1	5	0	6	0	1	1	0	0	0	0	0	0	1	0	0	0	1	0	0	0	2	1	30	7	1	30	3	30	1	1	1	1	1	1	78
732	1	61	1	2	172	79	1	3	3	22	0	2	5	0	7	0	0	3	0	0	0	0	0	0	0	0	2	0	4	0	0	0	7	0	0	7	1	0	5	0	1	1	1	1	1	1	91
733	2	59	2	3	168	70	1	1	1	21	30	4	7	0	6	2	1	0	0	0	0	0	0	0	0	0	0	0	3	1	1	0	1	1	0	0	0	0	2	30	0	1	1	1	1	1	100
734	1	78	1	3	165	64	2	3	3	21	0	4	6	0	7	3	1	1	0	0	0	0	0	0	2	0	0	0	4	0	0	0	7	1	0	0	0	0	0	0	0	1	1	1	1	1	66
735	1	75	1	4	169	75	3	3	3	23	0	1	7	0	6	0	3	3	0	0	0	0	0	0	1	0	0	0	1	0	0	0	0	0	0	0	0	0	2	0	1	1	1	1	1	1	74
736	1	73	1	2	163	80	1	3	3	22	0	1	4	30	6	0	0	1	0	0	0	0	0	0	0	0	0	0	1	0	0	0	0	0	0	7	1	30	3	30	0	1	1	1	1	1	78
737	1	70	1	2	165	70	1	1	3	21	0	1	5	0	8	0	0	3	0	3	2	0	0	2	1	0	0	1	4	0	0	0	7	1	0	7	1	0	3	0	1	1	1	1	2	2	70
738	1	70	1	3	170	70	2	1	3	22	0	3	5	0	7	0	0	2	0	0	0	0	0	0	0	0	0	0	4	0	0	0	0	0	0	7	1	0	4	0	0	1	1	1	1	1	86
739	1	67	1	2	170	80	1	3	3	22	0	3	6	0	6	0	0	1	0	0	0	0	0	0	0	0	0	0	3	0	0	0	3	1	0	3	1	0	3	0	0	1	1	1	1	1	85
740	1	65	1	3	170	74	2	3	1	22	30	1	7	0	8	0	3	3	0	0	0	0	0	0	1	0	0	0	4	0	0	0	0	0	0	0	0	0	2	0	0	1	1	1	1	1	80
741	1	61	1	2	167	85	1	3	1	21	0	4	5	0	6	3	0	1	2	0	0	0	0	0	3	0	0	0	3	0	0	0	7	2	0	0	0	0	0	0	1	1	1	1	1	1	70
742	1	92	1	3	158	63	3	3	3	20	30	2	3	30	7	0	0	0	0	0	0	0	0	0	0	0	0	0	1	1	1	20	5	1	30	7	1	30	1	30	0	1	1	1	1	1	88
743	1	68	1	4	176	75	2	3	3	21	30	1	6	30	7	0	0	0	0	0	0	0	0	0	0	0	0	0	1	0	0	0	7	2	30	7	2	30	2	30	1	1	1	1	1	1	78
744	1	65	1	4	170	70	2	3	2	21	0	1	5	30	8	0	0	3	0	0	0	0	0	0	0	0	0	0	1	0	0	0	1	1	0	0	0	0	4	0	1	1	1	1	1	1	90
745	1	69	1	4	177	90	1	3	3	21	30	2	6	30	8	0	0	0	0	0	0	0	0	0	1	0	0	0	1	0	0	0	5	1	30	7	1	30	3	20	0	1	1	1	1	1	86
746	1	68	1	3	165	75	1	3	1	19	0	4	5	30	4	0	3	3	0	0	0	0	0	0	1	0	0	0	4	0	0	0	0	0	0	0	0	0	4	0	1	1	1	1	1	1	72
747	1	66	1	3	172	60	1	3	3	22	0	1	7	0	7	0	0	0	0	0	0	0	0	0	0	0	0	0	2	1	1	30	2	1	0	7	1	30	3	30	0	1	1	1	1	1	88
748	1	66	1	3	172	60	1	1	3	22	0	1	6	0	7	0	0	0	0	0	0	0	0	0	1	0	0	0	1	3	1	0	6	1	0	6	1	0	2	0	0	1	1	1	1	1	99
749	1	75	1	3	163	60	2	3	1	21	0	4	5	0	7	3	1	3	0	0	0	0	3	0	3	3	0	0	1	0	0	0	7	0	40	7	2	0	5	0	1	1	1	1	1	1	75
750	1	73	1	2	170	70	2	3	3	21	21	2	6	30	7	0	0	0	0	0	0	0	0	0	0	0	0	0	1	0	0	0	7	1	0	7	1	0	2	10	1	1	1	1	1	1	81
751	1	69	1	4	170	75	1	2	2	21	30	3	6	30	6	0	0	1	0	0	0	0	0	0	0	0	0	0	3	1	1	10	1	0	0	6	2	10	1	0	1	1	1	1	1	1	83
752	1	66	1	3	168	70	1	3	1	21	30	1	6	10	7	0	0	0	0	0	0	0	0	0	1	0	0	0	1	0	0	0	6	1	30	6	1	30	2	30	1	1	1	1	1	1	91
753	1	63	1	3	170	70	2	3	3	22	0	1	6	30	7	0	0	0	0	0	0	0	0	0	0	0	0	0	1	0	0	0	0	0	0	7	1	30	3	10	0	1	1	1	1	1	94
754	1	58	1	2	174	75	2	3	3	22	10	3	6	30	7	0	0	0	0	0	0	0	0	0	1	0	0	0	1	1	1	20	5	1	30	6	2	20	2	30	0	1	1	1	1	1	89
755	1	74	1	3	165	70	1	3	3	22	0	2	5	30	6	0	1	2	0	0	0	0	0	0	0	0	0	0	1	0	0	0	3	0	40	7	3	0	4	0	0	1	1	1	1	1	81
756	1	65	1	4	185	75	2	3	1	22	0	2	6	0	8	0	0	0	0	0	0	0	0	0	0	0	3	0	1	0	0	0	7	2	0	7	1	0	8	0	1	1	1	1	1	1	87
757	1	73	1	3	165	70	1	3	1	22	30	1	6	30	8	0	3	3	0	3	0	0	3	0	0	0	0	0	4	0	0	0	7	4	0	7	3	0	4	0	1	1	1	1	1	1	80
758	1	73	1	3	165	70	1	3	1	22	0	2	7	0	7	0	0	1	0	0	0	0	0	0	0	0	0	0	4	0	0	0	0	0	0	5	1	0	5	0	1	1	1	1	1	1	82
759	1	71	1	2	170	75	1	2	1	21	30	2	5	30	7	0	0	0	0	0	0	0	0	0	1	0	0	1	1	0	0	0	0	0	0	0	0	0	1	0	1	1	1	1	1	1	82
760	1	69	1	4	162	71	2	3	3	21	30	1	6	30	7	0	0	0	0	0	0	0	0	0	1	0	0	0	1	0	0	0	6	1	30	6	1	20	3	20	0	1	1	1	1	1	89
761	1	66	1	2	168	72	2	3	3	22	0	1	6	0	6	0	0	0	0	0	0	0	0	0	0	0	0	0	1	0	0	0	0	0	0	7	2	0	2	0	1	1	1	1	1	1	90
762	1	66	1	3	167	80	1	3	3	21	30	1	5	30	7	0	1	1	0	0	0	0	0	0	0	0	0	0	2	0	0	0	0	0	0	7	1	30	3	30	0	1	1	1	1	1	87
763	1	66	1	2	170	70	1	3	3	21	30	1	5	30	7	0	0	1	0	0	0	0	0	0	0	0	0	0	1	0	0	0	0	0	0	7	1	30	3	30	0	1	1	1	1	1	95
764	1	53	1	2	170	77	2	1	1	22	0	1	6	0	8	0	0	0	0	0	0	0	0	0	0	0	0	0	4	0	0	0	0	0	0	7	2	0	1	0	0	1	1	1	1	1	85
765	1	70	1	4	165	60	1	3	3	21	20	3	6	30	8	0	0	0	0	0	0	0	0	0	1	0	0	0	1	0	0	0	0	0	0	7	1	30	2	30	0	1	1	1	1	1	85
766	1	72	1	4	170	80	2	3	3	21	30	3	5	30	7	0	0	0	0	0	0	0	0	0	1	0	0	0	1	0	0	0	6	1	30	6	1	30	3	20	0	1	1	1	1	1	88
767	1	72	1	4	170	80	2	3	3	20	30	2	5	20	7	1	0	0	0	0	0	0	0	0	1	0	0	0	1	0	0	0	0	0	0	7	1	30	2	10	0	1	1	1	1	3	90
768	1	65	1	2	175	69	1	3	3	21	30	1	6	30	7	0	0	0	0	0	0	0	0	0	1	0	0	0	1	0	0	0	7	1	30	7	1	30	2	20	0	1	1	1	1	1	74
769	1	71	1	4	175	75	2	3	3	21	30	1	6	30	8	0	0	0	0	0	0	0	0	0	1	0	0	0	1	0	0	0	6	1	30	7	1	30	3	10	0	1	1	1	1	1	85
770	1	70	1	2	180	80	2	3	3	21	30	1	6	30	6	0	1	1	0	0	0	0	0	0	0	0	0	0	2	0	0	0	1	1	30	7	1	30	3	50	0	2	1	1	1	1	100
771	1	70	1	1	168	60	1	3	3	21	0	1	5	0	7	0	0	1	0	0	0	0	0	0	0	0	0	0	1	1	1	10	1	1	20	7	1	40	3	13	0	1	1	1	1	1	80
772	1	66	1	3	166	70	1	3	3	21	30	1	5	0	6	0	1	1	0	0	0	0	0	0	0	0	0	0	1	1	1	0	1	1	0	7	1	30	3	30	0	1	1	1	1	1	85
773	2	62	1	4	160	56	2	3	1	21	30	1	7	30	8	0	2	1	0	0	0	0	0	0	1	0	0	0	1	2	1	0	3	1	0	0	0	0	3	0	0	1	1	1	1	1	80
774	1	65	1	3	168	73	1	2	3	21	0	2	6	30	7	0	1	3	0	3	0	0	0	0	0	0	0	0	4	5	3	0	2	2	0	0	0	0	2	0	1	1	1	1	1	1	80
775	1	51	1	3	170	65	2	3	3	22	0	1	6	0	8	0	0	0	0	0	0	0	0	0	0	0	2	0	2	5	1	0	2	2	0	7	1	0	2	0	0	1	1	1	1	1	95
776	1	60	1	4	172	75	2	3	1	22	0	1	7	0	7	1	1	0	1	1	0	0	0	0	1	1	0	0	2	0	0	0	1	1	0	7	1	0	3	0	0	1	1	1	1	1	85
777	2	61	1	4	162	67	2	3	1	20	0	2	6	30	8	0	1	3	1	2	0	0	2	0	0	3	3	0	4	0	0	0	7	1	0	7	1	0	5	0	1	1	1	1	1	1	83
778	1	70	1	4	181	95	2	3	3	21	0	2	6	0	8	0	0	0	0	0	0	0	0	0	0	0	0	0	1	0	0	0	7	1	30	4	2	30	0	0	0	1	1	1	1	1	82
779	1	83	1	1	174	95	1	2	2	20	10	2	7	30	8	0	1	2	0	1	0	3	0	0	1	0	0	0	1	1	1	0	1	1	3	0	0	0	1	0	0	1	1	1	2	1	50
780	1	83	1	1	160	60	1	3	3	21	0	1	5	0	7	0	1	1	0	0	0	0	0	0	0	0	0	0	1	0	0	0	0	0	0	7	1	0	3	30	0	1	1	1	1	1	90
781	1	83	1	1	165	60	1	3	3	20	10	1	5	10	7	0	0	0	0	0	0	0	0	0	3	0	3	0	1	0	0	0	7	1	10	4	1	10	3	20	0	1	1	1	1	1	88
782	1	83	2	1	165	60	1	3	3	22	0	2	7	0	7	0	0	0	0	0	0	0	0	0	0	0	0	0	2	0	0	0	7	2	0	7	1	0	2	0	0	1	1	1	1	1	84
783	1	66	1	4	181	76	2	3	2	21	50	2	5	30	7	1	1	3	0	0	0	0	1	0	1	0	0	1	4	1	0	10	6	0	50	3	0	30	3	0	1	1	1	1	1	1	86
784	1	71	1	2	176	70	1	3	3	21	30	2	6	30	7	0	0	0	0	0	0	0	0	0	0	0	0	0	1	0	0	0	7	1	30	7	1	30	2	30	0	1	1	1	1	1	85
785	1	70	1	2	170	74	1	3	3	21	0	2	6	0	5	3	3	3	0	3	0	0	0	0	1	0	0	0	4	0	0	0	0	0	0	7	1	30	5	0	1	1	1	1	1	1	83
786	1	69	1	4	165	70	1	2	3	21	0	1	7	0	10	0	0	0	0	0	0	0	0	0	0	0	0	0	1	0	0	0	7	0	10	0	0	0	10	0	1	1	1	1	1	1	80
787	1	68	1	3	172	72	1	3	3	21	30	3	6	30	8	0	0	0	0	0	0	0	0	0	1	0	0	0	1	0	0	0	6	1	30	6	1	30	3	10	0	2	1	1	1	1	77
788	1	68	1	1	173	65	1	3	1	22	0	1	4	30	6	0	1	1	0	0	0	0	0	0	0	0	0	0	1	0	0	0	0	0	0	7	1	30	3	30	0	1	1	1	1	1	91
789	1	67	1	4	174	90	2	3	3	21	0	1	4	30	7	0	1	1	0	0	2	0	0	0	0	0	0	0	4	0	0	0	0	0	0	7	1	30	3	30	0	1	1	1	2	1	85
790	1	74	1	4	173	70	2	3	3	22	30	1	6	10	7	0	0	0	0	0	0	0	0	0	1	0	0	0	1	0	0	0	5	1	30	5	1	30	2	30	1	1	1	1	1	1	90
791	1	73	1	2	168	65	1	1	1	23	0	2	6	0	7	0	0	0	0	0	0	0	0	0	0	0	0	0	4	7	2	0	7	2	0	7	2	0	4	0	0	1	1	1	1	1	72
792	1	63	1	3	165	85	2	3	3	22	10	2	6	30	7	0	0	0	0	2	0	0	0	0	1	0	0	0	1	1	1	10	4	1	30	6	1	30	2	20	0	1	1	1	1	1	89
793	1	63	2	3	165	57	2	1	3	22	0	4	4	30	4	3	3	2	0	0	0	0	0	0	3	1	3	0	4	0	0	0	7	0	40	0	0	0	8	30	0	1	1	1	2	1	60
794	1	70	1	4	165	62	2	3	3	21	0	1	5	30	6	0	0	0	0	0	3	0	0	0	0	0	0	0	1	1	2	30	3	1	50	7	1	10	3	10	1	1	1	1	1	1	91
795	1	64	1	2	163	73	2	3	3	21	30	3	6	30	6	0	0	0	0	2	0	0	0	0	1	0	0	0	1	1	1	30	3	1	20	6	2	30	1	40	0	1	1	1	1	1	86
796	2	62	2	3	163	60	1	3	1	21	0	2	7	0	5	2	1	1	0	0	0	1	0	0	0	1	0	0	4	7	1	0	1	1	0	0	0	0	0	30	1	1	1	1	2	1	85
797	1	62	1	3	173	72	2	3	3	22	0	1	6	0	7	0	2	2	0	0	0	0	0	0	1	0	0	0	3	0	0	0	0	0	0	7	3	0	4	0	0	1	1	1	1	1	93
798	1	60	2	2	172	68.8	1	3	3	22	30	1	5	30	7	0	0	0	0	0	0	0	0	0	0	0	0	0	2	1	1	30	2	2	30	7	1	30	1	30	0	1	1	1	1	1	92
799	1	61	1	2	173	70	1	2	1	22	30	1	6	30	5.5	1	1	2	0	1	0	0	0	0	2	0	0	0	4	0	0	0	0	0	0	7	0	30	10	0	1	1	1	1	2	1	56
800	2	55	1	4	163	60	1	3	1	23	0	2	8	0	3.5	3	0	0	2	0	0	0	0	0	3	3	0	1	4	0	0	0	0	0	0	0	0	0	1	0	1	1	1	1	1	1	80
801	1	65	1	3	175	70	2	2	3	22	0	3	7	0	8	0	2	2	0	3	0	0	0	3	0	0	0	0	4	0	0	0	7	0	60	5	0	30	4	0	1	1	1	1	1	1	70
802	1	65	1	4	180	80	2	3	3	22	0	1	6	0	7	0	2	3	0	0	0	0	0	0	1	0	0	0	4	3	3	0	2	3	0	5	1	0	2	0	1	1	1	1	1	1	96
803	1	63	1	3	180	70	1	1	1	21	0	2	5	0	5	1	2	2	3	0	0	0	0	0	2	0	0	0	4	0	0	0	0	0	0	7	2	0	6	0	0	1	1	1	1	1	86
804	1	71	1	2	176	80	2	3	3	21	30	3	5	30	8	0	0	0	0	0	0	0	0	0	1	0	0	0	1	0	0	0	1	1	30	7	1	30	3	20	0	1	1	1	1	1	86
805	1	73	1	2	168	84	2	3	3	21	0	1	4	30	6	0	0	1	0	0	0	0	0	0	0	0	0	0	1	0	0	0	7	1	0	0	0	0	0	0	0	1	1	1	1	1	63
806	1	80	1	4	165	60	2	3	1	21	0	2	6	30	6	3	3	3	0	3	0	0	0	0	2	0	0	0	4	0	0	0	0	0	0	0	0	0	2	0	1	2	1	1	2	2	71
807	1	72	1	4	171	65	2	3	1	22	30	2	6	30	7	0	0	1	0	0	0	0	0	0	0	0	0	0	1	0	0	0	7	1	30	0	0	0	0	0	1	1	1	1	1	1	75
808	1	71	1	3	162	55	2	3	3	21	30	1	6	30	7	0	3	3	0	0	0	3	0	0	1	0	0	0	1	0	0	0	0	0	0	0	0	0	2	30	1	1	1	1	1	1	80
809	1	57	1	3	165	65	1	1	1	23	0	4	8	0	5	0	0	3	0	0	0	0	0	0	0	0	0	0	4	0	0	0	0	0	0	0	0	0	6	0	0	1	1	1	1	1	78
810	1	68	1	3	174	70	2	3	3	22	0	1	6	0	7	0	0	0	0	0	0	0	0	0	1	0	0	0	4	0	0	0	0	0	0	0	0	0	1	0	0	1	1	1	1	1	89
811	1	76	1	3	169	65	1	3	3	21	0	2	6	0	6	1	0	0	0	0	0	0	0	0	1	0	0	0	4	0	0	0	0	0	0	7	2	0	5	0	0	1	1	1	1	1	82
812	1	69	1	3	167	80	1	3	3	21	30	2	6	30	7	0	0	0	0	0	0	0	0	0	0	0	0	0	1	0	0	0	6	3	20	6	2	20	3	20	0	1	1	1	1	1	81
813	1	77	1	4	170	86	2	1	2	22	0	3	7	0	7.5	3	2	3	0	3	0	0	0	3	1	0	0	1	1	0	0	0	7	0	20	0	0	0	10	0	1	1	1	1	2	1	50
814	1	77	1	3	156	60	1	3	3	22	0	2	6	30	8	0	2	3	0	0	2	0	0	0	0	0	0	0	2	0	0	0	0	0	0	7	1	0	6	0	0	2	1	1	1	1	92
815	1	68	2	2	169	80	1	1	1	19	0	1	5	0	9	0	0	0	0	0	0	0	0	0	0	0	0	0	1	1	3	0	7	0	0	7	3	0	2	0	0	1	1	1	1	1	80
816	1	58	1	3	184	50	1	1	3	22	30	1	6	30	7	0	0	0	0	0	0	0	0	0	1	0	0	0	1	0	0	0	5	1	30	5	1	30	2	30	0	1	1	1	1	1	90
817	1	84	1	4	165	66	2	3	3	22	0	3	6	30	3.5	3	3	3	0	0	0	0	0	0	2	0	0	2	4	0	0	0	7	1	30	0	0	0	3	0	1	1	1	1	3	1	60
818	1	63	1	3	173	90	1	1	3	21	0	1	5	0	6	0	0	0	0	3	0	0	0	0	0	0	0	0	4	0	0	0	0	0	0	7	3	0	6	0	1	2	1	1	2	1	81
819	1	61	1	4	178	45	2	3	1	19	30	1	5	30	8	0	0	0	0	0	0	0	0	0	0	0	0	0	4	0	0	0	1	3	0	0	0	0	3	0	0	1	1	1	1	1	90
820	1	61	1	2	162	50	2	3	3	22	0	1	7	0	8	0	0	0	0	0	0	0	0	0	0	0	0	0	1	1	1	30	2	1	10	7	2	10	2	45	0	1	1	1	1	1	76
821	1	64	1	4	170	74	1	1	1	23	10	2	6	30	6	0	0	1	0	1	0	0	1	1	2	3	0	0	4	0	0	0	7	1	0	7	1	0	5	0	1	2	1	1	2	1	68
822	1	50	2	4	170	50	2	3	3	22	0	1	7	0	8	0	0	3	0	0	0	0	2	0	0	0	0	0	2	1	1	0	1	1	0	1	1	0	2	0	0	1	1	1	1	1	81
823	1	75	1	4	172	80	2	3	1	22	0	1	4	0	5	1	1	0	0	0	0	0	0	0	0	0	0	0	1	0	0	0	0	0	0	7	1	30	3	30	1	1	1	1	1	1	91
824	1	71	1	1	160	51	2	3	3	21	0	1	6	0	8	0	2	2	0	0	0	0	0	0	1	0	2	0	2	0	0	0	0	0	0	7	2	0	2	0	1	1	1	1	1	1	88
825	1	69	1	3	178	80	1	3	3	21	30	1	6	30	7	0	0	0	0	0	0	0	0	0	1	0	0	0	1	0	0	0	7	1	30	6	1	30	2	30	0	1	1	1	1	1	85
826	1	67	1	4	163	74	2	3	1	21	0	1	6	0	8	0	2	2	0	0	0	0	0	0	1	0	2	0	2	0	0	0	0	0	0	7	1	0	2	0	1	1	1	1	1	1	85
827	1	71	1	4	178	90	1	1	1	21	0	1	4	0	7	0	0	2	0	1	0	0	0	0	0	0	0	0	3	0	0	0	7	1	0	7	1	30	6	0	1	1	1	1	1	1	88
828	1	68	1	2	165	58	1	3	1	23	0	3	5	30	6	2	2	2	0	3	0	0	0	0	1	0	0	0	4	0	0	0	0	0	0	7	1	0	5	0	0	1	1	1	1	1	85
829	1	68	1	3	173	60	2	1	3	22	0	1	6	0	8	0	0	0	0	3	0	0	0	0	1	0	0	0	1	0	0	0	0	0	0	0	0	0	4	0	0	1	1	1	1	1	85
830	1	69	1	4	172	90	2	3	3	21	30	2	4	30	6	0	0	0	0	0	0	0	0	0	0	0	0	0	3	0	0	0	6	1	0	6	0	0	3	0	0	1	1	1	1	1	80
831	1	69	1	2	178	62	1	3	3	22	0	2	6	0	6	1	1	2	0	0	0	0	1	0	1	0	0	0	3	0	0	0	0	0	0	7	4	0	5	0	0	1	1	1	1	1	80
832	1	56	1	3	172	63	3	3	3	21	0	1	6	30	8	0	3	3	0	0	0	0	0	3	1	0	0	1	4	0	0	0	0	0	0	7	2	0	4	0	1	1	1	1	2	2	83
833	1	61	1	3	180	90	1	3	3	22	0	1	6	30	7	0	0	1	0	0	0	0	0	0	0	0	0	0	1	0	0	0	0	0	0	7	1	30	3	0	0	1	1	1	1	1	95
834	1	74	1	1	170	78	2	3	3	21	30	3	6	20	7	0	0	0	0	0	0	0	0	0	1	0	0	0	1	1	1	10	5	1	10	7	1	30	1	20	0	1	1	1	1	1	83
835	1	60	1	4	171	67	2	3	3	22	0	1	6	0	7	0	1	1	0	0	0	0	0	0	1	0	0	0	4	0	0	0	0	0	0	7	3	0	3	0	0	1	1	1	1	1	90
836	1	64	1	1	167	75	1	3	1	21	0	4	6	0	7	3	3	3	0	0	0	0	0	0	2	0	0	0	4	0	0	0	0	0	0	0	0	0	8	0	0	1	1	1	1	1	81
837	1	69	1	3	172	83	1	3	3	22	0	1	5	30	6	0	1	1	0	1	0	0	0	0	0	0	0	0	1	0	0	0	0	0	0	7	1	30	3	30	1	1	1	1	1	1	91
838	1	71	1	4	170	80	1	3	3	22	0	1	6	0	8	0	0	2	0	0	0	0	0	0	0	0	0	0	4	0	0	0	7	1	0	7	1	0	5	0	1	1	1	1	1	1	92
839	1	66	1	3	172	70	1	1	3	23	0	2	5	20	6	0	0	0	0	0	0	0	0	0	1	0	0	0	1	0	0	0	7	1	30	7	1	30	0	0	0	1	1	1	1	1	100
840	1	64	1	3	170	70	1	3	3	21	0	1	6	0	9	0	0	1	1	1	0	0	0	0	1	1	1	1	1	1	2	0	2	2	10	0	0	0	2	18	0	1	1	1	1	1	92
841	1	54	1	4	165	70	3	1	2	19	30	2	5	30	7.5	0	0	0	0	0	0	0	0	0	0	0	0	0	1	0	0	0	7	1	0	7	1	0	3	0	1	1	1	1	1	1	100
842	1	72	1	4	165	64	2	3	3	21	30	1	6	0	7	0	1	3	0	0	0	0	0	0	1	1	0	0	3	0	0	0	7	1	0	0	0	0	0	0	0	1	1	1	1	1	84
843	1	72	1	2	160	65	1	3	3	21	30	2	5	30	6	1	3	3	0	0	0	0	0	0	1	0	0	0	4	0	0	0	0	0	0	7	1	0	5	0	1	1	1	1	1	1	82
844	1	66	1	4	168	62	3	3	2	21	0	2	6	30	8	1	2	3	0	0	0	0	1	1	1	0	0	1	4	0	0	0	0	0	0	7	4	30	4	0	1	1	1	1	2	2	67
845	1	78	1	2	167	60	1	3	3	22	0	1	6	0	6	0	0	1	0	0	0	0	0	0	0	0	0	0	1	0	0	0	0	0	0	7	1	0	4	45	0	1	1	1	1	1	80
846	1	75	1	2	170	60	1	1	1	22	0	1	6	0	7	0	0	0	0	0	0	0	0	0	0	0	0	0	1	0	0	0	7	1	0	0	0	0	0	0	0	2	1	1	2	2	60
847	1	73	1	2	170	70	1	1	3	21	20	1	6	30	7	0	0	0	0	0	0	0	0	0	1	0	0	0	1	0	0	0	5	1	30	7	1	30	3	10	0	1	1	1	1	1	83
848	1	72	1	1	162	80	1	3	3	21	30	1	6	30	8	0	0	0	0	0	0	0	0	0	1	0	0	0	1	0	0	0	7	1	30	6	1	30	3	20	1	1	1	1	1	1	81
849	1	72	1	1	165	70	1	3	1	22	0	2	4	0	5	2	1	1	0	0	0	0	0	0	1	0	0	0	1	0	0	0	0	0	0	7	2	0	5	0	1	1	1	1	1	1	82
850	1	65	1	4	170	82	1	1	3	21	30	1	6	30	8	0	0	0	0	0	0	0	0	0	1	0	0	0	1	0	0	0	5	1	30	5	1	30	2	30	0	1	1	1	1	1	70
851	1	64	1	4	168	70	2	3	3	21	30	3	6	30	7	0	0	0	0	0	0	0	0	0	1	0	0	0	1	0	0	0	6	1	30	6	1	30	2	30	1	1	1	1	1	1	72
852	1	75	1	3	175	80	2	3	3	21	30	3	6	30	7	0	0	0	0	0	0	0	0	0	1	0	0	0	1	0	0	0	6	1	30	6	1	30	3	20	0	1	1	1	1	1	80
853	1	71	1	2	170	65	3	3	3	21	0	2	5	30	7	3	3	3	0	0	0	0	0	0	1	0	0	0	1	7	2	0	7	2	0	0	0	0	6	0	0	1	1	1	1	1	73
854	1	69	1	2	165	50	1	3	3	21	30	3	6	30	7	0	0	0	0	0	0	0	0	0	1	0	0	0	1	0	0	0	6	1	30	7	1	30	2	10	0	1	1	1	1	1	82
855	1	68	1	2	170	80	1	3	3	21	30	1	6	30	6	0	0	1	0	0	0	0	0	0	0	0	0	0	1	0	0	0	0	0	0	7	1	30	3	30	0	1	1	1	1	1	90
856	1	64	1	3	165	60	2	3	3	22	10	3	6	10	7	0	0	0	0	0	0	0	0	0	1	0	0	0	1	0	0	0	5	1	30	6	1	30	2	10	0	1	1	1	1	1	81
857	1	62	1	3	168	55	1	3	1	22	30	2	6	30	5	0	2	3	3	0	0	0	1	0	2	0	0	0	1	3.5	0	30	0	0	0	7	1	0	5	0	1	1	1	1	2	1	70
858	1	67	1	3	175	70	1	3	3	21	30	2	6	30	7	0	0	0	0	0	0	0	0	0	0	0	0	0	1	0	0	0	7	1	0	7	2	0	3	0	0	1	1	1	1	1	94
859	1	67	1	3	168	80	2	3	3	21	30	2	6	30	8	0	0	0	0	0	0	0	0	0	1	0	0	0	1	0	0	0	7	1	30	7	1	30	3	20	0	1	1	1	1	1	78
860	1	67	1	4	170	80	2	3	3	21	30	1	6	10	8	0	0	0	0	0	0	0	0	0	3	0	0	0	1	0	0	0	7	1	30	7	1	30	2	30	0	1	1	1	1	1	87
861	1	63	1	4	173	65	2	3	3	21	30	3	6	30	8	0	0	0	0	0	0	0	0	0	0	0	0	0	1	0	0	0	7	1	30	7	3	10	3	20	0	1	1	1	1	1	89
862	1	55	1	4	170	55	1	3	3	22	0	2	6	0	6	2	0	0	0	0	0	0	0	0	1	0	0	0	1	0	0	0	0	0	0	7	1	0	5	0	0	1	1	1	1	1	86
863	1	55	1	4	170	65	1	3	3	22	0	1	6	0	7	0	0	0	0	0	0	0	0	0	0	0	0	0	1	0	0	0	0	0	0	7	1	30	3	30	0	1	1	1	1	1	88
864	1	72	1	3	173	65	2	3	1	22	0	3	6	0	8	0	2	1	0	0	0	0	0	0	1	0	0	0	2	0	0	0	7	2	0	7	1	0	3	0	0	1	1	1	1	1	85
865	1	83	1	4	173	85	2	3	3	22	30	3	7	0	4.5	3	0	0	0	3	0	0	2	0	1	0	0	0	1	0	0	0	7	0	30	0	0	0	3.5	0	1	1	1	1	2	2	70
866	1	75	1	2	166	75	2	3	3	21	0	1	4	0	7	0	1	1	0	1	0	0	0	0	1	0	0	0	2	7	1	30	7	1	0	7	1	30	0	0	1	1	1	1	1	1	81
867	1	83	1	2	172	71	2	3	3	22	0	1	5	30	7	0	0	3	0	0	0	0	0	0	0	0	0	0	4	0	0	0	0	0	0	7	1	0	1	0	1	1	1	1	1	1	96
868	1	80	1	4	170	52	2	3	3	22	6	1	7	0	7	0	0	0	0	0	0	0	0	0	0	0	0	0	4	0	0	0	0	0	0	0	0	0	4	0	1	1	1	1	1	2	87
869	1	71	1	4	183	80	3	2	3	21	0	2	7	30	7	0	2	2	0	0	0	0	0	0	3	3	0	0	4	0	0	0	0	0	0	7	1	0	4	30	1	1	1	1	1	1	88
870	1	74	1	4	166	78	2	2	1	21	40	2	6	45	7	0	0	3	0	0	0	0	0	2	1	0	0	0	4	0	0	0	0	0	0	3	0	30	2	15	1	5	3	2	2	1	77
871	1	81	1	4	166	54	2	3	3	23	0	3	5	0	5	0	0	3	0	0	0	0	0	2	1	0	0	0	1	0	0	0	7	1	0	0	0	0	2	0	1	3	1	1	4	2	80
872	1	69	1	4	174.5	59	3	2	2	24	30	4	6	30	4	3	3	3	0	0	0	0	0	0	1	0	0	0	4	0	0	0	7	1	0	0	0	0	3	0	1	1	1	1	2	2	80
873	1	72	1	2	168	60	2	3	3	22	0	1	5	30	7	0	1	3	0	0	0	0	1	0	0	0	0	0	4	0	0	0	7	1	0	0	0	0	3	0	1	1	1	1	2	1	88
874	1	70	1	2	176	93	2	3	1	22	30	2	6	30	7	1	1	2	0	2	0	0	2	0	1	3	0	0	4	0	0	0	0	0	0	0	0	0	3	30	1	1	1	1	1	1	95
875	1	65	2	4	172	70	2	3	3	22	0	2	7	30	8	0	0	0	0	0	0	0	0	0	1	0	0	0	3	3	1	0	0	0	0	7	3	0	1	0	1	1	1	1	1	1	80
876	1	69	1	3	160	58	2	3	1	21	30	1	6	30	8	0	0	3	0	0	0	0	0	0	0	0	0	0	1	3	3	0	3	2	0	7	1	0	2	0	0	1	1	1	2	1	80
877	1	67	1	1	165	72	1	3	3	21	0	1	6	0	7	0	0	2	0	0	0	0	0	0	1	0	0	0	1	6	1	0	2	1	0	7	1	0	2	0	0	1	1	1	2	1	77
878	1	77	1	4	180	80	3	3	1	21	0	1	5	30	6	0	2	3	0	0	0	0	0	0	1	0	0	1	1	0	0	0	0	0	0	7	1	0	7	0	1	1	1	1	2	1	81
879	1	67	1	4	160	75	2	2	1	22	30	1	6	0	7	0	3	3	0	1	0	0	0	0	1	0	0	0	4	0	0	0	0	0	0	7	2	0	4	0	0	4	2	2	2	2	80
880	1	63	1	2	156	52	2	3	3	22	0	2	6	0	6	2	1	2	2	2	3	3	0	0	1	0	0	1	4	0	0	0	0	0	0	0	0	0	5	0	1	2	1	1	2	1	67
881	1	66	1	3	176	72	1	3	3	22	0	2	4	0	6	0	3	3	0	0	0	0	0	0	1	0	0	0	4	0	0	0	0	0	0	0	0	0	3	0	1	1	1	1	1	1	66
882	1	54	1	3	176	65	2	3	3	22	30	2	7	30	8	0	0	0	0	0	0	0	0	0	0	0	0	0	1	1	2	0	3	3	20	6	3	20	2	0	0	1	1	1	1	1	85
883	1	70	1	4	176	70	2	2	3	22	0	1	6	0	7	0	0	0	0	0	0	0	0	0	0	0	0	0	3	7	2	0	5	2	30	5	1	30	2	20	0	1	1	1	4	2	50
884	1	69	1	3	170	68	1	3	3	22	0	2	5	0	7	0	3	3	0	3	0	0	0	0	1	0	0	0	4	0	0	0	0	0	0	0	0	0	2	0	0	1	1	1	1	1	74
885	1	86	1	4	173	60	2	2	1	23	0	2	6	30	7	0	1	3	0	1	0	0	0	0	0	0	3	0	1	0	0	0	7	1	0	0	0	0	3	0	0	1	1	1	1	1	77
886	1	78	1	4	156	50	1	3	1	21	0	1	5	30	6	0	0	2	0	0	0	0	0	0	0	0	3	0	1	0	0	0	7	2	0	7	2	0	0	0	0	1	1	1	1	1	88
887	1	72	1	2	173	65	2	3	3	21	30	3	6	30	6	3	3	3	0	0	0	2	2	0	2	2	0	1	4	0	0	0	0	0	0	0	0	0	2	0	0	1	1	1	2	1	62
888	1	69	1	4	167	69	2	2	1	22	0	1	5	0	7	0	0	0	0	0	0	0	0	0	0	0	0	0	4	7	3	50	7	3	50	7	1	30	2	30	0	1	1	1	1	1	100
889	1	53	1	1	168	60	1	3	3	21	0	2	5	0	8	0	0	0	0	0	0	0	0	0	0	0	0	0	4	0	0	0	0	0	0	0	0	0	2	0	0	1	1	1	1	1	90
890	1	78	1	1	168	60	1	3	3	21	30	1	6	0	7	0	1	1	0	0	0	0	0	0	0	0	0	0	1	0	0	0	0	0	0	7	1	30	3	0	0	1	1	1	1	1	82
891	1	65	1	4	180	60	2	3	3	22	0	1	6	0	7	0	0	0	0	0	0	0	0	0	0	0	0	0	2	0	0	0	2	1	30	7	1	33	2	30	0	1	1	1	1	1	89
892	1	71	1	3	170	65	1	3	3	22	30	1	6	0	7	0	1	1	0	0	0	0	0	0	0	0	0	0	2	0	0	0	0	0	0	7	1	0	3	30	0	1	1	1	1	1	79
893	1	59	1	4	170	62	3	3	3	23	0	1	7	0	8	0	1	1	0	0	0	0	0	0	1	0	0	0	1	0	0	0	5	1	30	0	0	0	2	0	0	1	1	1	1	1	83
894	1	67	1	4	175	70	3	3	3	22	0	1	7	0	8	0	0	1	0	0	0	0	0	0	0	0	0	0	2	6	1	0	5	1	0	6	1	0	1	0	0	1	1	1	1	1	83
895	1	65	1	4	172	83	2	3	1	23	0	1	7	30	8	2	1	3	1	0	0	0	0	0	1	0	0	0	4	0	0	0	5	1	0	6	1	30	5	30	0	1	1	1	1	1	86
896	1	61	1	4	165	66	3	2	1	22	30	2	7	30	8	0	0	3	0	0	0	0	0	0	1	0	0	0	3	0	0	0	4	1	0	7	1	0	5	0	0	1	1	1	1	1	85
897	1	69	1	4	180	82	1	2	1	21	30	2	6	50	8	2	0	3	0	0	0	0	0	0	1	3	0	0	3	0	0	0	5	1	30	6	2	0	2	30	1	3	1	1	3	1	85
898	1	62	1	4	168	65	3	3	1	22	30	3	6	0	6	2	1	2	0	1	0	0	0	0	1	1	0	0	4	3	1	0	3	1	20	5	1	0	8	6	1	1	1	1	2	1	80
899	1	69	1	4	170	90	2	3	3	21	0	1	4	0	7	0	1	1	0	0	0	0	0	0	0	0	0	0	2	1	1	30	1	1	0	7	1	30	3	30	0	1	1	1	1	1	83
900	1	79	1	4	172	70	2	3	3	22	0	2	6	0	8	0	0	0	0	0	0	0	0	0	1	0	0	0	1	0	0	0	0	0	0	7	2	0	6	0	0	1	1	1	1	1	100
901	1	67	1	2	178	75	1	1	3	21	0	2	5	0	8	0	0	0	0	0	0	0	0	0	1	0	0	0	4	0	0	0	0	0	0	7	0	0	2	0	0	1	1	1	1	1	82
902	1	66	1	4	176	98	2	2	1	23	0	2	6	30	7	1	1	2	1	1	2	0	0	0	1	0	0	1	3	0	0	0	2	1	0	2	1	0	4	0	1	1	1	1	2	2	60
903	1	65	1	2	160	55	1	3	3	21	0	1	5	0	7	0	0	0	0	0	0	0	0	0	1	0	0	0	2	0	0	0	0	0	0	7	2	0	2	0	0	1	1	1	1	1	91
904	1	65	1	3	173	80	2	3	1	22	0	2	5	0	6	0	0	2	0	0	0	0	0	0	1	0	0	0	3	7	1	0	7	1	0	7	2	0	1	0	1	1	1	1	1	1	100
905	1	59	1	4	170	80	1	3	1	22	0	1	5	30	5	0	2	3	0	0	0	0	1	0	1	0	0	0	1	0	0	0	0	0	0	7	1	0	3	0	1	1	1	1	2	2	80
906	1	60	1	3	165	75	1	3	2	22	0	2	7	0	8	2	1	1	0	0	0	0	0	1	1	0	0	0	3	0	0	0	7	2	0	7	2	0	3	0	1	1	1	1	2	2	80
907	1	66	1	4	183	82.5	3	3	1	22	10	1	10	0	6	1	2	2	0	1	0	0	1	0	1	0	0	0	3	0	0	0	6	2	10	3	1	10	1	30	1	1	1	1	1	1	84
908	1	78	1	4	162	60	3	3	3	21	30	1	6	0	8.5	0	2	1	0	0	0	0	0	0	0	0	0	0	3	0	0	0	7	1	40	7	3	0	4	0	0	1	1	1	1	1	90
909	1	75	1	3	180	75	2	3	3	21	30	1	6	20	7	0	0	0	0	0	0	0	0	0	1	0	0	0	1	0	0	0	6	1	20	6	1	20	3	20	1	1	1	1	1	1	85
910	1	69	1	2	178	90	1	3	3	21	0	1	6	0	6	0	1	1	0	0	0	0	0	0	0	0	0	0	2	0	0	0	0	0	0	7	1	30	3	30	0	1	1	1	1	1	88
911	1	69	1	4	177	82	1	3	1	23	0	2	5	30	6	0	0	0	0	0	0	0	0	0	1	0	0	0	4	6	1	30	7	1	30	7	2	30	4	0	0	1	1	1	1	1	85
912	1	60	1	4	172	80	2	3	1	22	10	3	6	30	8	1	1	3	0	0	2	2	2	2	1	0	0	2	3	2	0	15	3	0	30	7	1	30	3	0	1	3	1	2	3	2	86
913	1	62	1	4	170	82	2	3	1	22	0	2	5	0	6	1	2	3	0	0	0	0	0	0	1	0	0	0	4	7	1	0	3	1	0	0	0	0	2	30	1	1	1	1	2	1	100
914	2	67	1	4	162	55	1	3	1	22	0	1	6	0	6	1	2	1	0	0	0	0	0	1	1	2	0	0	3	1	1	0	5	2	0	7	3	0	2	0	1	1	1	1	2	1	73
915	1	66	1	4	178	66	2	3	1	22	0	2	6	0	7	1	2	2	0	1	0	2	0	1	1	0	0	0	4	0	0	0	0	0	0	0	0	0	8	0	1	1	1	1	1	1	87
916	2	80	2	2	160	70	1	3	1	22	0	1	6	0	8	0	2	2	0	0	0	0	0	0	0	0	0	0	1	1	0	20	5	0	30	7	0	20	2	0	1	2	1	1	2	1	80
917	2	76	1	4	152	55	2	3	1	23	0	2	7	30	7	1	0	3	0	0	0	0	0	0	1	2	0	0	3	0	0	0	0	0	0	0	0	0	3	0	1	1	1	1	2	1	77
918	1	76	1	4	167	78	2	3	1	23	0	2	5	30	6	0	2	2	0	2	0	0	0	0	1	0	0	0	3	0	0	0	0	0	0	7	0	30	4	0	1	1	1	1	1	1	94
919	1	70	1	4	176	76	2	2	3	22	0	1	6	0	8	0	0	1	0	0	0	0	0	0	0	0	0	0	1	0	0	0	0	0	0	3	1	30	1	30	0	1	1	1	1	1	94
920	1	69	1	4	173	72	2	3	2	22	0	1	6	30	7	0	3	2	0	0	0	0	0	0	1	0	0	0	1	0	0	0	6	2	0	2	1	0	1	0	1	1	1	1	2	1	83
921	2	67	1	4	165	61	3	3	1	23	0	2	7	0	1	0	0	0	0	0	0	0	0	0	1	0	0	0	4	2	1	0	1	1	0	7	2	0	2	30	1	1	1	1	2	1	58
922	1	67	1	4	179	71	2	3	3	23	0	3	4	30	5	3	3	0	0	3	0	0	0	0	3	3	0	0	4	3	1	30	7	2	30	0	0	0	4	30	1	1	1	1	1	1	70
923	1	67	1	4	170	75	2	1	1	22	30	2	6	10	6	2	1	3	0	1	0	3	0	0	1	0	0	1	4	3	1	10	5	1	5	1	1	10	1	10	1	1	1	1	2	1	75
924	1	66	1	4	178	70	2	3	2	22	30	1	6	30	8	0	0	3	0	0	0	0	0	0	0	0	0	0	4	1	0	10	5	0	30	7	1	30	5	30	1	1	1	1	1	1	90
925	2	65	1	4	163	67	2	3	1	22	30	1	6	30	8	0	1	3	0	0	0	0	0	0	0	0	0	0	4	1	0	10	5	0	30	7	1	30	5	30	1	1	1	1	1	1	80
926	1	64	1	4	172	75	2	3	1	22	30	1	5	30	6	1	1	0	0	0	0	0	0	0	0	0	0	0	3	4	0.5	0	5	1	30	6	1.5	0	2	30	0	1	1	1	1	1	89
927	1	63	1	4	185	110	2	1	1	23	0	2	7	0	6	0	0	0	0	0	0	0	0	0	1	0	0	0	1	1	1	0	1	1	0	1	1	0	5	0	1	3	1	1	3	2	51
928	2	61	1	3	172	70	1	3	2	22	30	3	5	30	4	3	3	2	0	0	0	0	2	0	2	3	0	0	4	4	1	0	4	1	0	1	1	0	3	0	1	4	2	1	5	1	50
929	1	60	1	4	175	76	2	3	2	22	0	1	5	16	7	2	2	2	0	0	0	0	2	2	1	0	1	2	1	1	1	0	1	1	30	7	2	0	4	16	1	4	1	4	4	2	50
930	1	60	1	4	175	86	2	3	1	23	0	2	6	15	6	0	1	1	0	0	0	0	0	0	0	0	0	0	4	1	0	30	1	0	30	0	0	0	4	30	1	1	1	1	2	1	81
931	1	56	1	3	172	80	1	1	1	23	0	1	7	30	8	0	0	2	0	1	0	0	0	0	0	0	0	0	3	7	0	30	7	0	30	3	0	30	2	0	0	3	1	3	3	1	49
932	2	56	2	4	158	65	3	3	1	22	0	2	6	0	7	0	1	1	0	0	0	0	0	0	0	0	0	0	3	0	0	0	5	0	0	5	0	30	1	0	0	1	1	1	1	1	92
933	2	56	1	4	164	70	2	3	1	24	0	2	7	0	5	2	0	0	0	0	0	0	0	0	1	0	0	0	4	7	3	0	7	2	0	7	3	0	2	0	1	1	1	1	1	1	100
934	2	53	1	4	163	54	2	3	1	22	0	2	6	30	7	0	1	2	0	0	0	0	0	0	1	0	0	0	4	0	0	0	7	1	0	3	1	0	4	0	0	1	1	1	1	1	84
935	1	68	1	4	176	80	2	2	1	22	30	2	6	30	7	1	3	3	0	0	0	0	0	0	1	0	0	0	4	5	1	30	5	1	30	0	0	0	3	30	1	3	1	1	2	1	85
936	1	76	1	2	160	60	2	3	3	22	0	1	6	0	8	0	0	3	0	0	0	0	0	0	0	0	0	0	1	0	0	0	0	0	0	0	0	0	4	20	1	1	1	1	1	1	85
937	1	55	1	2	173	85	1	3	1	23	0	1	5	10	5	0	2	3	0	3	2	1	2	0	0	0	0	0	4	7	0	10	7	1	0	0	0	0	8	0	1	1	1	1	1	1	90
938	2	59	1	3	162	80	2	3	1	22	1	2	6	30	8	0	1	0	0	1	1	1	0	1	1	0	1	0	4	0	0	0	7	1	0	7	0	30	6	0	1	1	1	1	1	1	90
939	1	58	1	4	164	75	3	3	2	22	0	1	6	30	7	0	1	0	0	0	0	1	1	1	0	0	0	1	4	0	0	0	5	1	10	7	1	10	6	0	0	1	1	1	1	1	100
940	2	51	2	4	170	57	2	3	1	23	0	2	7	0	6.5	0	2	2	0	0	0	0	0	0	1	0	0	0	4	0	0	0	5	1	30	7	0	20	3	0	0	1	1	1	1	2	85
941	1	87	1	2	172	71	2	3	3	22	30	1	5	30	7	0	0	0	0	0	0	0	0	0	1	0	0	0	1	1	1	20	6	1	30	7	2	10	1	20	1	1	1	1	1	1	83
942	1	83	1	2	170	68	1	3	3	21	0	1	6	0	7	0	1	1	0	0	0	0	0	0	0	0	0	0	1	0	0	0	0	0	0	7	1	30	3	30	0	1	1	1	1	1	84
943	1	87	1	1	170	70	2	3	1	22	30	1	6	30	7	0	0	0	0	0	0	0	0	0	1	0	0	0	1	0	0	0	5	1	30	7	1	30	3	20	0	1	1	1	1	1	89
944	1	82	1	2	173	63	1	3	3	21	10	1	6	30	7	0	0	0	0	0	0	0	0	0	1	0	0	0	1	1	1	30	6	1	30	4	1	30	1	30	0	1	1	1	1	1	88
945	1	84	1	2	170	62	2	3	3	22	0	1	7	0	7	0	0	0	0	0	2	0	2	0	0	0	0	0	1	0	0	0	0	0	0	7	0	30	6	0	0	1	1	1	1	1	87
946	1	65	1	2	176	75	2	3	3	22	30	1	6	30	8	0	3	3	0	3	0	0	0	0	1	0	0	0	4	0	0	0	0	0	0	0	0	0	7	30	0	1	1	1	1	1	68
947	1	67	1	3	168	70	2	3	1	22	0	2	6	30	7	2	0	2	0	0	0	0	0	0	1	0	0	0	2	2	1	0	2	2	0	6	2	0	0	0	0	1	1	1	1	1	92
948	1	83	2	4	165	70	1	3	3	21	0	2	4	0	7	2	2	1	0	2	0	0	0	0	2	0	0	1	2	0	0	0	7	2	0	7	1	0	3	30	1	1	1	1	2	2	61
949	2	76	1	2	163	65	1	3	1	23	0	3	7	20	8	0	0	0	0	0	0	0	0	0	0	0	0	0	1	0	0	0	7	1	30	7	2	30	2	30	1	1	1	1	1	1	84
950	1	68	1	4	173	75	2	3	3	21	30	2	6	30	7	0	0	0	0	0	0	0	0	0	1	0	0	0	1	0	0	0	7	1	30	7	1	30	2	30	1	1	1	1	1	1	85
951	1	64	1	2	170	75	1	3	1	22	0	2	6	30	6	0	3	3	0	0	0	0	0	0	1	0	0	0	4	0	0	0	0	0	0	7	1	30	5	0	0	1	1	1	1	1	82
952	1	70	1	4	173	77	1	3	3	22	0	1	5	0	7	0	0	0	0	0	0	0	0	0	1	0	0	0	4	0	0	0	0	0	0	7	1	0	2	0	1	1	1	1	1	1	80
953	1	73	1	4	170	80	2	3	3	20	0	2	5	0	7	0	3	3	0	0	0	0	0	0	1	0	0	0	1	0	0	0	0	0	0	0	0	0	2	0	1	1	1	1	1	1	84
954	1	67	1	4	171	70	2	3	1	22	0	2	6	0	4	3	3	3	0	0	0	0	0	0	1	3	0	0	4	0	0	0	0	0	0	0	0	0	0	30	0	1	1	1	1	1	73
955	2	68	1	4	158	60	3	3	1	22	30	3	6	30	7	1	2	3	0	3	0	0	0	0	1	0	0	0	4	0	0	0	0	0	0	7	1	0	1	0	1	1	1	1	2	2	90
956	1	62	1	2	168	70	1	1	1	23	0	2	5	0	6	0	1	3	0	1	0	0	0	0	1	0	0	0	4	0	0	0	7	1	0	7	3	0	2	0	1	2	1	1	1	1	91
957	1	81	1	4	174	70	1	3	3	22	0	2	6	0	8	0	0	0	0	0	0	0	0	0	1	0	0	0	1	7	1	30	7	2	0	7	2	0	4	0	1	1	1	1	1	1	72
958	1	90	1	4	173	50	2	3	3	22	0	4	7	0	8	0	1	3	1	0	0	0	0	1	1	0	0	0	1	0	0	0	0	0	0	7	1	0	6	0	1	1	1	1	1	1	90
959	1	77	1	4	174	64	1	3	3	21	30	3	6	30	7	0	0	0	0	0	0	0	0	0	0	0	0	0	1	0	0	0	7	1	30	7	1	30	3	10	0	1	1	1	1	1	79
960	1	54	1	4	162	60	2	3	1	22	30	2	5	30	5	0	3	2	0	0	0	0	1	1	1	0	0	0	4	5	1	30	5	1	0	7	1	0	6	0	1	5	1	1	1	1	75
961	1	77	1	3	168	70	2	3	3	22	0	3	7	0	6	0	1	1	0	3	0	0	1	3	2	0	1	1	1	0	0	0	0	0	0	7	1	0	5	0	1	1	1	1	2	2	75
962	2	73	1	2	160	58	1	3	1	22	10	2	4	30	6	1	3	1	0	0	0	0	3	3	1	0	0	1	3	0	0	0	7	1	30	7	1	30	4	30	1	2	1	1	2	2	87
963	1	63	1	3	160	60	1	3	3	21	10	1	6	10	8	0	0	0	0	0	0	0	0	0	1	0	0	0	1	0	0	0	1	1	30	6	1	30	3	20	1	1	1	1	1	1	87
964	1	51	1	1	172	50	1	3	3	22	0	2	6	0	8	0	0	0	0	0	0	0	0	0	0	0	0	0	1	0	0	0	0	0	0	0	0	0	2	0	0	1	1	1	1	1	90
965	2	74	1	4	160	60	2	3	1	23	30	1	7	30	6	1	1	2	0	2	0	0	1	0	1	1	0	0	4	0	0	0	7	1	30	0	0	0	2	30	1	1	1	1	2	1	82
966	1	73	1	4	172	75	2	3	1	24	30	2	7	30	6	1	1	3	0	0	0	0	1	3	1	3	0	0	4	0	0	0	7	1	0	7	0	20	2	30	0	1	1	1	3	1	85
967	1	63	1	3	168	65	1	1	1	22	0	1	5	0	7	0	0	0	0	3	0	0	0	0	1	0	0	0	1	0	0	0	0	0	0	7	4	0	4	0	0	1	1	1	1	1	90
968	1	63	1	3	168	65	1	1	1	20	0	2	5	0	6	2	2	1	0	0	0	0	0	0	2	0	0	0	1	0	0	0	7	4	0	0	0	0	0	0	0	1	1	1	1	1	83
969	1	54	1	4	178	86	2	1	1	23	30	1	7	20	7	0	0	1	0	1	0	0	0	0	0	0	0	0	4	3	2	10	3	1	10	0	0	0	1	20	1	1	1	1	1	1	84
970	2	50	1	4	150	50	1	3	1	24	30	2	6	50	6	0	0	2	1	3	0	0	0	1	0	0	0	1	4	0	0	0	5	1	0	7	1	0	12	30	1	1	1	1	2	1	79
971	1	54	1	1	168	70	1	1	1	21	0	1	6	30	8	0	0	0	0	0	0	0	0	0	0	0	0	0	1	5	1	0	5	1	0	5	1	0	1	0	0	1	1	1	1	1	91
972	1	86	1	4	169	68	1	3	3	22	30	1	6	0	7	0	2	3	0	1	0	0	0	0	1	0	0	0	1	0	0	0	0	0	0	7	0	30	6	0	1	1	1	1	1	1	83
973	1	67	1	4	173	80	2	3	1	21	0	1	8	0	8	0	0	1	0	0	0	0	0	0	0	0	0	0	4	1	2	0	3	1	0	3	1	30	2	20	0	1	1	1	1	1	98
974	1	51	1	2	161	60	1	3	3	22	0	1	6	0	8	0	2	1	0	0	0	0	0	0	1	0	0	0	3	0	0	0	7	2	0	0	0	0	2	0	1	1	1	1	1	1	100
975	1	79	1	4	173	65	1	2	1	22	30	2	6	0	7	0	0	1	0	0	0	0	1	0	1	3	0	0	4	0	0	0	0	0	0	7	1	30	8	0	1	1	1	1	2	2	72
976	2	59	1	4	160	61	3	3	1	23	30	1	6	15	7	0	2	1	0	1	0	3	0	0	1	0	0	0	4	1	0	20	1	0	20	3	0	40	11	0	0	1	1	1	2	1	97
977	1	64	1	4	170	80	1	2	2	23	0	3	8	0	5	3	2	3	1	0	0	1	1	2	2	0	1	1	4	0	0	0	6	2	0	6	2	0	3	30	1	1	1	1	1	2	84
978	1	59	1	4	170	80	2	3	3	23	0	1	6	0	7	0	3	3	0	1	0	0	1	0	1	0	0	0	4	0	0	0	2	1	20	7	1	30	3	30	0	1	1	1	1	1	92
979	1	66	1	4	169	73	1	3	1	23	10	2	7	10	8	2	1	2	2	2	1	1	2	1	1	0	1	2	3	2	2	30	5	2	0	7	1	10	3	0	1	1	1	1	2	1	69
980	1	58	1	4	170	71	2	2	1	22	0	3	7	0	7	1	2	3	0	0	0	0	0	0	1	2	0	0	4	0	0	0	6	0	50	7	1	0	4	0	1	1	1	1	1	1	95
981	1	72	1	4	173	63	2	3	3	22	10	1	6	30	8	0	0	0	0	0	0	0	0	0	1	0	0	0	1	0	0	0	7	1	30	7	1	30	3	30	1	1	1	1	1	1	80
982	1	69	1	3	175	70	2	3	3	23	0	1	7	0	8	0	0	3	0	3	0	0	0	0	0	0	0	0	4	0	0	0	7	1	0	7	1	0	5	30	0	1	1	1	1	1	100
983	1	59	1	3	175	80	2	3	1	21	0	1	7	30	10	0	0	2	0	1	0	0	0	0	1	0	0	0	3	0	0	0	7	2	0	7	0	0	1	0	0	1	1	1	1	1	80
984	1	78	1	2	173	65	2	3	3	22	0	1	5	30	7	0	3	2	0	0	0	0	0	0	0	0	0	0	2	2	1	30	1	1	30	7	1	38	2	50	0	1	1	1	1	1	85
985	1	78	1	2	175	60	2	3	3	22	10	3	6	30	7	0	0	0	0	0	0	0	0	0	1	0	0	0	1	0	0	0	6	1	30	6	1	30	2	30	0	1	1	1	1	1	80
986	1	57	1	4	175	92	2	2	2	23	0	3	6	30	6	1	0	2	0	0	0	0	2	0	0	0	0	0	4	0	0	0	0	0	0	0	0	0	10	30	1	1	1	1	2	2	100
987	1	57	1	4	175	92	2	2	2	23	0	3	6	30	6	2	2	3	0	0	0	0	3	0	0	0	0	0	4	0	0	0	4	1	30	0	0	0	10	0	1	1	1	1	2	1	100
988	2	72	1	3	162	67	2	3	1	22	30	4	7	30	5	2	1	2	2	0	2	0	2	2	1	0	1	2	4	3	1	40	1	1	30	2	1	30	0	30	0	3	1	1	3	1	61
989	1	69	1	4	170	80	2	3	3	22	0	2	6	0	7	0	3	3	0	0	0	0	0	0	0	0	0	0	3	0	0	0	0	0	0	7	3	0	4	0	0	1	1	1	1	1	80
990	1	85	1	4	178	85	2	3	3	22	30	4	8	10	8	0	0	0	0	0	0	0	0	0	1	0	0	0	1	0	0	0	6	1	30	6	1	30	2	30	1	1	1	1	1	1	78
991	1	69	2	4	168	72	2	1	1	20	30	4	6	0	6	3	2	2	3	3	3	0	0	0	2	3	0	0	1	0	0	0	1	2	0	7	1	30	4	50	1	1	1	1	1	1	62
992	1	72	1	4	170	79	2	3	3	23	0	1	7	30	7	0	2	3	0	0	0	0	0	0	0	0	0	0	3	1	2	0	2	1	0	7	1	0	3	30	0	1	1	1	1	1	91
